# Supplementary material for: Charge-recombinative triplet sensitization of alkenes for DeMayo-type [2 + 2] cycloaddition
Source: Royal Society of Chemistry journal article supplement (doi:10.1039/d4sc02601b), 2024-01-01

# Charge-Recombinative Triplet Sensitization of Alkenes for DeMayo-type [2+2] Cycloaddition

Yunjeong Lee,<sup>1,‡</sup> Byung Hak Jhun,<sup>2,‡</sup> Sihyun Woo,<sup>3,‡</sup> Seoyeon Kim,<sup>1</sup> Jaehan Bae,<sup>1</sup>  
Youngmin You,<sup>2,\*</sup> and Eun Jin Cho<sup>1,\*</sup>

<sup>1</sup>Department of Chemistry, Chung-Ang University, 84 Heukseok-ro, Dongjak-gu,  
Seoul 06974, Republic of Korea, E-mail: ejcho@cau.ac.kr (E. J. Cho)

<sup>2</sup>Department of Chemical and Biomolecular Engineering, Yonsei University, 50 Yonsei-ro,  
Seodaemun-gu, Seoul 03722, Republic of Korea, E-mail: odds2@yonsei.ac.kr (Y. You)

<sup>3</sup>Division of Chemical Engineering and Materials Science, Ewha Womans University,  
52 Ewhayeodae-gil, Seodaemun-gu, Seoul 03760, Republic of Korea

‡These authors contributed equally.

## Supplementary Information

|                                                                                    |             |
|------------------------------------------------------------------------------------|-------------|
| <b>General Methods</b>                                                             | <b>S-2</b>  |
| <b>Experimental Details</b>                                                        | <b>S-3</b>  |
| <b>Experimental Procedure</b>                                                      | <b>S-6</b>  |
| <b>Supplementary Tables</b>                                                        | <b>S-11</b> |
| <b>Supplementary Figures</b>                                                       | <b>S-31</b> |
| <b>Analytic Data for Synthesized Compounds</b>                                     | <b>S-40</b> |
| <b>References</b>                                                                  | <b>S-51</b> |
| <b>NMR Spectra (<sup>1</sup>H NMR, <sup>13</sup>C NMR, and <sup>19</sup>F NMR)</b> | <b>S-52</b> |

## General Methods

1,4-Dioxane was purchased from Sigma-Aldrich in sure-seal bottles. All commercially available reagents were purchased from Sigma-Aldrich, Alfa Aesar, Combi blocks or TCI companies and used without further purification. Flash column chromatography was performed using ZEOCHEM ZEOprep silica gel 60 (60-200 mesh). The synthesized compounds were characterized by  $^1\text{H}$  NMR,  $^{13}\text{C}$  NMR,  $^{19}\text{F}$  NMR, and FT-IR spectroscopy. NMR spectra were recorded on a Varian 600 MHz instrument (600 MHz for  $^1\text{H}$  NMR, 151 MHz for  $^{13}\text{C}$  NMR, and 564 MHz for  $^{19}\text{F}$  NMR). Copies of  $^1\text{H}$ ,  $^{13}\text{C}$ , and  $^{19}\text{F}$  spectra can be found at the end of the Supporting Information.  $^1\text{H}$  NMR experiments are reported in units, parts per million (ppm), and were measured relative to residual chloroform (7.26 ppm) in the deuterated solvent.  $^{13}\text{C}$  NMR spectra are reported in ppm relative to deuteriochloroform (77.23 ppm), and all were obtained with  $^1\text{H}$  decoupling. Coupling constants were reported in Hz. FT-IR spectra were recorded on a Nicolet 6700 Thermo Scientific FT-IR spectrometer. Reactions were monitored by thin layer chromatography and gas chromatography (GC). Mass spectral data of all unknown compounds were obtained from the Korea Basic Science Institute (Daegu) on a Jeol JMS 700 high-resolution mass spectrometer. Melting points of unknown compounds were recorded on a Stuart SMP30 apparatus. Single crystal X-ray diffraction data were collected in Bruker-AXS SMART BREEZE X-ray diffractometers. The structures were solved with direct methods using the SHELXL programs.

## Experimental Details

### Steady-State UV–Vis Absorption Measurements

UV–Vis absorption spectra were collected on an Agilent, Cary 300 spectrophotometer at 298 K. Sample solutions were prepared prior to measurements at a concentration of 10  $\mu\text{M}$  in 1,4-dioxane, unless otherwise stated. The prepared solution was transferred into a quartz cell (Hellma, beam path length = 1.0 cm) for the measurements.

### Steady-State Photoluminescence Measurements

Photoluminescence spectra were collected on a Photon Technology International, Quanta Master 400 scanning spectrofluorimeter at 298 K. The solutions used for the steady-state UV–Vis absorption studies were also used for the photoluminescence measurements. The excitation wavelengths were 341 nm for **A**, 374 nm for **B**, 378 nm for **C**, 379 nm for **D**, 380 nm for **E**, 375 nm for **F**, 380 nm for **G**, 419 nm for **H**, and 307 nm for **1**. All the solutions were deaerated by bubbling Ar prior to the measurements. A quartz cell (Hellma, beam path length = 1.0 cm) was used for deaerated solution samples.

### Determination of Photochemical Quantum Yields

The quantum yield for the reaction was determined by conducting standard ferrioxalate actinometry. A 6 mM  $\text{K}_3[\text{Fe}(\text{C}_2\text{O}_4)_3]$  solution as chemical actinometer prepared and 1 mL of solution was transferred to the same glassware used in the photoreaction (glass tube having diameter of 1.5 cm), and the solution was photoirradiated with a beam of photoreaction at 450 nm for 20 s. The same volume of 1 wt % 1,10-phenanthroline in sodium acetate buffer solution was added and stored in the dark for 1 h. The absorbance changes at 510 nm was measured by UV–Vis spectrophotometer (Agilent, Cary 300); inserting the value to the following equation returned light intensities  $3.15 \times 10^9$  einstein  $\text{s}^{-1}$  at 450 nm:

$$\text{light intensity } (I_0, \text{ einstein s}^{-1}) = (\Delta\text{Abs}(510 \text{ nm}) \times V) / (\Phi \times 11050 \text{ M}^{-1} \text{ cm}^{-1} \times \Delta t)$$

where,  $\Delta\text{Abs}(510 \text{ nm})$ ,  $V$ ,  $\Phi$ , and  $\Delta t$  are the absorbance change at 510 nm, volume (L), quantum yield (0.85) of the ferrioxalate actinometer at 450 nm, and photoirradiation time (s), respectively. Finally, the reaction yield for the reaction condition utilizing 2.5 mol% photocatalyst was quantified and inserted into following equation to afford PCQY:

$$\text{PCQY} = \frac{[\text{product}] \times V}{I_0 \times \Delta t}$$

where, [product] is the molar concentration of the products calculated from  $^1\text{H}$  NMR,  $\Delta t$  (s) is the photoirradiated time,  $V$  is the volume of the solution (L), and  $I_0$  is the light intensity obtained by actinometry described above.

### Determination of Relative Photoluminescence Quantum Yield

The photoluminescence quantum yield ( $\Phi_{\text{PL}}$ ) was determined for 10  $\mu\text{M}$  sample solutions dissolved in Ar-saturated 1,4-dioxane. The  $\Phi$  was calculated using the equation  $\Phi_{\text{PL}} = \Phi_{\text{ref}} \times (I/I_{\text{ref}}) \times (A_{\text{ref}}/A) \times (n/n_{\text{ref}})^2$ , where  $A$ ,  $I$ , and  $n$  are the absorbance at the excitation wavelength, the integrated photoluminescence intensity, and the refractive index of the solvent, respectively. 9,10-Diphenylanthracene ( $\Phi_{\text{ref}} = 1.00$ , toluene;  $\lambda_{\text{ex}} = 366 \text{ nm}$ )<sup>S1</sup> was used as the reference material. Photoluminescence spectra were collected at 298 K in the emission range 350–850 nm, and were integrated using the OriginLab, OriginPro 2023b software.

### Photoluminescence Lifetime Measurements

Photoluminescence decay traces were collected by employing time-correlated single-photon-counting (TCSPC) technique using a PicoQuant, FluoTime 200 instrument through a motorized monochromator at the peak emission wavelength of each sample. A pulsed light-emitting diode that produced 345 nm pulses (PicoQuant, PLS 340) was driven by a PDL800-D driver (PicoQuant). Photoluminescence decay traces were acquired with 25 ps of a pulse duration. Transient photon signals were collected at the following wavelengths: 489 nm for **A**, 484 nm for **B**, 491 nm for **C**, 539 nm for **D**, 479 nm for **E**, 478 nm for **F**, 486 nm for **G**, and 462 nm for **H**. Photoluminescence decay profiles were fitted to a mono-exponential decay model embedded on an OriginLab, OriginPro 2023b software.

### Electrochemical Characterization

Cyclic and differential pulse voltammograms of the Ar-saturated anhydrous *N,N*-dimethylformamide (DMF) solutions (3.0 mL) containing sample (2.0 mM for organoPCs and 10 mM for **1**) and 0.10 M tetrabutylammonium hexafluorophosphate (TBAPF<sub>6</sub>) were collected using a CH instruments, CHI630B potentiostat at 298 K. A standard three-electrode-assembly cell consisting of a platinum working electrode, a platinum counter electrode and an Ag/AgNO<sub>3</sub>

pseudo reference electrode was used. The potentials were reported against saturated calomel electrode. The ferrocene/ferrocenium redox couple was employed as an external standard. Scan rates for cyclic and differential pulse voltammetries were  $0.1 \text{ V s}^{-1}$  and  $4 \text{ mV s}^{-1}$ , respectively. A blank sample containing  $0.10 \text{ M TBAPF}_6$  only was also examined in the same range in order to assess the validity of the reduction potential. The excited-state oxidation ( $E_{\text{ox}}^*$ ) and reduction ( $E_{\text{red}}^*$ ) potentials of catalysts were calculated from the ground-state redox potentials and the singlet-state energy which was determined by optical bandgap from the onset of UV–Vis absorption spectra.

### **Spectroelectrochemical Measurements**

UV–Vis–NIR absorption spectra were obtained on an Agilent, Cary 5000 spectrophotometer using the amperometric  $I-t$  curve method. A baseline was established with a  $0.10 \text{ M TBAPF}_6$  solution (DMF) placed in a spectroelectrochemical cell (beam path length =  $0.5 \text{ mm}$ ) equipped with a Pt mesh working electrode, a Pt wire counter electrode, and an Ag/AgNO<sub>3</sub> pseudo-reference electrode. An Ar-saturated DMF ( $500 \mu\text{L}$ ) containing  $2.0 \text{ mM A}$  and  $0.10 \text{ M TBAPF}_6$  was then transferred to the spectroelectrochemical cell and applied under a cathodic potential of  $-2.0 \text{ V vs Ag/AgNO}_3$ .

## Experimental Procedure

### Synthetic procedure for the preparation of 2-(2-(prop-1-yn-1-yl)phenyl)-1H-benzo[f]isoindole-1,3(2H)-dione (**S2**)

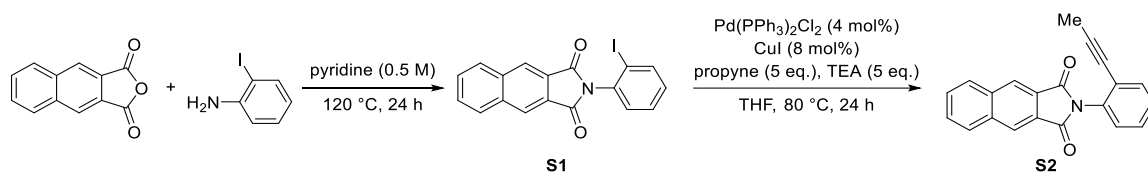

Step 1: An oven-dried round-bottom flask equipped with a magnetic stir bar was charged with a 2,3-naphthalic anhydride (1.0 eq.), 2-iodoaniline (1.0 eq.), and pyridine (0.5 M). Then, the mixture was stirred at 120 °C for 24 h. After the reaction had completed, the reaction was quenched with NH<sub>4</sub>Cl and extracted with DCM. The organic layer was washed with NH<sub>4</sub>Cl and brine, dried over MgSO<sub>4</sub> and the mixture was concentrated in vacuo to give a crude residue. Hexanes were added to the crude, and then it was filtered with cold hexanes to give the product, **S1** (white solid, 80%).

Step 2: A pressure vessel equipped with a magnetic stir bar was charged **S1** (1.0 eq.), Pd(PPh<sub>3</sub>)<sub>2</sub>Cl<sub>2</sub> (4 mol%), CuI (8 mol%), TEA (5.0 eq.), and THF (1.0 M) under argon. Then, argon was bubbled through the reaction mixture for 10 min, this was followed by the addition of propyne (1.0 M in DMF, 5.0 eq.). Then, the mixture was stirred at 80 °C for 24 h. After the reaction had completed, the mixture was concentrated in vacuo to give a crude residue that was purified by silica gel column chromatography to give the product, **S2** (white solid, 78%).

### Synthesis of indole-fused polycyclic organophotocatalysts (**A**)

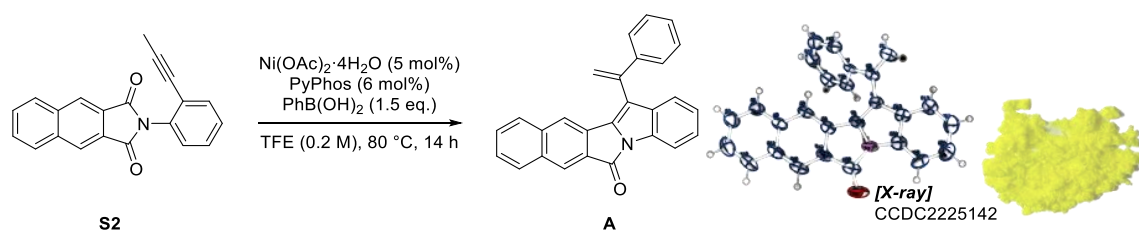

An oven-dried 100 mL round-bottom flask equipped with a magnetic stir bar was charged with **S2** (1.0 eq.), Pyphos(6 mol%), Ni(OAc)<sub>2</sub>·4H<sub>2</sub>O (5 mol%), and phenyl boronic acid (1.5 eq.), and TFE (0.2 M) in a glove box. Then, the mixture was stirred at 80 °C for 14 h. Upon completion of the reaction, the reaction mixture was cooled to room temperature and filtered.

The filter cake was washed with cold methanol with three times, then purified by silica gel column chromatography to give the product, **A** (yellow solid, 80%).

### Synthetic procedure for the preparation of phthalimide derivatives (**S4**)<sup>S2,S3</sup>

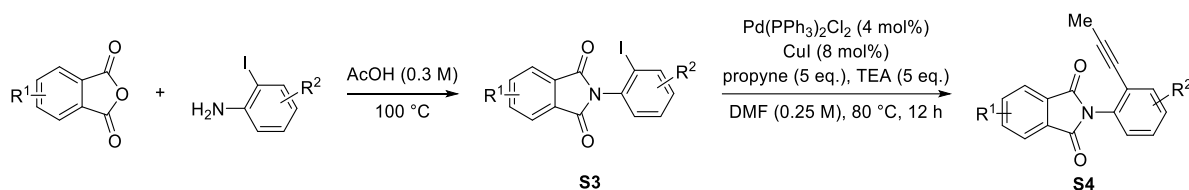

Step 1: 2-iodoaniline derivative (1.0 eq.) and phthalic anhydride derivative (1.0 eq.) were dissolved in AcOH (0.3 M). The above solution was vigorously stirred under reflux for 1 hour before pouring to a flask with ice water (0.02 M), and white precipitation rapidly dissolved out. The solvent was removed through filtration, then the residue was washed with water and petroleum ether to give the product, **S3**.

Step 2: A round-bottom flask equipped with a magnetic stir bar was charged **S3** (1.0 eq.), Pd(PPh<sub>3</sub>)<sub>2</sub>Cl<sub>2</sub> (4 mol%), CuI (8 mol%), TEA (5.0 eq.), and DMF (0.25 M) under argon. Then, argon was bubbled through the reaction mixture for 10 min, this was followed by the addition of propyne (1.0 M in DMF, 5.0 eq.). Then, the mixture was stirred at 80 °C for 12 h. After 12 h, saturated aqueous NH<sub>4</sub>Cl was added to the reaction mixture, and the mixture was diluted with EtOAc and washed with brine. The organic layer was dried over anhydrous MgSO<sub>4</sub>, filtered, and concentrated in vacuo. The crude product was purified by flash column chromatography using hexanes/EtOAc as the eluent to afford the corresponding coupled product **S4**.

### Synthesis of indole-fused polycyclic organophotocatalysts (**B-H**)<sup>S2</sup>

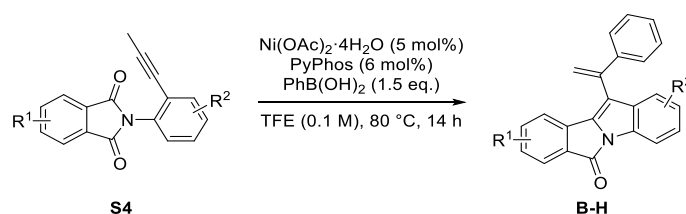

An oven-dried 100 mL reaction tube with rubber septum, equipped with a magnetic stirrer bar, was charged with **S4** (1.0 eq.), Pyphos (6 mol%), Ni(OAc)<sub>2</sub>·4H<sub>2</sub>O (5 mol%), phenyl boronic acid (1.5 eq.) and TFE (0.1 M) in a glove box. Then, the mixture was stirred at 80 °C for 14 h. Upon completion of the reaction, the reaction mixture was cooled to room temperature and

filtered. The filter cake was washed with cold methanol with three times, then purified by silica gel column chromatography to give the indole-fused polycyclic organophotocatalyst.

### Procedure for the synthesis of methyl 2-(quinolin-2-yl)acetate (**1**)<sup>S4</sup>

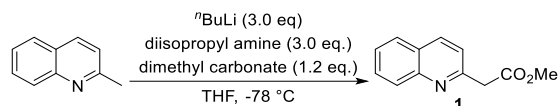

Following the reported procedure, an oven-dried 100 mL round-bottom flask equipped with a magnetic stir bar was charged with to a diisopropyl amine (2.0 eq.) and dry THF (1.0 M) under argon atmosphere at 0 °C. Then, <sup>n</sup>BuLi (2.0 M in hexanes, 2.0 eq.) was added to the solution and the solution was stirred at this temperature for 15 min. A solution of 2-methylquinoline (1.0 eq.) in dry THF (0.5 M) was added dropwise to the LDA solution at -78 °C. The reaction mixture was stirred at this temperature for 2 h. After this time, dimethyl carbonate (1.2 eq.) was added to the reaction mixture quickly. After stirring at -78 °C for 15 min, the reaction mixture was quenched by water and warmed to room temperature. The mixture was diluted by water (50 mL) and extracted with EtOAc (100 mL). The organic layer was dried over MgSO<sub>4</sub>, filtered, concentrated under reduced pressure, and purified by flash column chromatography to give the product, **1**. The analytical data of the synthesized compound (**1**) matched with reported literature data.

### General procedure for [2+2] cycloaddition reaction<sup>S5</sup>

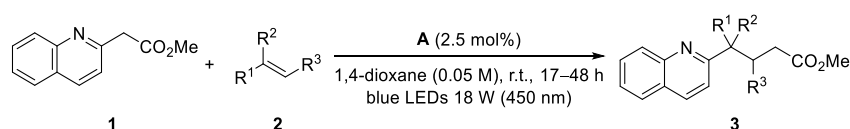

An oven-dried reusable test tube equipped with a magnetic stir bar was charged with a **1** (1.0 eq.) then was brought into a glove box. An alkene derivative **2** (5.0 eq.), indole-fused polycyclic organophotocatalyst (2.5 mol%) and 1,4-dioxane (0.05 M) were added to the reaction mixture in the glove box and the tube was sealed with a silicon septum screw cap. The tube placed under the light from blue LEDs (18 W, 450 nm) at room temperature. The reaction progress was monitored by thin layer chromatography or gas chromatography (GC). Upon completion of the reaction, the mixture was concentrated in vacuo to give a crude residue that was purified by silica gel column chromatography to give the corresponding [2+2] cycloaddition product, **3**.



**Photoluminescence titration experiments.** Photoluminescence spectra were recorded for a 1,4-dioxane solution containing 1.0 mM catalysts with added **1** (0–500 mM). A gradual decrease in the photoluminescence emission was ascribed to excited-state interactions between an organoPC and **1**. The photoluminescence quenching of organoPCs were also supported by the photoluminescence decay experiments for 1.0 mM organoPC in deaerated 1,4-dioxane with increased concentrations of substrate. The quenching rate was evaluated as  $1/\tau - 1/\tau_0$ , where  $\tau$  and  $\tau_0$  are the photoluminescence lifetime of an organoPC in the presence and absence of **1**, respectively. The  $1/\tau - 1/\tau_0$  values were fit to the pseudo-first-order plot  $1/\tau - 1/\tau_0 = k_Q \times [\mathbf{1}]$ , where  $k_Q$  and  $[\mathbf{1}]$  are the quenching rate constant and the molar concentration of **1**, respectively.

**Quantum chemical calculations.** Quantum chemical calculations based on the density functional theory (DFT) were performed using the Amsterdam Density Functional (ADF) package, a component of the Amsterdam Modeling Suites software (AMS2023.101 release). The ground state geometries of all compounds have been optimized at B3LYP-D3(BJ)/TZP level, with the conductor-like screening model (COSMO) parameterized for 1,4-dioxane. Subsequently, single-point energy calculations were performed for 15 states of singlet and triplet excited states at the w-B97X-D/TZP level, employing Tamm-Dancoff Approximation (TDA) and the COSMO parameterized for 1,4-dioxane. To account for relativistic effects, the zeroth-order regular approximation (ZORA) was employed, thus returning the spin-orbit coupling matrix element (SOCME) between the singlet states and triplet states. The intersystem crossing rate constants between the lowest singlet excited state ( $S_1$ ) and the lowest triplet excited state ( $T_1$ ) for benzenoid and quinoid form of substrate were calculated according to the following equations:

$$k_{ISC} = \frac{2\pi}{\hbar} |V_{SOC}|^2 \frac{1}{\sqrt{4\pi k_B T}} \exp \left[ -\frac{(\Delta E_{ST} + \lambda)^2}{4\lambda k_B T} \right]$$

where the  $V_{SOC}$  is SOCME,  $k_B$  is the Boltzmann constant,  $\Delta E_{ST}$  is the adiabatic energy difference between  $S_1$  energy level at the  $S_1$  optimized geometry and  $T_1$  energy level at the  $T_1$  optimized geometry,  $\lambda$  is the reorganization energy. To evaluate parameters consisting this equation, the  $S_1$  and  $T_1$  state geometries were optimized at the level of w-B97X-D/TZP with TDA using the COSMO parameterized for 1,4-dioxane. Note that reorganization energy is calculated as the energy gap between  $T_1$  energy level at the optimized  $S_1$  geometries and  $T_1$  energy level at the optimized  $T_1$  geometries for  $k_{ISC}$ . The temperature ( $T$ ) is taken as 298.15 K

(All parameters are listed in the Table S3). The geometries of the radical anionic form of organoPCs were also optimized at the level of unrestricted B3LYP-D3(BJ)/TZP with the COSMO parameterized for 1,4-dioxane, followed by single point calculations at the level of unrestricted w-B97X-D/TZP with TDA using the COSMO parameterized for 1,4-dioxane. The calculated oscillator strengths for first doublet excited state is used to estimate the molar absorbance of radical anion of catalysts to perform second-order kinetics analyses.

**Laser flash photolysis.** An Ar-saturated 1,4-dioxane solution in a quartz cell (path length = 1.0 cm) was excited by a Nd:YAG laser (EKSPLA, NT342) at a wavelength of 355 nm with 20 mJ pulse<sup>-1</sup>. No positive transient signal was observed for dopant-only solutions under the measurement conditions. Time courses of the transient absorption were measured using Hamamatsu, photomultiplier tube R2949/InGaAs photodiode as detectors. The output from the detectors was recorded with a Tektronix, TDS3032 digitized oscilloscope. All experiments were performed at 298 K. The decays of the positive  $\Delta\text{Abs}$  signals of  $\text{PC}^{\bullet-}$  were analyzed through a second-order kinetics model. Briefly, the molar absorbance ( $\epsilon$ ) of  $\text{PC}^{\bullet-}$  determined from the spectroelectrochemical measurement was divided by  $\Delta\text{Abs}$  values at 1400 nm. The  $\epsilon/\Delta\text{Abs}$  data were plotted as a function of delay time, and fit to a linear line. The slope (in M<sup>-1</sup> s<sup>-1</sup>) of the linear line corresponded to the  $k_{\text{CR}}$  value. The values were plotted as a function of  $-\Delta G_{\text{CR}}$ , and correlated with parabolic curves calculated from the Jortner equation for adiabatic outer-sphere electron transfer:

$$k_{\text{CR}} = \frac{2\pi}{\hbar} \frac{J^2}{\sqrt{4\pi\lambda_{\text{out}}k_{\text{B}}T}} \cdot \left( \sum_{n=0}^{\infty} \frac{1}{n!} \left( \frac{\lambda_{\text{in}}}{\hbar\omega} \right)^n \cdot \exp\left(-\frac{\lambda_{\text{in}}}{\hbar\omega}\right) \cdot \exp\left(-\frac{(\Delta G_{\text{CR}} + \lambda_{\text{in}} + n\hbar\omega)^2}{4\pi\lambda_{\text{out}}k_{\text{B}}T}\right) \right)$$

In this equation,  $J^2$  is taken as  $5.0 \times 10^{-5}$  eV,  $\hbar\omega$  is approximated 0.21 eV which is typical for C=C stretching in aromatic hydrocarbons,  $k_{\text{B}}$  is the Boltzmann constant, and  $T$  is 298 K.  $\lambda_{\text{out}}$  is estimated from the equation:

$$\lambda_{\text{out}} = \frac{e^2}{4\pi\epsilon_0} \cdot \left( \frac{1}{d_{\text{PC}}} + \frac{1}{d_1} - \frac{1}{d_{\text{vdW}}} \right) \cdot \left( \frac{1}{n^2} - \frac{1}{\epsilon} \right)$$

In this equation,  $e$  is elementary charge,  $\epsilon_0$  is the vacuum permittivity,  $d_{\text{PC}}$  is the mean diameter of an optimized geometry of PC,  $d_1$  is the mean diameter of **1**,  $d_{\text{vdW}}$  is the longest diameter of the optimized geometry of a van der Waals contact pair of PC and **1**,  $n$  is the refractive index of 1,4-dioxane, and  $\epsilon$  is the dielectric constant of 1,4-dioxane.

**Table S1.** Reaction yields and photochemical quantum yields determined at 17 h of reaction<sup>a</sup>

| photocatalyst | reaction yield after 17 h (%) | quantum yield (%) |
|---------------|-------------------------------|-------------------|
| <b>A</b>      | 94                            | 49                |
| <b>B</b>      | 14                            | 7                 |
| <b>C</b>      | 14                            | 7                 |
| <b>D</b>      | 7                             | 4                 |
| <b>E</b>      | 45                            | 23                |
| <b>F</b>      | 28                            | 15                |
| <b>G</b>      | 17                            | 9                 |
| <b>H</b>      | 93                            | 48                |

<sup>a</sup>Reaction scale: **1** (0.1 mmol), **2a** (0.5 mmol), photocatalyst (2.5  $\mu$ mol) in 1,4-dioxane under Ar (0.05 M reaction concentration irradiated under 450 nm).

**Table S2.** Calculated  $k_{ISC}$  values of **1**<sup>a</sup>

| <b>1</b>       | $ V_{SOC} ^2$ (eV <sup>2</sup> ) <sup>b</sup> | $\lambda$ (eV) <sup>c</sup> | $\Delta E_{ST}$ (eV) <sup>d</sup> | $k_{ISC}$ (s <sup>-1</sup> ) |
|----------------|-----------------------------------------------|-----------------------------|-----------------------------------|------------------------------|
| benzenoid form | $4.01 \times 10^{-7}$                         | 0.71                        | 0.43                              | $1.43 \times 10^2$           |
| quinoid form   | $5.13 \times 10^{-13}$                        | 0.09                        | 0.06                              | $2.74 \times 10^3$           |

<sup>a</sup>Calculated from the equation  $k_{ISC} = \frac{2\pi}{\hbar} |V_{SOC}|^2 \frac{1}{\sqrt{4\pi k_B T}} \exp\left[-\frac{(\Delta E_{ST} + \lambda)^2}{4\lambda k_B T}\right]$ . <sup>b</sup>The spin-orbit coupling matrix elements squared, evaluated at the optimized S<sub>1</sub> geometries and expressed in units of eV. <sup>c</sup>Reorganization energy calculated as the difference between the T<sub>1</sub> energy at the optimized S<sub>1</sub> geometry and the T<sub>1</sub> energy at the optimized T<sub>1</sub> geometry. <sup>d</sup>Adiabatic energy differences between the S<sub>1</sub> energy at the optimized S<sub>1</sub> geometry and the T<sub>1</sub> energy at the optimized T<sub>1</sub> geometry.

**Table S3.** Cartesian coordinate for the optimized ground state geometry of the benzenoid form of **1**

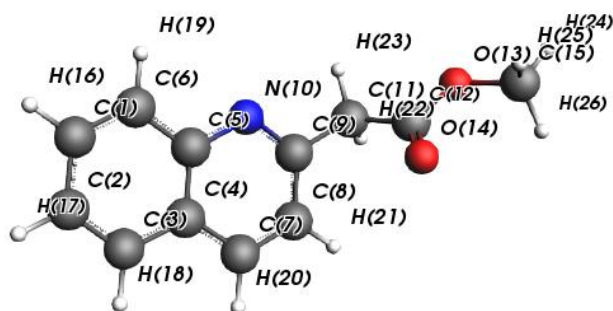

| label | atom | coordinates (Å) |         |         |
|-------|------|-----------------|---------|---------|
|       |      | x               | y       | z       |
| 1     | C    | -8.4919         | -3.6962 | 0.3611  |
| 2     | C    | -9.5806         | -3.1663 | -0.3676 |
| 3     | C    | -9.6262         | -1.8276 | -0.6675 |
| 4     | C    | -8.5846         | -0.965  | -0.252  |
| 5     | C    | -7.4867         | -1.4994 | 0.4824  |
| 6     | C    | -7.4675         | -2.8827 | 0.7783  |
| 7     | C    | -8.5692         | 0.4225  | -0.5276 |
| 8     | C    | -7.5226         | 1.1826  | -0.0893 |
| 9     | C    | -6.4708         | 0.5635  | 0.6346  |
| 10    | N    | -6.4501         | -0.7216 | 0.9119  |
| 11    | C    | -5.309          | 1.3851  | 1.1245  |
| 12    | C    | -4.3916         | 1.8534  | 0.0118  |
| 13    | O    | -3.2788         | 2.415   | 0.5231  |
| 14    | O    | -4.6113         | 1.7597  | -1.1743 |
| 15    | C    | -2.3304         | 2.9152  | -0.4488 |
| 16    | H    | -8.4689         | -4.7544 | 0.5905  |
| 17    | H    | -10.3796        | -3.8227 | -0.6887 |
| 18    | H    | -10.458         | -1.4144 | -1.2259 |
| 19    | H    | -6.6264         | -3.2728 | 1.3371  |
| 20    | H    | -9.3869         | 0.866   | -1.0836 |
| 21    | H    | -7.4788         | 2.2446  | -0.2907 |
| 22    | H    | -5.6584         | 2.2803  | 1.647   |
| 23    | H    | -4.7231         | 0.8052  | 1.836   |
| 24    | H    | -1.5108         | 3.3248  | 0.133   |
| 25    | H    | -1.9834         | 2.1036  | -1.085  |
| 26    | H    | -2.7922         | 3.6874  | -1.061  |

**Table S4.** Cartesian coordinate for the optimized S<sub>1</sub> state geometry of the benzenoid form of **1**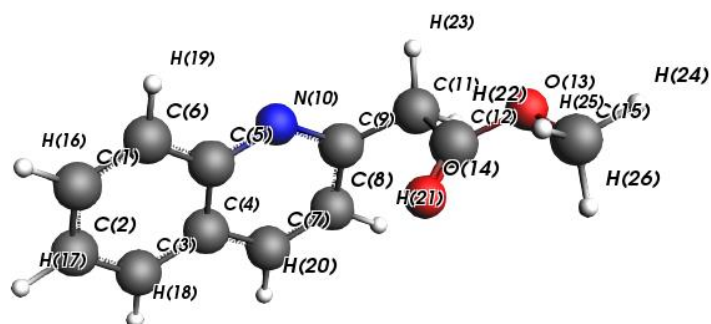

| label | atom | coordinates (Å) |          |          |
|-------|------|-----------------|----------|----------|
|       |      | x               | y        | z        |
| 1     | C    | -8.04124        | -3.59464 | -0.00467 |
| 2     | C    | -9.15982        | -3.13764 | -0.69107 |
| 3     | C    | -9.42852        | -1.77644 | -0.754   |
| 4     | C    | -8.59852        | -0.83425 | -0.15013 |
| 5     | C    | -7.44956        | -1.33375 | 0.566058 |
| 6     | C    | -7.18511        | -2.70468 | 0.629132 |
| 7     | C    | -8.80201        | 0.587306 | -0.17373 |
| 8     | C    | -7.87918        | 1.44628  | 0.368879 |
| 9     | C    | -6.74072        | 0.957065 | 1.025965 |
| 10    | N    | -6.76679        | -0.37549 | 1.191707 |
| 11    | C    | -5.49847        | 1.736889 | 1.270558 |
| 12    | C    | -4.50581        | 1.610225 | 0.127354 |
| 13    | O    | -3.39723        | 2.314822 | 0.386442 |
| 14    | O    | -4.68006        | 0.978626 | -0.88423 |
| 15    | C    | -2.40414        | 2.287587 | -0.65459 |
| 16    | H    | -7.83002        | -4.65636 | 0.043807 |
| 17    | H    | -9.82668        | -3.8415  | -1.17404 |
| 18    | H    | -10.3112        | -1.41406 | -1.27138 |
| 19    | H    | -6.30584        | -3.04394 | 1.161014 |
| 20    | H    | -9.65702        | 0.974263 | -0.71463 |
| 21    | H    | -7.95349        | 2.522028 | 0.240341 |
| 22    | H    | -5.742          | 2.79564  | 1.380043 |
| 23    | H    | -4.99488        | 1.425633 | 2.188959 |
| 24    | H    | -1.58278        | 2.900213 | -0.293   |
| 25    | H    | -2.07716        | 1.263098 | -0.83079 |
| 26    | H    | -2.81947        | 2.698681 | -1.57468 |

**Table S5.** Cartesian coordinate for the optimized T<sub>1</sub> state geometry of the benzenoid form of **1**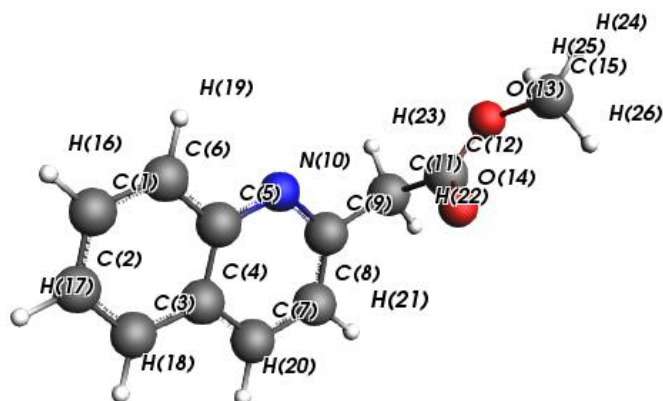

|    | atom | coordinates (Å) |         |         |
|----|------|-----------------|---------|---------|
|    |      | x               | y       | z       |
| 1  | C    | -8.0633         | -3.6519 | 0.0673  |
| 2  | C    | -9.28           | -3.2663 | -0.398  |
| 3  | C    | -9.6068         | -1.8643 | -0.5185 |
| 4  | C    | -8.6724         | -0.8717 | -0.1577 |
| 5  | C    | -7.3875         | -1.2746 | 0.3357  |
| 6  | C    | -7.095          | -2.6638 | 0.4444  |
| 7  | C    | -8.9301         | 0.4981  | -0.2511 |
| 8  | C    | -7.9189         | 1.4126  | 0.1391  |
| 9  | C    | -6.7246         | 0.9378  | 0.5949  |
| 10 | N    | -6.4454         | -0.4041 | 0.704   |
| 11 | C    | -5.603          | 1.841   | 1.0007  |
| 12 | C    | -4.4625         | 1.8045  | 0.0081  |
| 13 | O    | -3.3141         | 2.1961  | 0.5763  |
| 14 | O    | -4.561          | 1.5009  | -1.1553 |
| 15 | C    | -2.186          | 2.2491  | -0.3132 |
| 16 | H    | -7.8139         | -4.7019 | 0.1577  |
| 17 | H    | -10.0191        | -4.0046 | -0.6848 |
| 18 | H    | -10.5785        | -1.5649 | -0.8889 |
| 19 | H    | -6.1201         | -2.9454 | 0.8173  |
| 20 | H    | -9.8863         | 0.8455  | -0.6207 |
| 21 | H    | -8.0863         | 2.4808  | 0.0726  |
| 22 | H    | -5.939          | 2.8795  | 1.056   |
| 23 | H    | -5.2197         | 1.5587  | 1.9826  |
| 24 | H    | -1.3471         | 2.5772  | 0.2949  |
| 25 | H    | -1.997          | 1.2616  | -0.7338 |
| 26 | H    | -2.3801         | 2.9556  | -1.1204 |

**Table S6.** Cartesian coordinate for the optimized ground state geometry of the quinoid form of **1**

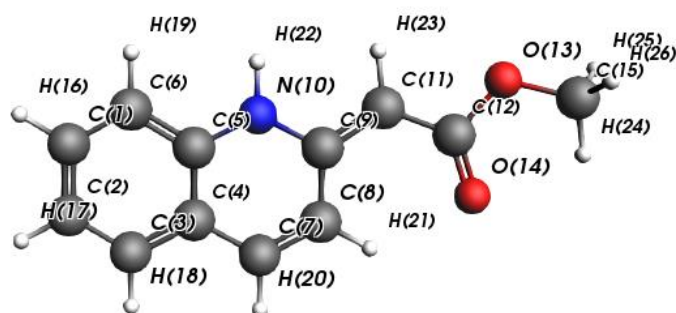

| label | atom | coordinates (Å) |          |          |
|-------|------|-----------------|----------|----------|
|       |      | <i>x</i>        | <i>y</i> | <i>z</i> |
| 1     | C    | -4.2052         | 0.6557   | -0.4842  |
| 2     | C    | -4.3687         | -0.6258  | 0.0563   |
| 3     | C    | -3.2567         | -1.3522  | 0.4432   |
| 4     | C    | -1.9667         | -0.8216  | 0.3009   |
| 5     | C    | -1.818          | 0.4707   | -0.2457  |
| 6     | C    | -2.9437         | 1.2051   | -0.6364  |
| 7     | C    | -0.7717         | -1.5213  | 0.6817   |
| 8     | C    | 0.4539          | -0.975   | 0.5274   |
| 9     | C    | 0.6191          | 0.3461   | -0.032   |
| 10    | N    | -0.5492         | 0.9871   | -0.3842  |
| 11    | C    | 1.8185          | 0.989    | -0.2325  |
| 12    | C    | 3.1116          | 0.4488   | 0.0878   |
| 13    | O    | 4.0907          | 1.3553   | -0.2456  |
| 14    | O    | 3.3759          | -0.6434  | 0.58     |
| 15    | C    | 5.4556          | 0.9777   | 0.0079   |
| 16    | H    | -5.0732         | 1.2272   | -0.788   |
| 17    | H    | -5.3604         | -1.0437  | 0.1698   |
| 18    | H    | -3.3676         | -2.3448  | 0.8628   |
| 19    | H    | -2.8199         | 2.1969   | -1.0548  |
| 20    | H    | -0.87           | -2.5148  | 1.1031   |
| 21    | H    | 1.354           | -1.4956  | 0.8111   |
| 22    | H    | -0.4668         | 1.9132   | -0.7779  |
| 23    | H    | 1.8098          | 1.9819   | -0.6637  |
| 24    | H    | 5.5002          | -0.0175  | 0.4405   |
| 25    | H    | 5.9928          | 1.0027   | -0.9395  |
| 26    | H    | 5.8853          | 1.7074   | 0.6933   |

**Table S7.** Cartesian coordinate for the optimized S<sub>1</sub> state geometry of the quinoid form of **1**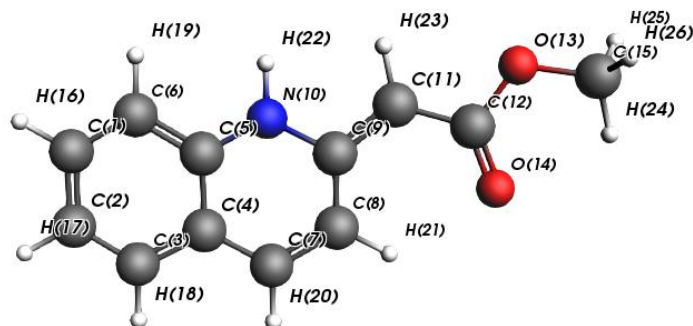

| label | atom | coordinates (Å) |          |          |
|-------|------|-----------------|----------|----------|
|       |      | <i>x</i>        | <i>y</i> | <i>z</i> |
| 1     | C    | -4.1666         | 0.714    | -0.504   |
| 2     | C    | -4.3623         | -0.5719  | 0.0401   |
| 3     | C    | -3.2983         | -1.3416  | 0.4417   |
| 4     | C    | -1.9648         | -0.8696  | 0.3222   |
| 5     | C    | -1.7925         | 0.4445   | -0.2366  |
| 6     | C    | -2.8868         | 1.2144   | -0.6394  |
| 7     | C    | -0.8304         | -1.5921  | 0.7083   |
| 8     | C    | 0.4593          | -1.0451  | 0.555    |
| 9     | C    | 0.6164          | 0.2212   | 0.0156   |
| 10    | N    | -0.522          | 0.9217   | -0.3634  |
| 11    | C    | 1.806           | 0.9317   | -0.2159  |
| 12    | C    | 3.1344          | 0.4472   | 0.0888   |
| 13    | O    | 4.061           | 1.3773   | -0.2563  |
| 14    | O    | 3.4099          | -0.6347  | 0.5826   |
| 15    | C    | 5.4414          | 1.0648   | -0.0264  |
| 16    | H    | -5.0176         | 1.3067   | -0.8151  |
| 17    | H    | -5.3706         | -0.9569  | 0.1422   |
| 18    | H    | -3.4591         | -2.329   | 0.8589   |
| 19    | H    | -2.7117         | 2.2011   | -1.0556  |
| 20    | H    | -0.9553         | -2.5818  | 1.1289   |
| 21    | H    | 1.3476          | -1.5827  | 0.8453   |
| 22    | H    | -0.3968         | 1.8433   | -0.7548  |
| 23    | H    | 1.7402          | 1.9215   | -0.6545  |
| 24    | H    | 5.5496          | 0.0562   | 0.3676   |
| 25    | H    | 5.9636          | 1.1575   | -0.9784  |
| 26    | H    | 5.8348          | 1.7913   | 0.6846   |



**Table S8.** Cartesian coordinate for the optimized T<sub>1</sub> state geometry of the quinoid form of **1**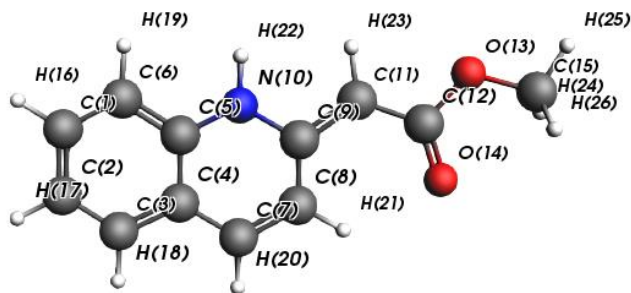

| label | atom | coordinates (Å) |         |         |
|-------|------|-----------------|---------|---------|
|       |      | x               | y       | z       |
| 1     | C    | -4.1948         | 0.6536  | -0.5349 |
| 2     | C    | -4.3684         | -0.5919 | 0.0822  |
| 3     | C    | -3.2774         | -1.3091 | 0.5193  |
| 4     | C    | -1.9628         | -0.8201 | 0.3616  |
| 5     | C    | -1.8111         | 0.4492  | -0.2694 |
| 6     | C    | -2.9221         | 1.1675  | -0.7076 |
| 7     | C    | -0.8131         | -1.5202 | 0.7948  |
| 8     | C    | 0.4665          | -0.9518 | 0.5976  |
| 9     | C    | 0.6116          | 0.2778  | -0.015  |
| 10    | N    | -0.5427         | 0.9521  | -0.4389 |
| 11    | C    | 1.8298          | 0.9575  | -0.2726 |
| 12    | C    | 3.1481          | 0.4783  | 0.0652  |
| 13    | O    | 4.0941          | 1.37    | -0.3179 |
| 14    | O    | 3.4249          | -0.5743 | 0.6178  |
| 15    | C    | 5.4405          | 0.9788  | -0.0247 |
| 16    | H    | -5.0542         | 1.2166  | -0.877  |
| 17    | H    | -5.3666         | -0.9918 | 0.2166  |
| 18    | H    | -3.4112         | -2.2732 | 0.9971  |
| 19    | H    | -2.7731         | 2.131   | -1.1837 |
| 20    | H    | -0.9201         | -2.483  | 1.2741  |
| 21    | H    | 1.366           | -1.4565 | 0.9171  |
| 22    | H    | -0.4394         | 1.8492  | -0.8827 |
| 23    | H    | 1.7876          | 1.9217  | -0.7644 |
| 24    | H    | 5.6846          | 0.0506  | -0.5426 |
| 25    | H    | 6.0666          | 1.7936  | -0.3794 |
| 26    | H    | 5.5665          | 0.8338  | 1.0488  |

**Table S9.** Cartesian coordinate for the optimized ground state geometry of A

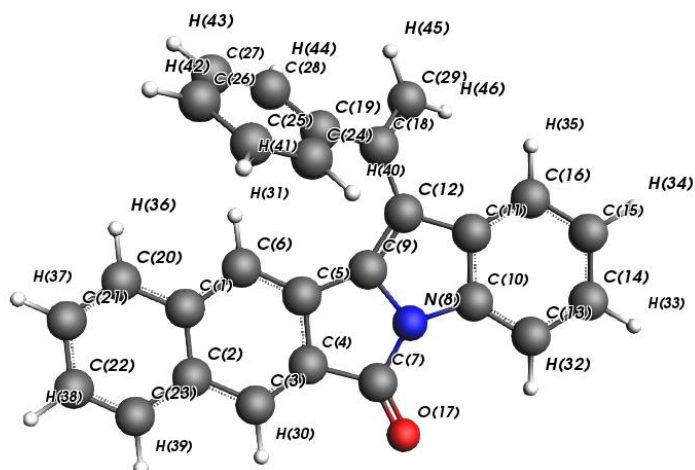

| label | atom | coordinates (Å) |         |         |
|-------|------|-----------------|---------|---------|
|       |      | x               | y       | z       |
| 1     | C    | -2.7187         | -1.1796 | 0.3749  |
| 2     | C    | -2.5675         | -2.5642 | 0.7133  |
| 3     | C    | -1.2757         | -3.1527 | 0.665   |
| 4     | C    | -0.2127         | -2.3808 | 0.3032  |
| 5     | C    | -0.3539         | -0.9965 | -0.0366 |
| 6     | C    | -1.5891         | -0.4071 | -0.0062 |
| 7     | C    | 1.217           | -2.7731 | 0.1848  |
| 8     | N    | 1.8545          | -1.595  | -0.2157 |
| 9     | C    | 0.978           | -0.5062 | -0.361  |
| 10    | C    | 3.151           | -1.2058 | -0.5226 |
| 11    | C    | 3.084           | 0.1659  | -0.8757 |
| 12    | C    | 1.6889          | 0.5944  | -0.7744 |
| 13    | C    | 4.3376          | -1.923  | -0.4948 |
| 14    | C    | 5.4998          | -1.2346 | -0.8291 |
| 15    | C    | 5.4659          | 0.1252  | -1.165  |
| 16    | C    | 4.2696          | 0.8336  | -1.1892 |
| 17    | O    | 1.7584          | -3.8454 | 0.376   |
| 18    | C    | 1.1663          | 1.9342  | -1.07   |
| 19    | C    | 0.0818          | 2.4616  | -0.2017 |
| 20    | C    | -4.01           | -0.6035 | 0.4345  |
| 21    | C    | -5.0997         | -1.3537 | 0.8047  |
| 22    | C    | -4.95           | -2.7179 | 1.134   |
| 23    | C    | -3.7102         | -3.3081 | 1.0886  |
| 24    | C    | 0.1092          | 2.2468  | 1.1802  |
| 25    | C    | -0.9133         | 2.7207  | 1.9923  |
| 26    | C    | -1.9875         | 3.4106  | 1.4363  |
| 27    | C    | -2.0252         | 3.6317  | 0.0622  |
| 28    | C    | -0.9985         | 3.1621  | -0.7494 |
| 29    | C    | 1.6538          | 2.6638  | -2.0842 |

|    |   |         |         |         |
|----|---|---------|---------|---------|
| 30 | H | -1.142  | -4.198  | 0.9155  |
| 31 | H | -1.7279 | 0.6338  | -0.2569 |
| 32 | H | 4.3496  | -2.9679 | -0.2196 |
| 33 | H | 6.4475  | -1.7579 | -0.8206 |
| 34 | H | 6.3903  | 0.6341  | -1.4071 |
| 35 | H | 4.2622  | 1.8859  | -1.4379 |
| 36 | H | -4.1233 | 0.4447  | 0.1849  |
| 37 | H | -6.0813 | -0.8984 | 0.8461  |
| 38 | H | -5.8172 | -3.2979 | 1.4237  |
| 39 | H | -3.5905 | -4.3546 | 1.3422  |
| 40 | H | 0.9328  | 1.6969  | 1.6163  |
| 41 | H | -0.8755 | 2.5454  | 3.0602  |
| 42 | H | -2.791  | 3.7682  | 2.068   |
| 43 | H | -2.8611 | 4.1591  | -0.3805 |
| 44 | H | -1.0485 | 3.3077  | -1.8208 |
| 45 | H | 1.2974  | 3.6681  | -2.2705 |
| 46 | H | 2.4092  | 2.2723  | -2.7508 |

**Table S10.** Cartesian coordinate for the optimized ground state geometry of **B**

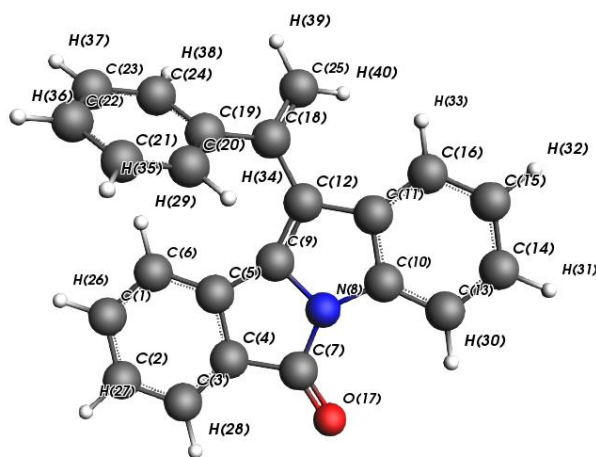

| label | atom | coordinates (Å) |         |         |
|-------|------|-----------------|---------|---------|
|       |      | x               | y       | z       |
| 1     | C    | -4.0651         | -2.137  | 0.4086  |
| 2     | C    | -3.8125         | -3.4481 | 0.0038  |
| 3     | C    | -2.5011         | -3.8905 | -0.1757 |
| 4     | C    | -1.4752         | -2.9958 | 0.0627  |
| 5     | C    | -1.7221         | -1.6693 | 0.477   |
| 6     | C    | -3.0295         | -1.2326 | 0.6492  |
| 7     | C    | -0.0078         | -3.2117 | -0.0637 |
| 8     | N    | 0.5428          | -1.9763 | 0.2924  |

S-19

|    |   |         |         |         |
|----|---|---------|---------|---------|
| 9  | C | -0.426  | -1.0184 | 0.6281  |
| 10 | C | 1.813   | -1.4214 | 0.3882  |
| 11 | C | 1.6311  | -0.0743 | 0.7913  |
| 12 | C | 0.194   | 0.1671  | 0.9338  |
| 13 | C | 3.0619  | -1.9848 | 0.1799  |
| 14 | C | 4.1678  | -1.1651 | 0.3909  |
| 15 | C | 4.0182  | 0.1635  | 0.8071  |
| 16 | C | 2.7587  | 0.7172  | 1.0127  |
| 17 | O | 0.6155  | -4.2012 | -0.3967 |
| 18 | C | -0.44   | 1.4342  | 1.3193  |
| 19 | C | -1.6146 | 1.375   | 2.2268  |
| 20 | C | -1.649  | 0.4621  | 3.2863  |
| 21 | C | -2.7451 | 0.4039  | 4.1378  |
| 22 | C | -3.8324 | 1.2507  | 3.9393  |
| 23 | C | -3.8111 | 2.1612  | 2.8861  |
| 24 | C | -2.7112 | 2.2234  | 2.0382  |
| 25 | C | 0.0336  | 2.6078  | 0.8758  |
| 26 | H | -5.0892 | -1.8109 | 0.5407  |
| 27 | H | -4.6391 | -4.1238 | -0.1736 |
| 28 | H | -2.284  | -4.9023 | -0.4929 |
| 29 | H | -3.2481 | -0.2236 | 0.9642  |
| 30 | H | 3.1641  | -3.0156 | -0.1279 |
| 31 | H | 5.1614  | -1.5665 | 0.2374  |
| 32 | H | 4.8997  | 0.7692  | 0.9744  |
| 33 | H | 2.6582  | 1.741   | 1.346   |
| 34 | H | -0.8117 | -0.2059 | 3.44    |
| 35 | H | -2.7528 | -0.3069 | 4.9548  |
| 36 | H | -4.6917 | 1.1974  | 4.5961  |
| 37 | H | -4.6571 | 2.8158  | 2.717   |
| 38 | H | -2.7121 | 2.9134  | 1.2042  |
| 39 | H | -0.4059 | 3.5436  | 1.1941  |
| 40 | H | 0.8607  | 2.6572  | 0.1817  |

---

**Table S11.** Cartesian coordinate for the optimized ground state geometry of C

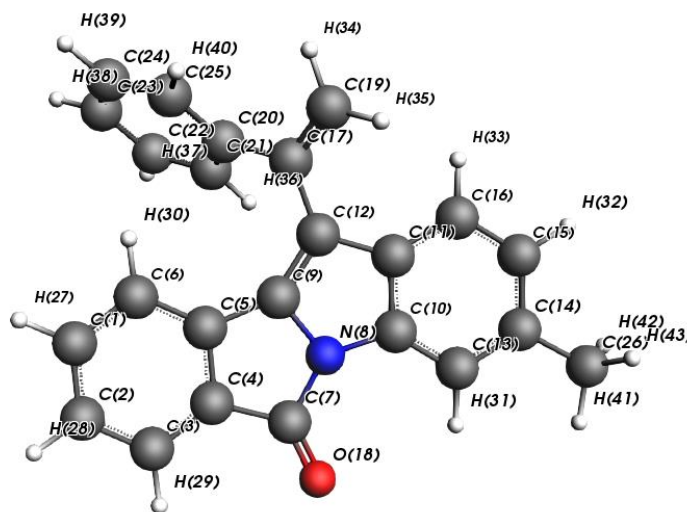

| label | atom | coordinates (Å) |         |         |
|-------|------|-----------------|---------|---------|
|       |      | x               | y       | z       |
| 1     | C    | -3.8542         | -1.4853 | 0.6434  |
| 2     | C    | -3.7324         | -2.8538 | 0.3986  |
| 3     | C    | -2.4817         | -3.4141 | 0.1362  |
| 4     | C    | -1.3832         | -2.5754 | 0.1246  |
| 5     | C    | -1.498          | -1.1892 | 0.3671  |
| 6     | C    | -2.7454         | -0.6375 | 0.6322  |
| 7     | C    | 0.0443          | -2.9207 | -0.1154 |
| 8     | N    | 0.7068          | -1.695  | -0.0047 |
| 9     | C    | -0.1566         | -0.6252 | 0.2791  |
| 10    | C    | 2.0177          | -1.2414 | -0.0813 |
| 11    | C    | 1.9731          | 0.1509  | 0.1681  |
| 12    | C    | 0.5783          | 0.5287  | 0.4007  |
| 13    | C    | 3.191           | -1.9252 | -0.3605 |
| 14    | C    | 4.3793          | -1.1958 | -0.4019 |
| 15    | C    | 4.3475          | 0.1924  | -0.1745 |
| 16    | C    | 3.1683          | 0.87    | 0.1053  |
| 17    | C    | 0.0842          | 1.8757  | 0.7125  |
| 18    | O    | 0.5657          | -3.9936 | -0.3527 |
| 19    | C    | 0.7778          | 2.7001  | 1.5113  |
| 20    | C    | -1.2028         | 2.3018  | 0.1042  |
| 21    | C    | -1.5153         | 1.9541  | -1.2143 |
| 22    | C    | -2.7191         | 2.3463  | -1.7858 |
| 23    | C    | -3.6384         | 3.0852  | -1.0454 |
| 24    | C    | -3.3396         | 3.4353  | 0.2688  |
| 25    | C    | -2.1321         | 3.0475  | 0.8382  |
| 26    | C    | 5.6884          | -1.8799 | -0.6967 |
| 27    | H    | -4.8327         | -1.0681 | 0.8464  |
| 28    | H    | -4.6133         | -3.4825 | 0.4142  |

|    |   |         |         |         |
|----|---|---------|---------|---------|
| 29 | H | -2.3648 | -4.4736 | -0.0525 |
| 30 | H | -2.8645 | 0.4186  | 0.8211  |
| 31 | H | 3.1771  | -2.9907 | -0.544  |
| 32 | H | 5.2758  | 0.7494  | -0.2234 |
| 33 | H | 3.1795  | 1.9401  | 0.2617  |
| 34 | H | 0.4336  | 3.7064  | 1.7091  |
| 35 | H | 1.6942  | 2.3845  | 1.9899  |
| 36 | H | -0.8104 | 1.3701  | -1.7913 |
| 37 | H | -2.9428 | 2.0705  | -2.8088 |
| 38 | H | -4.582  | 3.3808  | -1.4868 |
| 39 | H | -4.0533 | 4.0001  | 0.8559  |
| 40 | H | -1.918  | 3.2963  | 1.8697  |
| 41 | H | 5.5484  | -2.9477 | -0.8617 |
| 42 | H | 6.1587  | -1.4566 | -1.5874 |
| 43 | H | 6.3906  | -1.7532 | 0.1309  |

**Table S12.** Cartesian coordinate for the optimized ground state geometry of **D**

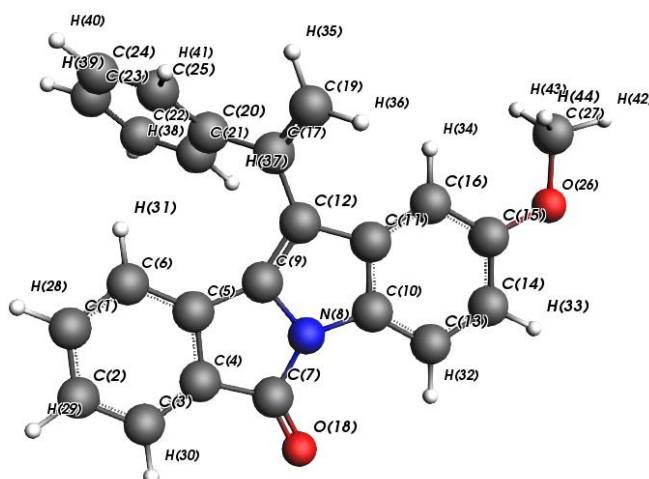

| label | atom | coordinates (Å) |         |         |
|-------|------|-----------------|---------|---------|
|       |      | x               | y       | z       |
| 1     | C    | -3.8911         | -1.9854 | 0.7081  |
| 2     | C    | -3.7673         | -3.3431 | 0.3435  |
| 3     | C    | -2.5207         | -3.8706 | -0.0335 |
| 4     | C    | -1.4258         | -3.0108 | -0.044  |
| 5     | C    | -1.5439         | -1.6661 | 0.2984  |
| 6     | C    | -2.7726         | -1.1332 | 0.693   |
| 7     | C    | -0.0131         | -3.2502 | -0.3537 |
| 8     | N    | 0.647           | -2.0748 | -0.1906 |
| 9     | C    | -0.1899         | -1.1023 | 0.1657  |
| 10    | C    | 1.8852          | -1.5773 | -0.2702 |
| 11    | C    | 1.8454          | -0.2304 | 0.0444  |

|    |   |         |         |         |
|----|---|---------|---------|---------|
| 12 | C | 0.5021  | 0.1066  | 0.3211  |
| 13 | C | 3.0634  | -2.2353 | -0.6052 |
| 14 | C | 4.247   | -1.4812 | -0.6254 |
| 15 | C | 4.2378  | -0.1003 | -0.322  |
| 16 | C | 3.0152  | 0.5377  | 0.0152  |
| 17 | C | -0.0518 | 1.4424  | 0.7038  |
| 18 | O | 0.5054  | -4.3062 | -0.6794 |
| 19 | C | 0.6665  | 2.2109  | 1.5473  |
| 20 | C | -1.3663 | 1.9245  | 0.1468  |
| 21 | C | -1.8891 | 1.3505  | -1.0344 |
| 22 | C | -3.1004 | 1.7904  | -1.5746 |
| 23 | C | -3.8142 | 2.8134  | -0.9533 |
| 24 | C | -3.3155 | 3.4025  | 0.2074  |
| 25 | C | -2.1031 | 2.9696  | 0.7531  |
| 26 | O | 5.4184  | 0.5694  | -0.3707 |
| 27 | C | 5.5962  | 1.9117  | -0.1072 |
| 28 | H | -4.856  | -1.5967 | 1.0068  |
| 29 | H | -4.6377 | -3.9858 | 0.3634  |
| 30 | H | -2.4147 | -4.9136 | -0.3014 |
| 31 | H | -2.8792 | -0.1019 | 0.9886  |
| 32 | H | 3.0718  | -3.2905 | -0.8442 |
| 33 | H | 5.1789  | -1.9682 | -0.8838 |
| 34 | H | 2.9859  | 1.5935  | 0.2345  |
| 35 | H | 0.3537  | 3.1984  | 1.8583  |
| 36 | H | 1.6032  | 1.8651  | 1.9685  |
| 37 | H | -1.362  | 0.5644  | -1.5562 |
| 38 | H | -3.4845 | 1.3373  | -2.4794 |
| 39 | H | -4.7526 | 3.152   | -1.3731 |
| 40 | H | -3.8705 | 4.1978  | 0.6883  |
| 41 | H | -1.7687 | 3.4539  | 1.6579  |
| 42 | H | 6.6694  | 2.1653  | -0.2274 |
| 43 | H | 5.0056  | 2.5248  | -0.8208 |
| 44 | H | 5.2927  | 2.1416  | 0.9364  |

---

**Table S13.** Cartesian coordinate for the optimized ground state geometry of **E**

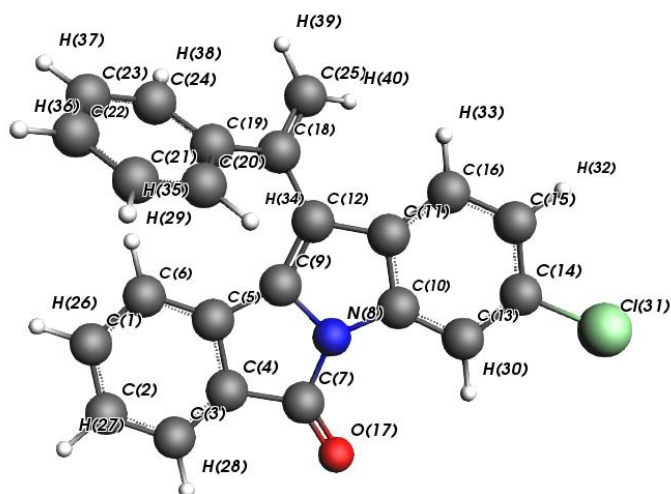

| label | atom | coordinates (Å) |         |         |
|-------|------|-----------------|---------|---------|
|       |      | x               | y       | z       |
| 1     | C    | -4.0629         | -2.1352 | 0.4077  |
| 2     | C    | -3.8105         | -3.4465 | 0.0028  |
| 3     | C    | -2.4996         | -3.8902 | -0.1755 |
| 4     | C    | -1.4731         | -2.9955 | 0.0618  |
| 5     | C    | -1.72           | -1.668  | 0.4734  |
| 6     | C    | -3.0271         | -1.231  | 0.6474  |
| 7     | C    | -0.0063         | -3.2131 | -0.0633 |
| 8     | N    | 0.5447          | -1.9748 | 0.2924  |
| 9     | C    | -0.4252         | -1.0162 | 0.6251  |
| 10    | C    | 1.8117          | -1.4197 | 0.3878  |
| 11    | C    | 1.6298          | -0.0718 | 0.7892  |
| 12    | C    | 0.1941          | 0.1694  | 0.9321  |
| 13    | C    | 3.0572          | -1.9903 | 0.1807  |
| 14    | C    | 4.1508          | -1.1612 | 0.3976  |
| 15    | C    | 4.0205          | 0.1673  | 0.8105  |
| 16    | C    | 2.7592          | 0.7156  | 1.0102  |
| 17    | O    | 0.6198          | -4.2003 | -0.3939 |
| 18    | C    | -0.4395         | 1.4367  | 1.3194  |
| 19    | C    | -1.6131         | 1.3762  | 2.2284  |
| 20    | C    | -1.6475         | 0.4602  | 3.2852  |
| 21    | C    | -2.7425         | 0.4011  | 4.1381  |
| 22    | C    | -3.8298         | 1.2485  | 3.9422  |
| 23    | C    | -3.8099         | 2.16    | 2.8898  |
| 24    | C    | -2.7108         | 2.2237  | 2.041   |
| 25    | C    | 0.0304          | 2.6092  | 0.8693  |
| 26    | H    | -5.0869         | -1.809  | 0.5399  |
| 27    | H    | -4.6375         | -4.1217 | -0.175  |
| 28    | H    | -2.2833         | -4.9024 | -0.4921 |



|    |    |         |         |         |
|----|----|---------|---------|---------|
| 29 | H  | -3.2447 | -0.2218 | 0.9632  |
| 30 | H  | 3.1688  | -3.0195 | -0.1245 |
| 31 | Cl | 5.7668  | -1.816  | 0.156   |
| 32 | H  | 4.9078  | 0.7615  | 0.9767  |
| 33 | H  | 2.665   | 1.7398  | 1.3435  |
| 34 | H  | -0.8106 | -0.2087 | 3.437   |
| 35 | H  | -2.7496 | -0.3113 | 4.9536  |
| 36 | H  | -4.6883 | 1.1943  | 4.6     |
| 37 | H  | -4.6564 | 2.8145  | 2.7224  |
| 38 | H  | -2.7136 | 2.9136  | 1.207   |
| 39 | H  | -0.4114 | 3.5455  | 1.1826  |
| 40 | H  | 0.8524  | 2.6571  | 0.1689  |

**Table S14.** Cartesian coordinate for the optimized ground state geometry of **F**

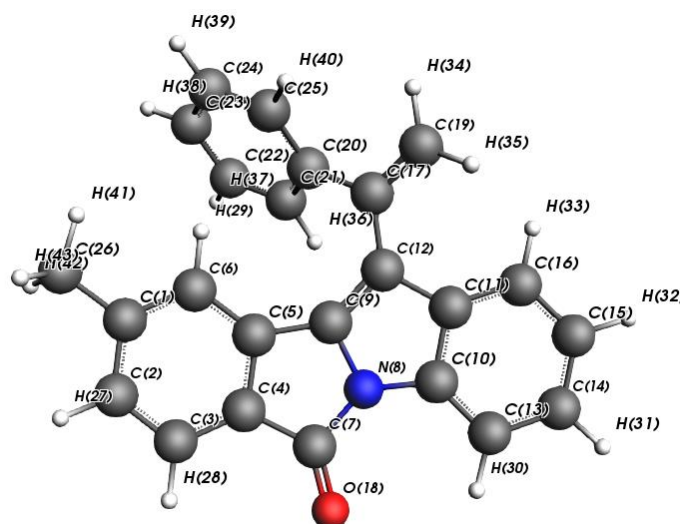

| label | atom | coordinates (Å) |         |         |
|-------|------|-----------------|---------|---------|
|       |      | x               | y       | z       |
| 1     | C    | 1.985           | 2.1704  | -0.1951 |
| 2     | C    | 1.6293          | 3.3189  | -0.9432 |
| 3     | C    | 0.3001          | 3.5325  | -1.3446 |
| 4     | C    | -0.6485         | 2.5774  | -0.9944 |
| 5     | C    | -0.3102         | 1.4358  | -0.2746 |
| 6     | C    | 1.0013          | 1.218   | 0.1495  |
| 7     | C    | -2.0941         | 2.5206  | -1.2316 |
| 8     | N    | -2.5581         | 1.3785  | -0.662  |
| 9     | C    | -1.5659         | 0.6849  | -0.1069 |
| 10    | C    | -3.7073         | 0.7221  | -0.475  |
| 11    | C    | -3.4452         | -0.4434 | 0.2268  |
| 12    | C    | -2.0552         | -0.4967 | 0.4676  |
| 13    | C    | -4.9892         | 1.0809  | -0.8847 |

|    |   |         |         |         |
|----|---|---------|---------|---------|
| 14 | C | -6.0414 | 0.2061  | -0.568  |
| 15 | C | -5.7903 | -0.9915 | 0.1353  |
| 16 | C | -4.4844 | -1.3292 | 0.5368  |
| 17 | C | -1.2856 | -1.563  | 1.1809  |
| 18 | O | -2.7828 | 3.3443  | -1.8124 |
| 19 | C | -1.8401 | -2.1243 | 2.2741  |
| 20 | C | 0.0625  | -2.0127 | 0.6801  |
| 21 | C | 0.4382  | -1.7691 | -0.6607 |
| 22 | C | 1.6794  | -2.1862 | -1.1485 |
| 23 | C | 2.5702  | -2.8585 | -0.314  |
| 24 | C | 2.2194  | -3.1198 | 1.0096  |
| 25 | C | 0.9785  | -2.7076 | 1.5049  |
| 26 | C | 3.4106  | 1.9784  | 0.2293  |
| 27 | H | 2.3832  | 4.0509  | -1.2053 |
| 28 | H | 0.0224  | 4.4158  | -1.9046 |
| 29 | H | 1.2628  | 0.3495  | 0.7326  |
| 30 | H | -5.172  | 1.9978  | -1.4292 |
| 31 | H | -7.0514 | 0.4498  | -0.8707 |
| 32 | H | -6.6104 | -1.6595 | 0.3644  |
| 33 | H | -4.3109 | -2.2575 | 1.0606  |
| 34 | H | -1.3654 | -2.9171 | 2.8361  |
| 35 | H | -2.8005 | -1.7951 | 2.6533  |
| 36 | H | -0.2271 | -1.263  | -1.3458 |
| 37 | H | 1.9491  | -1.9889 | -2.178  |
| 38 | H | 3.5313  | -3.18   | -0.6938 |
| 39 | H | 2.9119  | -3.6433 | 1.6563  |
| 40 | H | 0.7626  | -2.927  | 2.5394  |
| 41 | H | 3.5421  | 1.0385  | 0.8069  |
| 42 | H | 4.0633  | 1.9324  | -0.6677 |
| 43 | H | 3.728   | 2.8301  | 0.8669  |

---

**Table S15.** Cartesian coordinate for the optimized ground state geometry of **G**

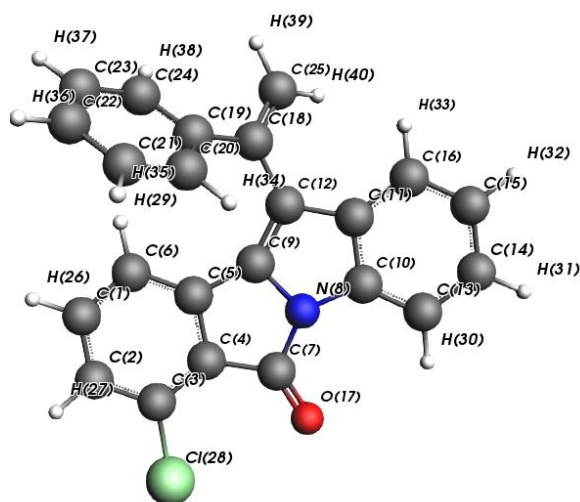

| label | atom | coordinates (Å) |          |          |
|-------|------|-----------------|----------|----------|
|       |      | <i>x</i>        | <i>y</i> | <i>z</i> |
| 1     | C    | -4.0567         | -2.1222  | 0.3898   |
| 2     | C    | -3.8211         | -3.4345  | -0.0077  |
| 3     | C    | -2.5115         | -3.8845  | -0.1772  |
| 4     | C    | -1.4571         | -3.0177  | 0.0552   |
| 5     | C    | -1.7115         | -1.6851  | 0.4629   |
| 6     | C    | -3.0115         | -1.2307  | 0.6296   |
| 7     | C    | 0.0177          | -3.2253  | -0.058   |
| 8     | N    | 0.5527          | -1.983   | 0.3001   |
| 9     | C    | -0.4204         | -1.0302  | 0.6229   |
| 10    | C    | 1.8199          | -1.4225  | 0.4007   |
| 11    | C    | 1.6287          | -0.0747  | 0.7971   |
| 12    | C    | 0.1905          | 0.1607   | 0.9302   |
| 13    | C    | 3.0731          | -1.9805  | 0.2024   |
| 14    | C    | 4.1727          | -1.154   | 0.418    |
| 15    | C    | 4.0139          | 0.1758   | 0.8283   |
| 16    | C    | 2.7508          | 0.724    | 1.0233   |
| 17    | O    | 0.6617          | -4.2017  | -0.3803  |
| 18    | C    | -0.4487         | 1.4275   | 1.309    |
| 19    | C    | -1.6183         | 1.371    | 2.2231   |
| 20    | C    | -1.6449         | 0.4635   | 3.2874   |
| 21    | C    | -2.7383         | 0.4044   | 4.1424   |
| 22    | C    | -3.8294         | 1.2465   | 3.9438   |
| 23    | C    | -3.8147         | 2.1532   | 2.8872   |
| 24    | C    | -2.7181         | 2.2155   | 2.035    |
| 25    | C    | 0.0177          | 2.5992   | 0.8529   |
| 26    | H    | -5.0791         | -1.7896  | 0.5155   |
| 27    | H    | -4.6438         | -4.112   | -0.1883  |
| 28    | Cl   | -2.2472         | -5.5386  | -0.6807  |

|    |   |         |         |         |
|----|---|---------|---------|---------|
| 29 | H | -3.2154 | -0.2179 | 0.9406  |
| 30 | H | 3.1829  | -3.0118 | -0.1005 |
| 31 | H | 5.1695  | -1.5509 | 0.2732  |
| 32 | H | 4.8914  | 0.7862  | 0.9995  |
| 33 | H | 2.6422  | 1.7486  | 1.3517  |
| 34 | H | -0.8039 | -0.1998 | 3.4421  |
| 35 | H | -2.7409 | -0.3029 | 4.9623  |
| 36 | H | -4.6859 | 1.1933  | 4.6042  |
| 37 | H | -4.6632 | 2.8049  | 2.7191  |
| 38 | H | -2.7239 | 2.9023  | 1.1983  |
| 39 | H | -0.4274 | 3.5354  | 1.162   |
| 40 | H | 0.8443  | 2.6461  | 0.158   |

**Table S16.** Cartesian coordinate for the optimized ground state geometry of **H**

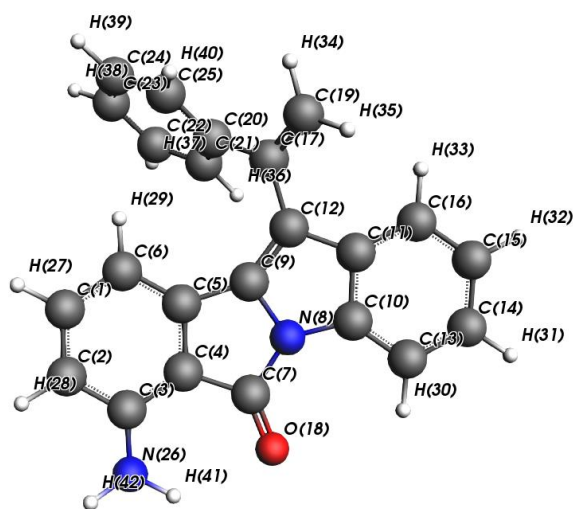

| label | atom | coordinates (Å) |        |         |
|-------|------|-----------------|--------|---------|
|       |      | x               | y      | z       |
| 1     | C    | 1.9241          | 2.1253 | 0.1506  |
| 2     | C    | 1.5908          | 3.2929 | -0.5643 |
| 3     | C    | 0.2755          | 3.508  | -1.0223 |
| 4     | C    | -0.679          | 2.5171 | -0.7502 |
| 5     | C    | -0.341          | 1.3533 | -0.0574 |
| 6     | C    | 0.9551          | 1.145  | 0.4148  |
| 7     | C    | -2.12           | 2.4221 | -1.043  |
| 8     | N    | -2.5683         | 1.2472 | -0.5315 |
| 9     | C    | -1.5787         | 0.5624 | 0.0352  |
| 10    | C    | -3.7046         | 0.5532 | -0.4116 |

|    |   |         |         |         |
|----|---|---------|---------|---------|
| 11 | C | -3.4353 | -0.6291 | 0.2578  |
| 12 | C | -2.0544 | -0.6527 | 0.5486  |
| 13 | C | -4.9805 | 0.8912  | -0.8565 |
| 14 | C | -6.018  | -0.023  | -0.6106 |
| 15 | C | -5.7585 | -1.238  | 0.0589  |
| 16 | C | -4.459  | -1.5539 | 0.4972  |
| 17 | C | -1.2832 | -1.7244 | 1.2515  |
| 18 | O | -2.8203 | 3.2396  | -1.6179 |
| 19 | C | -1.8607 | -2.3347 | 2.3059  |
| 20 | C | 0.0902  | -2.1278 | 0.7802  |
| 21 | C | 0.5054  | -1.8241 | -0.5364 |
| 22 | C | 1.7697  | -2.1996 | -0.9981 |
| 23 | C | 2.645   | -2.8889 | -0.1611 |
| 24 | C | 2.2559  | -3.2087 | 1.1387  |
| 25 | C | 0.9918  | -2.8384 | 1.6077  |
| 26 | N | -0.0522 | 4.6941  | -1.7258 |
| 27 | H | 2.9374  | 1.9843  | 0.5037  |
| 28 | H | 2.3582  | 4.0334  | -0.7516 |
| 29 | H | 1.2233  | 0.2648  | 0.9763  |
| 30 | H | -5.1699 | 1.8219  | -1.3747 |
| 31 | H | -7.0229 | 0.2037  | -0.9424 |
| 32 | H | -6.5668 | -1.9361 | 0.2334  |
| 33 | H | -4.2777 | -2.4953 | 0.9945  |
| 34 | H | -1.3874 | -3.1357 | 2.8573  |
| 35 | H | -2.8407 | -2.0395 | 2.6624  |
| 36 | H | -0.1464 | -1.3034 | -1.2236 |
| 37 | H | 2.0693  | -1.957  | -2.0095 |
| 38 | H | 3.624   | -3.1783 | -0.5207 |
| 39 | H | 2.9365  | -3.7452 | 1.7873  |
| 40 | H | 0.7463  | -3.1031 | 2.6248  |
| 41 | H | -1.0061 | 4.87    | -2.0679 |
| 42 | H | 0.6686  | 5.4071  | -1.9099 |

---

**Table S17.** Calculated spin densities in the optimized geometries of the ground state, the radical cation, and the triplet state of **1**

| label <sup>a</sup> | atom | spin density |                |               |
|--------------------|------|--------------|----------------|---------------|
|                    |      | ground state | radical cation | triplet state |
| 1                  | C    | 0.0938       | -0.0049        | 0.0937        |
| 2                  | C    | 0.0049       | 0.1112         | 0.0049        |
| 3                  | C    | 0.0728       | -0.0654        | 0.0728        |
| 4                  | C    | 0.0063       | 0.1173         | 0.0063        |
| 5                  | C    | 0.0445       | 0.0272         | 0.0444        |
| 6                  | C    | 0.0142       | 0.0334         | 0.0142        |
| 7                  | C    | 0.1723       | -0.055         | 0.1724        |
| 8                  | C    | 0.1021       | 0.1539         | 0.102         |
| 9                  | C    | 0.0061       | -0.1461        | 0.0062        |
| 10                 | N    | 0.1076       | 0.146          | 0.1077        |
| 11                 | C    | 0.3501       | 0.6652         | 0.35          |
| 12                 | C    | -0.0053      | -0.0499        | -0.0054       |
| 13                 | O    | 0.02         | 0.0295         | 0.02          |
| 14                 | O    | 0.0618       | 0.0842         | 0.0619        |
| 15                 | C    | -0.0018      | -0.0025        | -0.0018       |
| 16                 | H    | -0.0062      | -0.0001        | -0.0062       |
| 17                 | H    | -0.0005      | -0.0064        | -0.0005       |
| 18                 | H    | -0.0046      | 0.0027         | -0.0046       |
| 19                 | H    | -0.0015      | -0.0024        | -0.0015       |
| 20                 | H    | -0.0118      | 0.0023         | -0.0118       |
| 21                 | H    | -0.0063      | -0.008         | -0.0063       |
| 22                 | H    | -0.0042      | -0.0062        | -0.0042       |
| 23                 | H    | -0.0181      | -0.0319        | -0.0181       |
| 24                 | H    | 0.0018       | 0.0028         | 0.0018        |
| 25                 | H    | 0.0002       | 0.0003         | 0.0002        |
| 26                 | H    | 0.0018       | 0.0027         | 0.0018        |

<sup>a</sup>Refer to Table S3 for labels

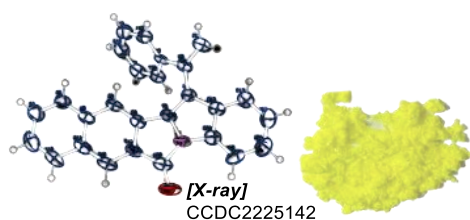

**Figure S1. X-ray crystal structure of A.** Oak Ridge Thermal Ellipsoid Plot (ORTEP) drawing at the 50% probability level and their image of yellow powder.

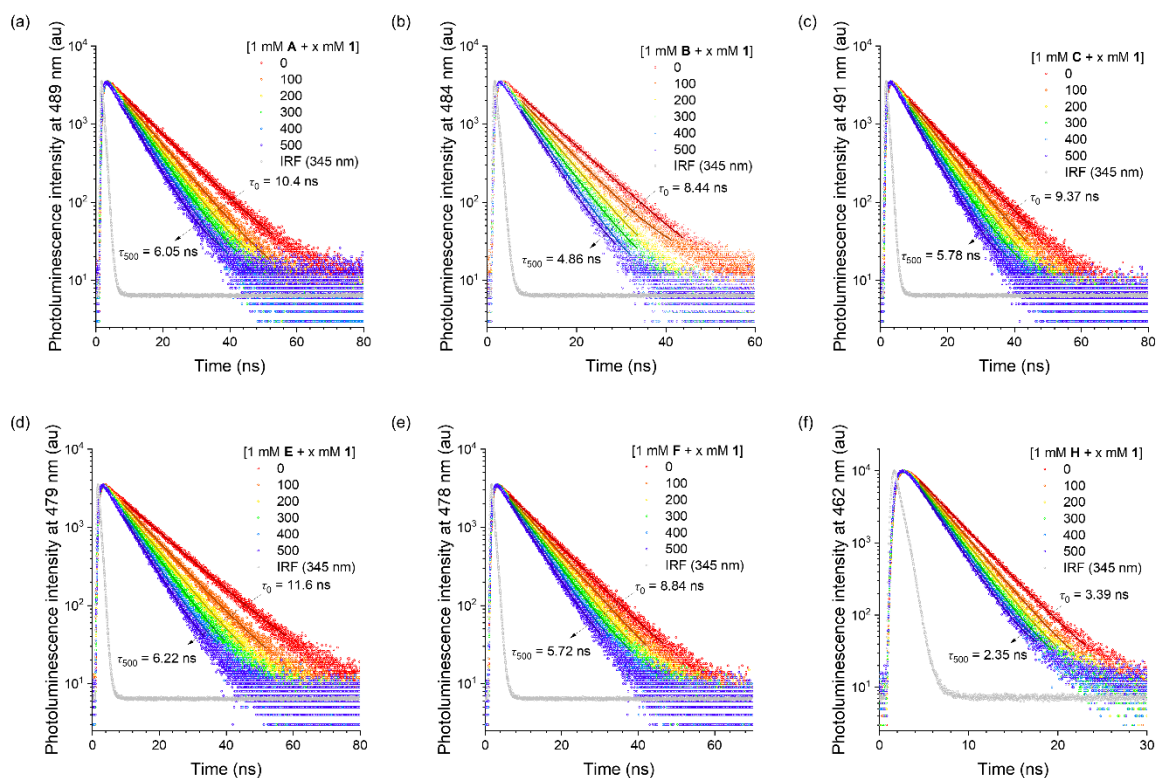

**Figure S2. Photoluminescence quenching.** Photoluminescence decay traces of 1.0 mM organoPCs monitored after picosecond pulsed laser photoexcitation (temporal resolution = 0.025 ns) at 345 nm with increased concentrations of **1** (0–500 mM) in 1,4-dioxane. Solid curves are nonlinear least-squares fits to a monoexponential decay model.

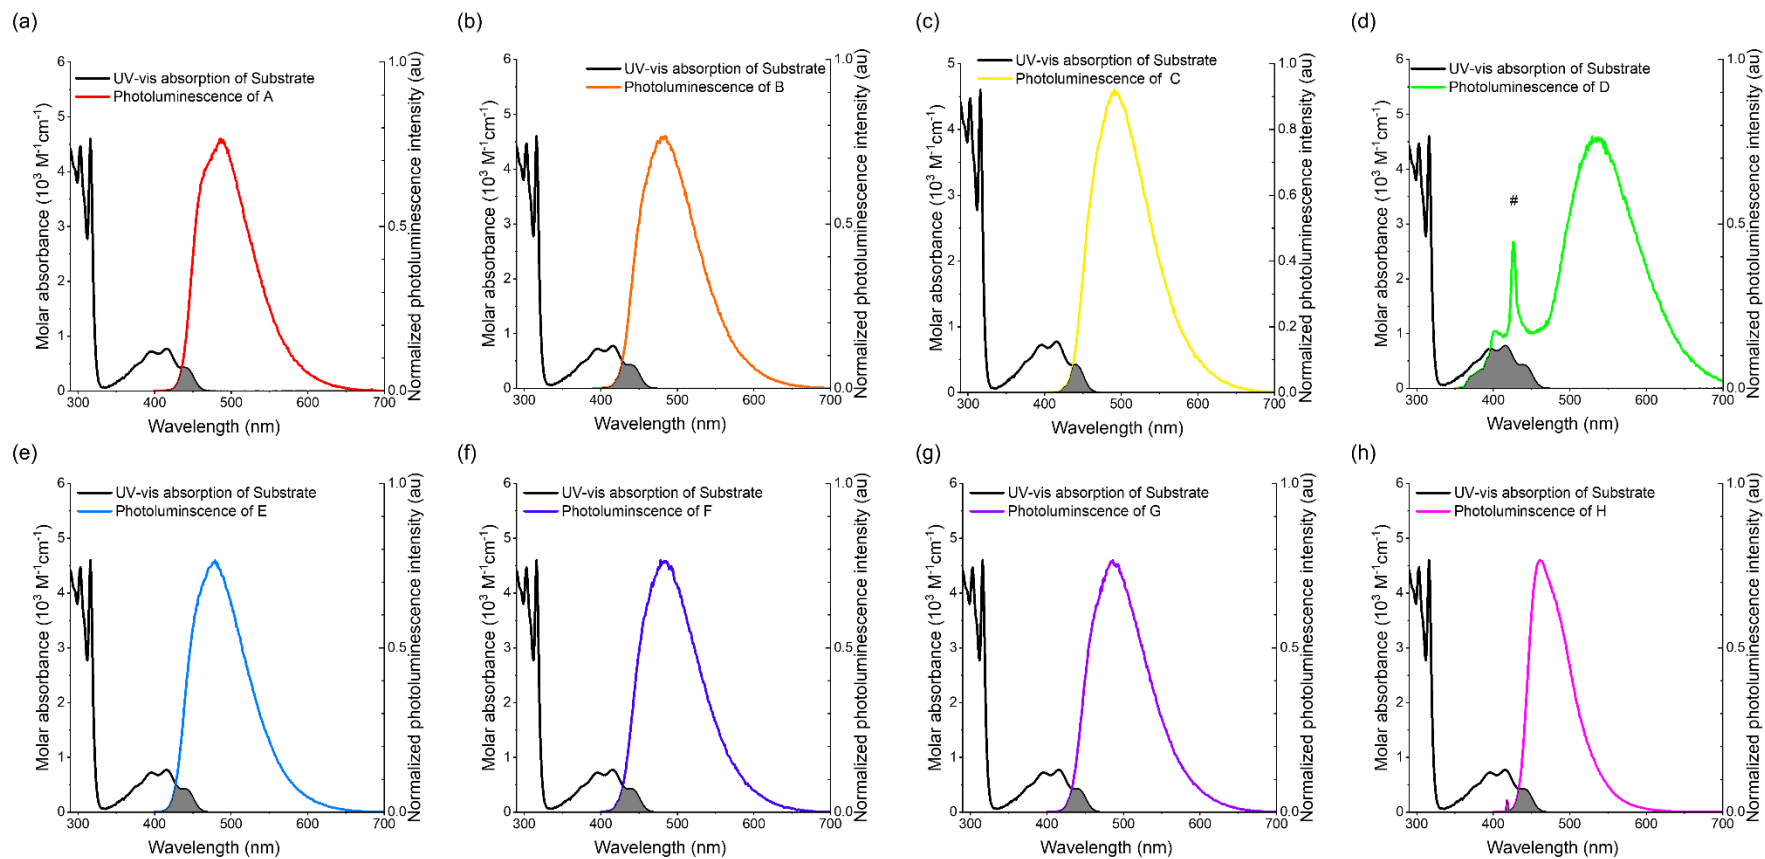

**Figure S3. Spectral overlap.** Overlaps between the UV–Vis absorption spectrum of **1** (black curves) and the photoluminescence spectra of organoPCs (colored curves). The spectral overlap integrals are indicated in grey, and their values ( $J$ ) are listed in Table 2 in the main text. The peak marked with a hashtag (#) corresponds to the Raman scattering of the solvent (1,4-dioxane).



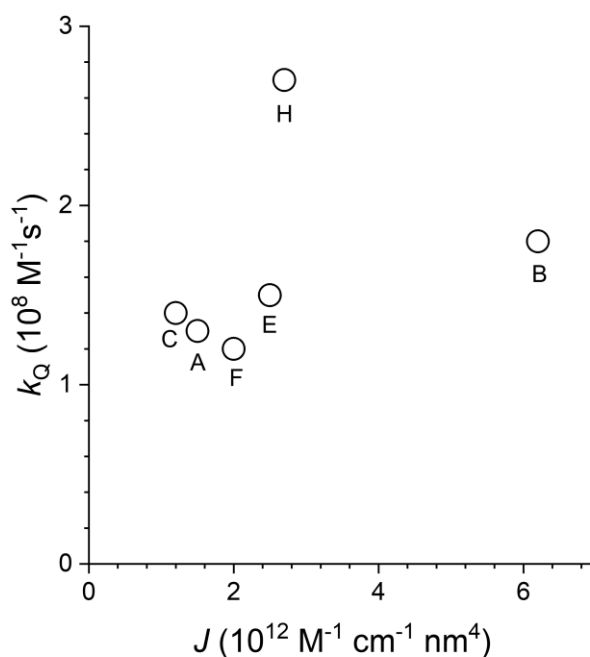

**Figure S4. Correlation.** Plot of the  $k_Q$  value as a function of  $J$ .

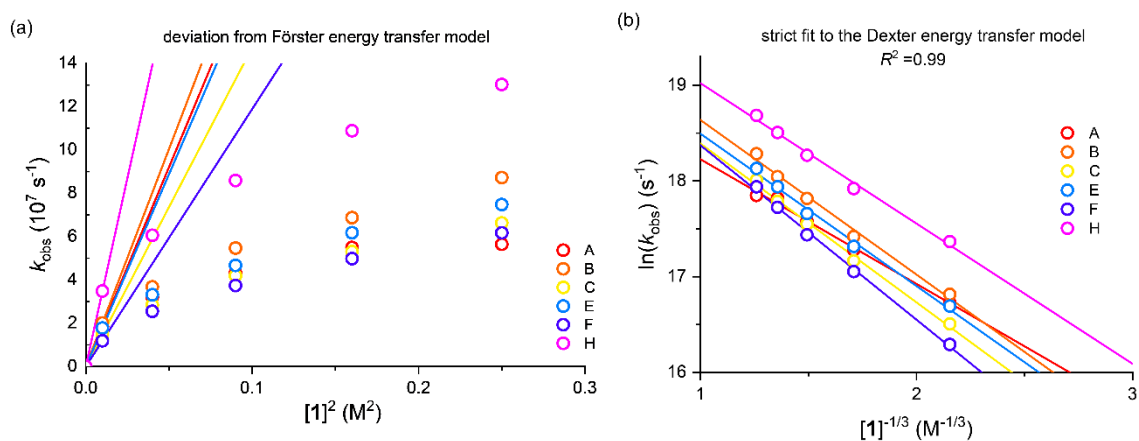

**Figure S5. Energy transfer.** Analyses of the photoluminescence (fluorescence quenching rate constant ( $k_{\text{obs}}$ ) based on two energy transfer mechanisms of (a) the Förster formalism and (b) the Dexter formalism. The lines in (a) show visual guidance where the Förster energy transfer mechanism applies (i.e.,  $k_{\text{obs}} \propto [\mathbf{1}]^2$ ), whereas the lines in (b) show visual guidance where the Dexter energy transfer mechanism applies (i.e.,  $\ln(k_{\text{obs}}) \propto [\mathbf{1}]^{-1/3}$ ).

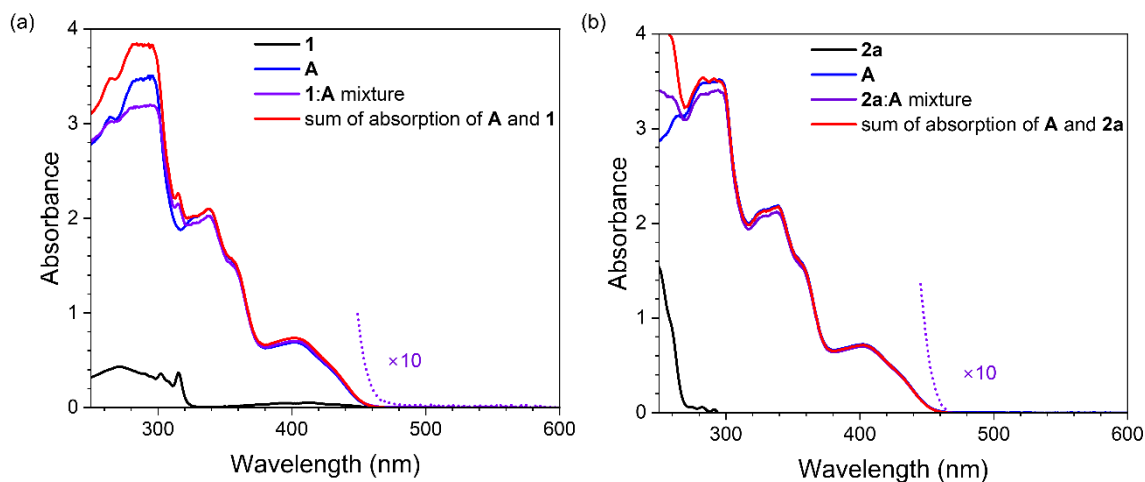

**Figure S6. Comparisons of UV-Vis absorption spectra.** UV-Vis absorption spectra for (a) **1**, **A**, and their equimolar mixture, and (b) **2a**, **A**, and their equimolar mixture recorded in 1,4-dioxane (1 mM). Mathematical sums of the spectra of individual species (i.e., **A** and **1** or **2a**) are included.

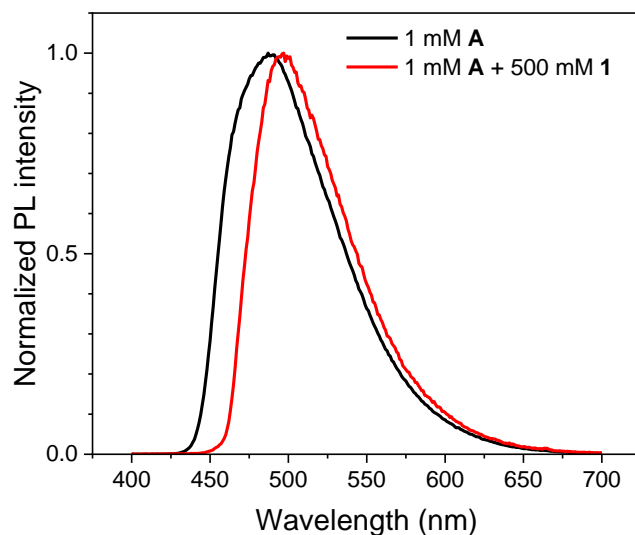

**Figure S7. Photoluminescence spectra.** Normalized photoluminescence spectra of 1.0 mM **A** recorded in the absence (black) and presence (red) of 500 mM **1** ( $\lambda_{\text{ex}} = 345$  nm, 1,4-dioxane).

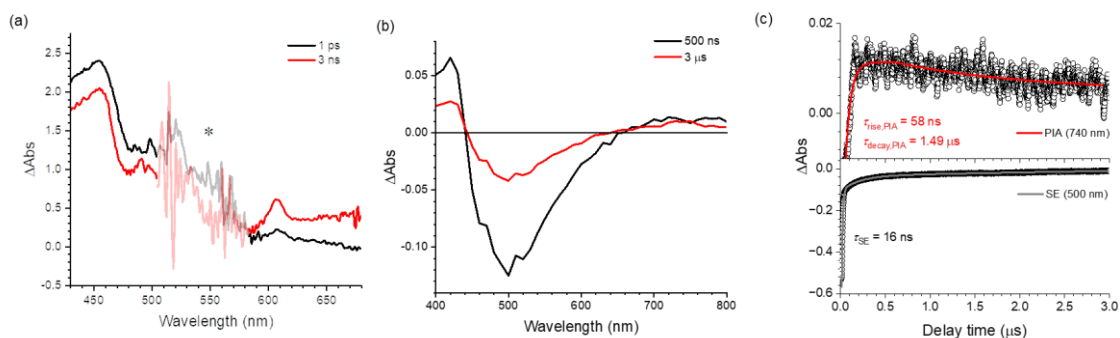

**Figure S8. Intersystem crossing.** (a) Femtosecond ( $\lambda_{\text{ex}} = 340$  nm) transient UV-Vis absorption spectra of 1.0 mM **A** recorded at delay times of 1 ps (black) and 3 ns (red). The region marked with an asterisk (\*) contain instrumental drifts due to the excitation beam. (b) Nanosecond ( $\lambda_{\text{ex}} = 355$  nm) transient UV-Vis-NIR absorption spectra of 100  $\mu\text{M}$  **A** recorded at delay times of 500 ns (black) and 3  $\mu\text{s}$  (red). (c) Traces of the transient absorption signals monitored at wavelengths of 740 (top panel) and 500 nm (bottom panel). The thick curves are nonlinear least-squares fits.

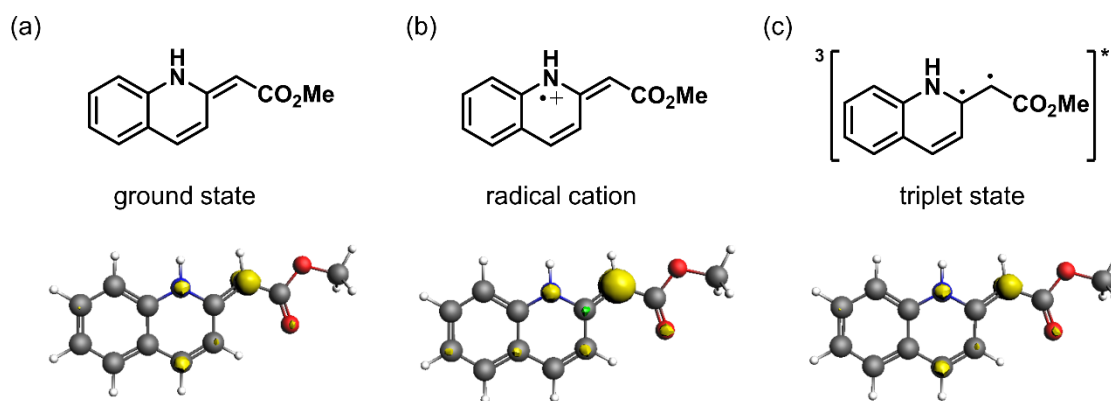

**Figure 9. Spin densities.** Spin density isosurface plots (isovalue = 0.01) in the optimized geometries for (a) the ground state, (b) the radical cation, and (c) the triplet state of **1** calculated at the level of uB3LYP-D3(BJ)/TZP with the solvation method based on the conductor-like screening model parameterized for 1,4-dioxane.

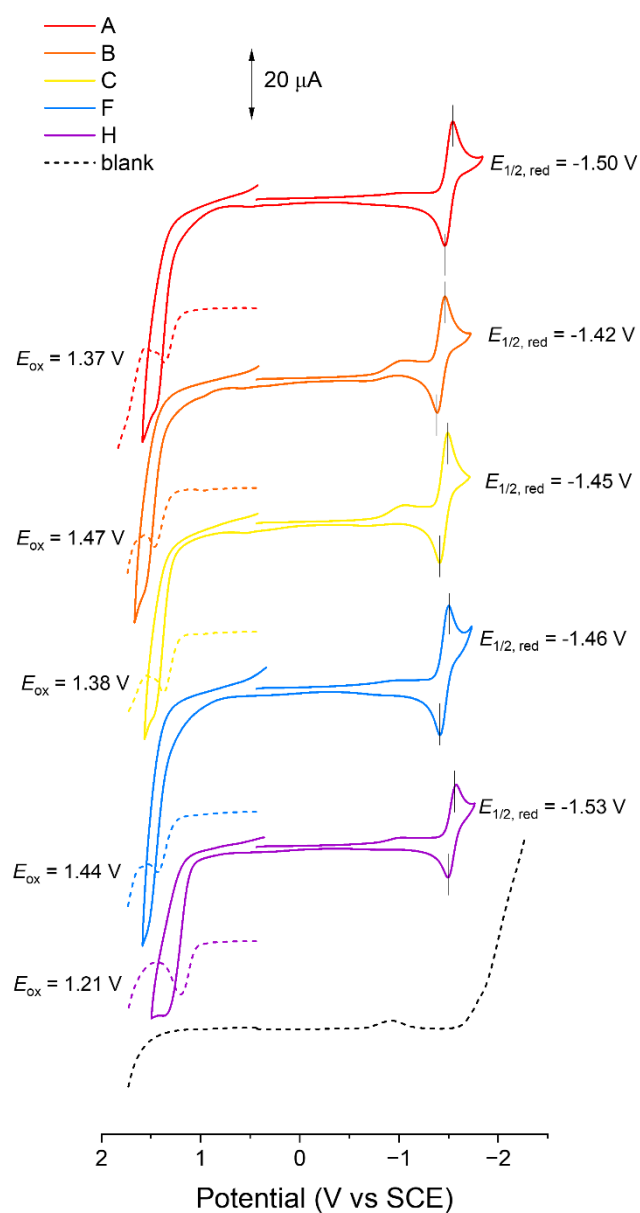

**Figure S10. Electrochemical potentials.** Cyclic (CV) and differential pulse (DPV) voltammograms of organoPCs. Conditions: Ar-saturated DMF containing 2.0 mM organoPC and 0.10 M TBAPF<sub>6</sub>; a Pt disc and a Pt wire as the working and the counter electrodes, respectively; an Ag/AgNO<sub>3</sub> pseudo reference electrode; scan rate = 0.10 V s<sup>-1</sup> for CV and 4 mV s<sup>-1</sup> for DPV.

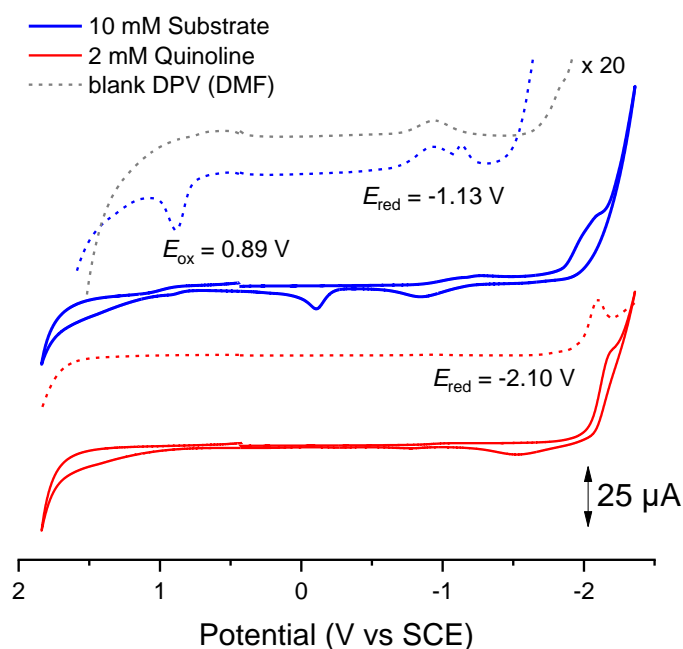

**Figure S11. Electrochemical potentials of substrate.** Cyclic (CV) and differential pulse (DPV) voltammograms of 2.0 mM quinoline (red) and 10 mM **1** (blue). Conditions: Ar-saturated DMF containing the sample and 0.10 M TBAPF<sub>6</sub>; a Pt disc and a Pt wire as the working and the counter electrodes, respectively; an Ag/AgNO<sub>3</sub> pseudo reference electrode; scan rate = 0.10 V s<sup>-1</sup> for CV and 4 mV s<sup>-1</sup> for DPV.

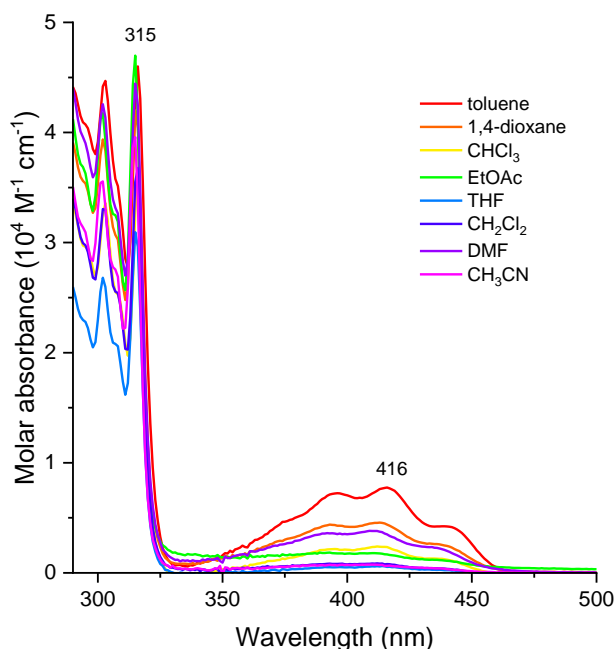

**Figure S12. Absorption of substrate.** UV-Vis absorption spectra of 100 μM **1** recorded in a variety of solutions. The numbers are the peak wavelengths of the benzenoid (315 nm) and the quinoid (416 nm) forms of **1**.

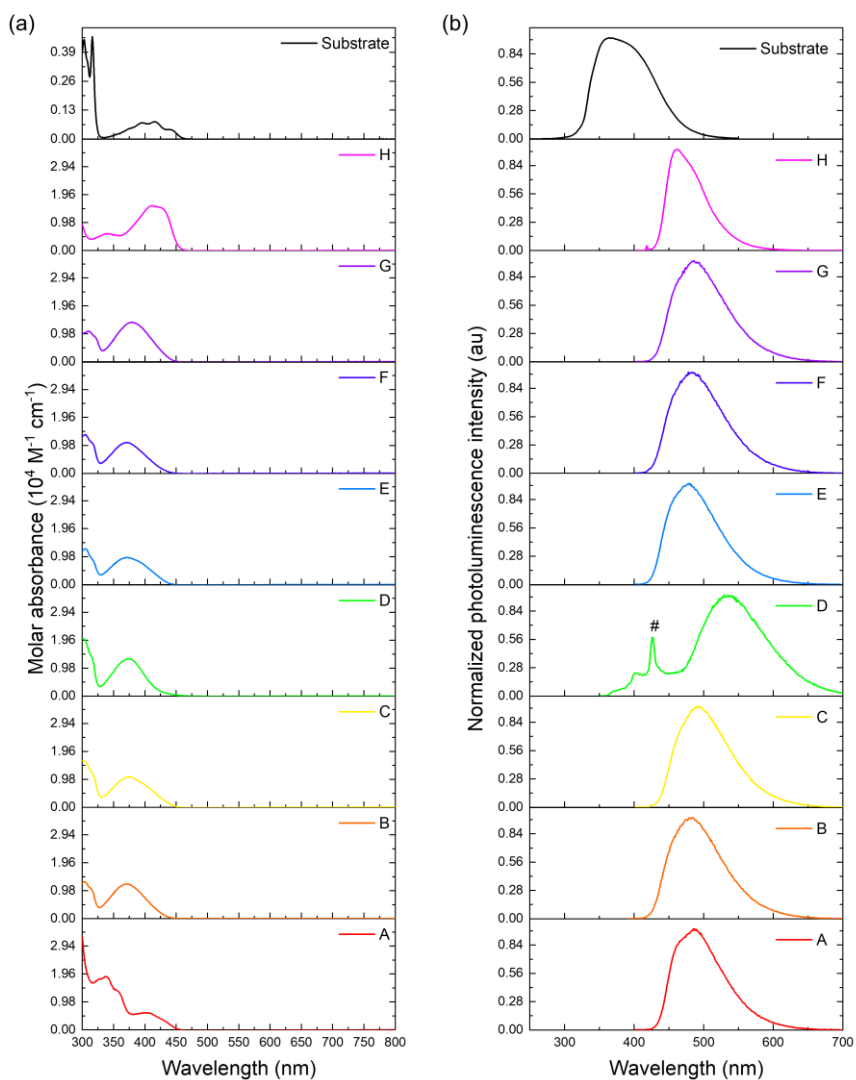

**Figure S13. Steady-state electronic spectra.** (a) UV–Vis absorption and (b) photoluminescence spectra of 10  $\mu\text{M}$  organoPCs recorded in 1,4-dioxane.  $\lambda_{\text{ex}}$  (nm) = 341 (A), 374 (B), 378 (C), 379 (D), 380 (E), 375 (F), 380 (G), 419 (H), and 307 (I). The peak marked with a hashtag (#) corresponds to the Raman scattering of the solvent (1,4-dioxane).

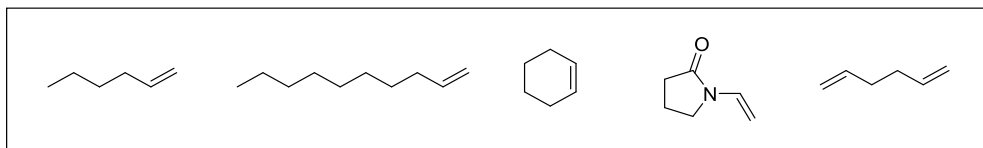

**Figure S14. Unsuccessful alkene substrates.**

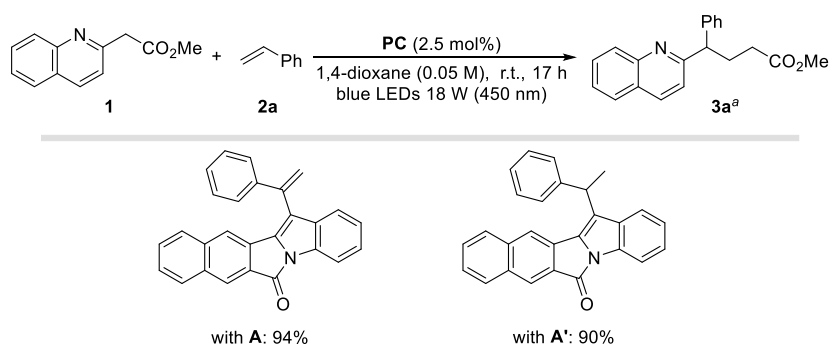

<sup>a</sup>The yields were determined by <sup>1</sup>H NMR spectroscopy using bromoform as an internal standard.

**Figure S15. The effect of alkenyl moiety of photocatalyst on photocatalytic reactivity: the alkenyl substituent did not affect the photocatalytic reactivity.**

## Analytic Data for Synthesized Compounds

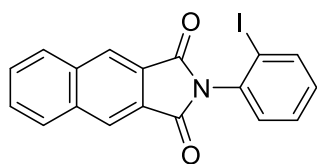

2-(2-iodophenyl)-1H-benzo[f]isoindole-1,3(2H)-dione, **S1**: white solid; melting point 216~218 °C;  $^1\text{H NMR}$  (600 MHz,  $\text{CDCl}_3$ )  $\delta$  8.50 (s, 2H), 8.12 (dd,  $J = 6.1, 3.3$  Hz, 2H), 8.01 (dd,  $J = 8.0, 1.3$  Hz, 1H), 7.75 (dd,  $J = 6.1, 3.3$  Hz, 2H), 7.53 (ddd,  $J = 7.8, 7.6, 1.3$  Hz, 1H), 7.37 (dd,  $J = 7.8, 1.6$  Hz, 1H), 7.22 (ddd,  $J = 8.0, 7.6, 1.6$  Hz, 1H);  $^{13}\text{C NMR}$  (151 MHz,  $\text{CDCl}_3$ )  $\delta$  166.55, 140.12, 135.93, 135.68, 131.23, 130.63, 130.37, 129.68, 129.61, 127.80, 125.87, 99.04; **HRMS** (ESI)  $m/z$ :  $[\text{M}]^+$  calc. for  $\text{C}_{18}\text{H}_{10}\text{INO}_2$ , 398.9756; found, 398.9758; **IR** (neat):  $\nu_{\text{max}} = 3059, 2353, 1717, 1372$   $\text{cm}^{-1}$ ;  $R_f$  0.32 (Hex/EtOAc, 4/1).

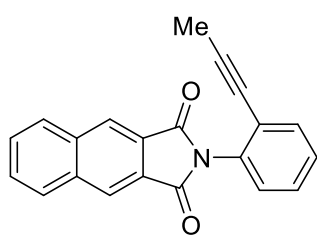

2-(2-(prop-1-yn-1-yl)phenyl)-1H-benzo[f]isoindole-1,3(2H)-dione, **S2**: white solid; melting point 212~214 °C;  $^1\text{H NMR}$  (600 MHz,  $\text{CDCl}_3$ )  $\delta$  8.48 (s, 2H), 8.11 (dd,  $J = 6.2, 3.3$  Hz, 2H), 7.74 (dd,  $J = 6.2, 3.3$  Hz, 2H), 7.59 (dd,  $J = 7.5, 1.6$  Hz, 1H), 7.44 (ddd,  $J = 7.7, 7.4, 1.6$  Hz, 1H), 7.41 (ddd,  $J = 7.7, 7.5, 1.5$  Hz, 1H), 7.34 (dd,  $J = 7.4, 1.5$  Hz, 1H), 1.83 (s, 3H);  $^{13}\text{C NMR}$  (151 MHz,  $\text{CDCl}_3$ )  $\delta$  167.00, 135.87, 133.68, 133.35, 130.56, 129.51, 129.29, 129.05, 128.64, 128.04, 125.48, 124.12, 91.68, 76.00, 4.63; **HRMS** (ESI)  $m/z$ :  $[\text{M}]^+$  calc. for  $\text{C}_{21}\text{H}_{13}\text{NO}_2$ , 311.0946; found, 311.0944; **IR** (neat):  $\nu_{\text{max}} = 3028, 2251, 1718, 1372$   $\text{cm}^{-1}$ ;  $R_f$  0.32 (Hex/EtOAc, 4/1).

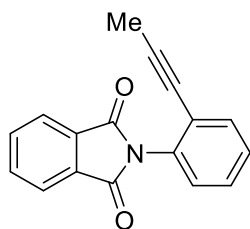

2-(2-(prop-1-yn-1-yl)phenyl)isoindoline-1,3-dione, **S4a**: colorless solid; melting point 134~136 °C;  $^1\text{H NMR}$  (600 MHz,  $\text{CDCl}_3$ )  $\delta$  7.96 (dd,  $J = 5.4, 3.1$  Hz, 2H), 7.78 (dd,  $J = 5.4, 3.1$  Hz, 2H), 7.56 (dd,  $J = 7.5, 1.8$  Hz, 1H), 7.41 (td,  $J = 7.5, 1.6$  Hz, 1H), 7.38 (td,  $J = 7.5, 1.6$  Hz, 1H), 7.28 (dd,  $J = 7.7, 1.5$  Hz, 1H), 1.83 (s, 3H);  $^{13}\text{C NMR}$  (151 MHz,  $\text{CDCl}_3$ )  $\delta$  167.13, 134.39, 133.36, 133.20, 132.19, 129.15, 129.06, 128.53, 124.08, 123.85, 91.55, 75.92, 4.50; **IR** (neat):  $\nu_{\text{max}} = 2988, 2901, 2338, 1720, 1382, 1079, 718$   $\text{cm}^{-1}$ ; **HRMS** (EI)  $m/z$ : calc. for  $\text{C}_{17}\text{H}_{11}\text{NO}_2$   $[\text{M}]^+$  261.0790, found 261.0789;  $R_f$  0.31 (Hex/EtOAc, 4/1).

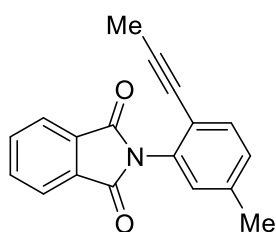

2-(5-methyl-2-(prop-1-yn-1-yl)phenyl)isoindoline-1,3-dione, **S4b**: colorless solid; melting point 156~158 °C;  $^1\text{H NMR}$  (600 MHz,  $\text{CDCl}_3$ )  $\delta$  7.96 (dd,  $J = 5.4, 3.1$  Hz, 2H), 7.78 (dd,  $J = 5.4, 3.1$  Hz, 2H), 7.45 (d,  $J = 7.9$  Hz, 1H), 7.20 (d,  $J = 7.9$  Hz, 1H), 7.10 (s, 1H), 2.39 (s, 3H), 1.82 (s, 3H);  $^{13}\text{C NMR}$  (151 MHz,  $\text{CDCl}_3$ )  $\delta$  167.31, 139.00, 134.38, 133.19, 132.97, 132.27, 130.15, 129.65, 123.87, 121.07, 90.62, 75.88, 21.45, 4.53. **IR** (neat):  $\nu_{\text{max}} = 2987, 2323, 1721, 1372, 1082, 718$   $\text{cm}^{-1}$ ; **HRMS** (EI)  $m/z$ : calc. for  $\text{C}_{18}\text{H}_{13}\text{NO}_2$   $[\text{M}]^+$  275.0946, found 275.0945;  $R_f$  0.31 (Hex/EtOAc, 4/1).



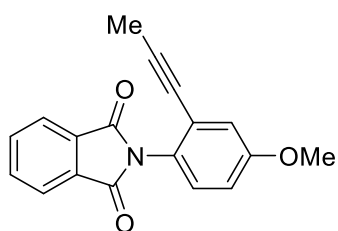

2-(4-methoxy-2-(prop-1-yn-1-yl)phenyl)isoindoline-1,3-dione, **S4c**: colorless solid; melting point 144~146 °C;  $^1\text{H NMR}$  (600 MHz,  $\text{CDCl}_3$ )  $\delta$  7.95 (dd,  $J = 5.4, 3.1$  Hz, 2H), 7.78 (dd,  $J = 5.4, 3.1$  Hz, 2H), 7.18 (d,  $J = 8.7$  Hz, 1H), 7.07 (d,  $J = 2.8$  Hz, 1H), 6.94 (dd,  $J = 8.7, 2.8$  Hz, 1H), 3.82 (s, 3H), 1.83 (s, 3H);  $^{13}\text{C NMR}$  (151 MHz,  $\text{CDCl}_3$ )  $\delta$  167.55, 159.90, 134.35, 132.27, 130.07, 126.05, 125.08, 123.85, 117.82, 115.03, 91.33, 75.91, 55.76, 4.54. **IR** (neat):  $\nu_{\text{max}} = 2972, 2358, 1723, 1504, 1385, 1082, 720$   $\text{cm}^{-1}$ ; **HRMS** (EI)  $m/z$ : calc. for  $\text{C}_{18}\text{H}_{13}\text{NO}_3$   $[\text{M}]^+$  291.0895, found 291.0898;  $R_f$  0.24 (Hex/EtOAc, 4/1).

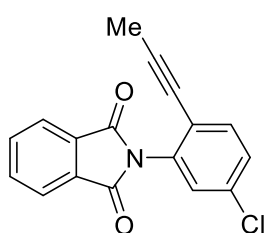

2-(5-chloro-2-(prop-1-yn-1-yl)phenyl)isoindoline-1,3-dione, **S4d**: yellow solid; melting point 168~170 °C;  $^1\text{H NMR}$  (600 MHz,  $\text{CDCl}_3$ )  $\delta$  7.97 (dd,  $J = 5.4, 3.1$  Hz, 2H), 7.80 (dd,  $J = 5.4, 3.1$  Hz, 2H), 7.48 (d,  $J = 8.4$  Hz, 1H), 7.37 (dd,  $J = 8.4, 2.1$  Hz, 1H), 7.30 (d,  $J = 2.1$  Hz, 1H), 1.83 (s, 3H);  $^{13}\text{C NMR}$  (151 MHz,  $\text{CDCl}_3$ )  $\delta$  166.75, 134.62, 134.38, 134.05, 133.91, 132.08, 129.54, 129.46, 124.06, 122.78, 92.73, 75.16, 4.59; **IR** (neat):  $\nu_{\text{max}} = 2988, 2355, 1723, 1489, 1369, 1077, 718$   $\text{cm}^{-1}$ ; **HRMS** (EI)  $m/z$ : calc. for  $\text{C}_{17}\text{H}_{10}\text{ClNO}_2$   $[\text{M}]^+$  295.0400, found 295.0398;  $R_f$  0.31 (Hex/EtOAc, 4/1).

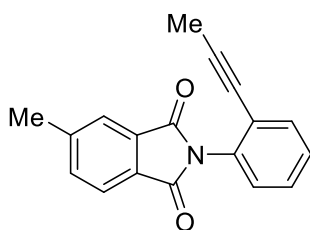

5-methyl-2-(2-(prop-1-yn-1-yl)phenyl)isoindoline-1,3-dione, **S4e**: colorless solid; melting point 148~150 °C;  $^1\text{H NMR}$  (600 MHz,  $\text{CDCl}_3$ )  $\delta$  7.84 (d,  $J = 7.6$  Hz, 1H), 7.76 (s, 1H), 7.57 (d,  $J = 7.6$  Hz, 1H), 7.55 (dd,  $J = 7.6, 1.4$  Hz, 1H), 7.40 (ddd,  $J = 7.6, 7.6, 1.9$  Hz, 1H), 7.37 (ddd,  $J = 7.6, 7.6, 1.9$  Hz, 1H), 7.27 (dd,  $J = 7.6, 1.4$  Hz, 1H), 2.54 (s, 3H), 1.84 (s, 3H);  $^{13}\text{C NMR}$  (151 MHz,  $\text{CDCl}_3$ )  $\delta$  167.36, 167.26, 145.72, 134.98, 133.50, 133.22, 132.62, 129.65, 129.11, 129.10, 128.53, 124.39, 124.13, 123.81, 91.47, 75.98, 22.21, 4.55; **IR** (neat):  $\nu_{\text{max}} = 2917, 2355, 1718, 1493, 1374, 1104, 740$   $\text{cm}^{-1}$ ; **HRMS** (EI)  $m/z$ : calc. for  $\text{C}_{18}\text{H}_{13}\text{NO}_2$   $[\text{M}]^+$  275.0946, found 275.0948  $R_f$  0.36 (Hex/EtOAc, 4/1).

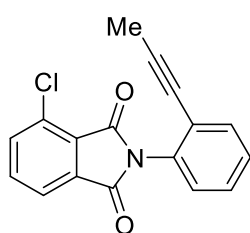

4-chloro-2-(2-(prop-1-yn-1-yl)phenyl)isoindoline-1,3-dione, **S4f**: yellow solid; melting point 190~192 °C;  $^1\text{H NMR}$  (600 MHz,  $\text{CDCl}_3$ )  $\delta$  7.88 (dd,  $J = 5.2, 3.0$  Hz, 1H), 7.73-7.68 (m, 2H), 7.56 (dd,  $J = 6.6, 2.4$  Hz, 1H), 7.45-7.37 (m, 2H), 7.27 (dd,  $J = 7.3, 1.8$  Hz, 1H), 1.86 (s, 3H);  $^{13}\text{C NMR}$  (151 MHz,  $\text{CDCl}_3$ )  $\delta$  165.62, 164.68, 136.18, 135.34, 134.26, 133.28, 132.96, 131.95, 129.34, 129.01, 128.57, 127.90, 124.06, 122.39, 91.79, 75.89, 4.60; **IR** (neat):  $\nu_{\text{max}} = 2917, 2241, 1719, 1374, 1114, 900, 737$   $\text{cm}^{-1}$ ; **HRMS** (EI)  $m/z$ : calc. for  $\text{C}_{17}\text{H}_{10}\text{ClNO}_2$   $[\text{M}]^+$  295.0400, found 295.0401;  $R_f$  0.32 (Hex/EtOAc, 4/1).

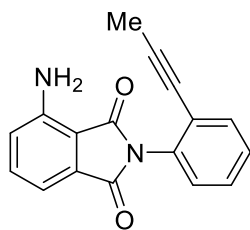

4-amino-2-(2-(prop-1-yn-1-yl)phenyl)isoindoline-1,3-dione, **S4g**: yellow solid; melting point 210~212 °C;  $^1\text{H NMR}$  (600 MHz,  $\text{CDCl}_3$ )  $\delta$  7.55 (dd,  $J = 7.5, 1.8$  Hz, 1H), 7.46 (dd,  $J = 8.2, 7.2$  Hz, 1H), 7.40 (ddd,  $J = 7.6, 7.6, 1.8$  Hz, 1H), 7.37 (ddd,  $J = 7.6, 7.6, 1.8$  Hz, 1H), 7.27 (dd,  $J = 7.6, 1.4$  Hz, 1H), 7.24 (d,  $J = 7.2$  Hz, 1H), 6.89 (d,  $J = 8.2$  Hz, 1H), 5.33 (s, 2H), 1.88 (s, 3H);  $^{13}\text{C NMR}$  (151 MHz,  $\text{CDCl}_3$ )  $\delta$  169.13, 167.43, 145.91, 135.55, 133.50, 133.24, 132.90, 129.21, 129.01, 128.53, 124.21, 121.36, 113.21, 111.46, 91.48, 76.09, 4.65. **IR** (neat):  $\nu_{\text{max}} = 3369, 2987, 2355, 1700, 1493, 1371, 738$   $\text{cm}^{-1}$ ; **HRMS** (EI)  $m/z$ : calc. for  $\text{C}_{17}\text{H}_{12}\text{N}_2\text{O}_2$   $[\text{M}]^+$  276.0899, found 276.0896;  $R_f$  0.54 (Hex/EtOAc, 1/1).

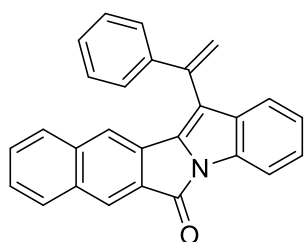

13-(1-phenylvinyl)-6H-benzo[5,6]isoindolo[2,1-a]indol-6-one, **A**: yellow solid; melting point 203~206 °C;  $^1\text{H NMR}$  (600 MHz,  $\text{CDCl}_3$ )  $\delta$  8.24 (s, 1H), 8.06 (d,  $J = 7.9$  Hz, 1H), 7.85 (d,  $J = 7.7$  Hz, 1H), 7.62 – 7.55 (m, 2H), 7.51 – 7.43 (m, 3H), 7.43 – 7.38 (m, 3H), 7.38 (d,  $J = 7.9$  Hz, 1H), 7.34 (dd,  $J = 7.9, 7.3$  Hz, 1H), 7.17 (dd,  $J = 7.9, 7.3$  Hz, 1H), 6.94 (s, 1H), 6.01 (d,  $J = 1.3$  Hz, 1H), 5.84 (d,  $J = 1.3$  Hz, 1H);  $^{13}\text{C NMR}$  (151 MHz,  $\text{CDCl}_3$ )  $\delta$  162.73, 140.94, 140.49, 136.26, 135.82, 134.78, 133.45, 132.83, 131.84, 130.17, 129.20, 129.16, 129.03, 128.92, 128.59, 127.91, 127.35, 126.49, 126.41, 124.39, 122.43, 121.99, 118.92, 117.79, 113.90; **UV-vis** (1,4-dioxane):  $\lambda_{\text{max}}$  ( $\epsilon$ ) = 403 nm (6540); **HRMS** (ESI)  $m/z$ :  $[\text{M}]^+$  calc. for  $\text{C}_{27}\text{H}_{17}\text{NO}$ , 371.1310; found, 371.1312; **IR** (neat):  $\nu_{\text{max}} = 3054, 1731, 1636, 1606$   $\text{cm}^{-1}$ ;  $R_f$  0.59 (Hex/EtOAc, 4/1).

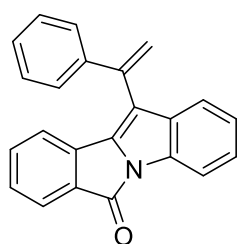

11-(1-phenylvinyl)-6H-isoindolo[2,1-a]indol-6-one, **B**: yellow solid; melting point 163~165 °C;  $^1\text{H NMR}$  (600 MHz,  $\text{CDCl}_3$ )  $\delta$  7.97 (d,  $J = 8.0$  Hz, 1H), 7.75 (d,  $J = 6.4$  Hz, 1H), 7.54 (dd,  $J = 6.4, 2.8$  Hz, 2H), 7.41-7.34 (m, 3H), 7.31 (t,  $J = 7.6$  Hz, 1H), 7.28-7.23 (m, 3H), 7.10 (t,  $J = 7.6$  Hz, 1H), 6.82 (d,  $J = 6.8$  Hz, 1H), 5.96 (d,  $J = 1.1$  Hz, 1H), 5.76 (d,  $J = 1.1$  Hz, 1H);  $^{13}\text{C NMR}$  (151 MHz,  $\text{CDCl}_3$ )  $\delta$  162.72, 140.59, 140.20, 135.85, 134.68, 134.52, 133.96, 133.77, 133.66, 128.92, 128.66, 128.61, 127.58, 126.80, 125.27, 124.02, 122.62, 122.15, 120.20, 117.83, 113.51; **IR** (neat):  $\nu_{\text{max}} = 2927, 1719, 1443, 1361, 916, 744, 701$   $\text{cm}^{-1}$ ; **HRMS** (EI)  $m/z$ : calc. for  $\text{C}_{23}\text{H}_{15}\text{NO}$   $[\text{M}]^+$  321.1154, found 321.1155;  $R_f$  0.62 (Hex/EtOAc, 4/1).

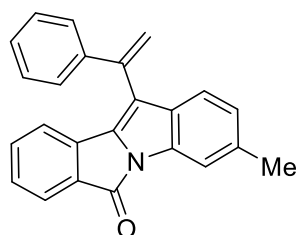

3-methyl-11-(1-phenylvinyl)-6H-isoindolo[2,1-a]indol-6-one, **C**: yellow solid; melting point 175~177 °C;  $^1\text{H NMR}$  (600 MHz,  $\text{CDCl}_3$ )  $\delta$  7.79 (s, 1H), 7.74 (dd,  $J = 6.5, 2.2$  Hz, 1H), 7.52 (dd,  $J = 6.5, 3.0$  Hz, 2H), 7.39-7.34 (m, 3H), 7.27-7.21 (m, 2H), 7.11 (d,  $J = 8.0$  Hz, 1H), 6.92 (d,  $J = 8.7$  Hz, 1H), 6.78 (dd,  $J = 6.2, 1.7$  Hz, 1H), 5.93 (d,  $J = 1.1$  Hz, 1H), 5.74 (d,  $J = 1.1$

Hz, 1H), 2.45 (s, 3H); <sup>13</sup>C NMR (151 MHz, CDCl<sub>3</sub>) δ 162.81, 140.73, 140.28, 137.41, 135.28, 134.83, 134.14, 133.91, 133.59, 132.24, 128.91, 128.58, 128.42, 127.62, 125.34, 125.25, 122.45, 121.80, 120.39, 117.70, 113.94, 21.90; **IR (neat)**: ν<sub>max</sub> = 2970, 1739, 1437, 1366, 1229, 890, 528 cm<sup>-1</sup>; **HRMS (EI) m/z**: calc. for C<sub>24</sub>H<sub>17</sub>NO [M]<sup>+</sup> 335.1310, found 335.1307; **R<sub>f</sub>** 0.63 (Hex/EtOAc, 4/1).

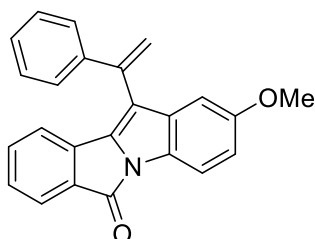

2-methoxy-11-(1-phenylvinyl)-6*H*-isoindolo[2,1-*a*]indol-6-one, **D**: yellow solid; melting point 189~191 °C; <sup>1</sup>H NMR (600 MHz, CDCl<sub>3</sub>) δ 7.83 (d, *J* = 8.7 Hz, 1H), 7.71 (dd, *J* = 5.5, 3.0 Hz, 1H), 7.53 (dd, *J* = 6.5, 3.0 Hz, 2H), 7.39-7.35 (m, 3H), 7.26-7.20 (m, 2H), 6.89 (dd, *J* = 8.7, 2.4 Hz, 1H), 6.78 (dd, *J* = 5.5, 2.6 Hz, 1H), 6.72 (d, *J* = 2.4 Hz, 1H), 5.95 (s, 1H), 5.74 (s, 1H), 3.72 (s, 3H); <sup>13</sup>C NMR (151 MHz, CDCl<sub>3</sub>) δ 162.43, 156.92, 140.62, 140.11, 136.71, 135.54, 134.66, 134.04, 133.50, 128.92, 128.62, 128.62, 128.40, 127.59, 125.15, 122.45, 120.02, 117.68, 114.40, 114.02, 105.97, 55.82; **IR (neat)**: ν<sub>max</sub> = 2970, 1739, 1367, 1217, 918, 702, 541 cm<sup>-1</sup>; **HRMS (EI) m/z**: calc. for C<sub>24</sub>H<sub>17</sub>NO<sub>2</sub> [M]<sup>+</sup> 351.1259, found 351.1260; **R<sub>f</sub>** 0.54 (Hex/EtOAc, 4/1).

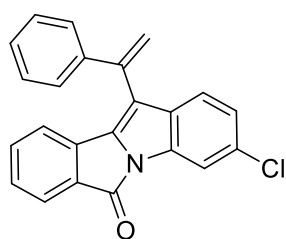

3-chloro-11-(1-phenylvinyl)-6*H*-isoindolo[2,1-*a*]indol-6-one, **E**: yellow solid; melting point 182~184 °C; <sup>1</sup>H NMR (600 MHz, CDCl<sub>3</sub>) δ 7.96 (d, *J* = 1.6 Hz, 1H), 7.75 (dd, *J* = 6.2, 2.0 Hz, 1H), 7.50 (dd, *J* = 6.5, 3.0 Hz, 2H), 7.39-7.35 (m, 3H), 7.32-7.27 (m, 2H), 7.11 (d, *J* = 8.4 Hz, 1H), 7.05 (dd, *J* = 8.4, 1.8 Hz, 1H), 6.85 (dd, *J* = 6.2, 1.8 Hz, 1H), 5.95 (s, 1H), 5.72 (s, 1H); <sup>13</sup>C NMR (151 MHz, CDCl<sub>3</sub>) δ 162.57, 140.31, 139.94, 136.21, 134.60, 134.04, 133.98, 133.61, 133.01, 132.84, 129.01, 128.96, 128.79, 127.58, 125.56, 124.50, 122.89, 122.76, 119.82, 118.03, 113.82; **IR (neat)**: ν<sub>max</sub> = 2970, 1739, 1440, 1366, 1229, 1217, 900, 528 cm<sup>-1</sup>; **HRMS (EI) m/z**: calc. for C<sub>23</sub>H<sub>14</sub>ClNO [M]<sup>+</sup> 355.0764, found 355.0760; **R<sub>f</sub>** 0.63 (Hex/EtOAc, 4/1).

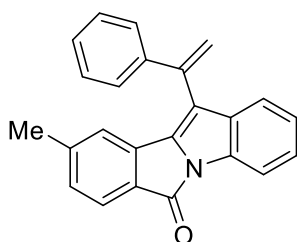

9-methyl-11-(1-phenylvinyl)-6*H*-isoindolo[2,1-*a*]indol-6-one, **F**: yellow solid; melting point 168~170 °C; <sup>1</sup>H NMR (600 MHz, CDCl<sub>3</sub>) δ 7.95 (d, *J* = 7.8 Hz, 1H), 7.61 (d, *J* = 7.8 Hz, 1H), 7.54 (dd, *J* = 4.2, 2.8 Hz, 2H), 7.40-7.37 (m, 3H), 7.31-7.28 (m, 1H), 7.27 (d, *J* = 8.2 Hz, 1H), 7.10 (t, *J* = 8.2 Hz, 1H), 7.05 (t, *J* = 8.2 Hz, 1H), 6.52 (s, 1H), 5.95 (d, *J* = 1.1 Hz, 1H), 5.77 (d, *J* = 1.1 Hz, 1H) 2.20 (s, 3H); <sup>13</sup>C NMR (151 MHz, CDCl<sub>3</sub>) δ 162.84, 144.56, 140.75, 140.43, 135.91, 134.92, 134.35, 133.80, 131.35, 129.39, 128.90, 128.49, 127.74, 126.66, 125.09, 123.84, 123.48, 122.07, 119.86, 117.76, 113.41, 22.09; **IR (neat)**: ν<sub>max</sub> = 3057, 1731, 1451, 1128, 777, 690 cm<sup>-1</sup>; **HRMS (EI) m/z**: calc. for C<sub>24</sub>H<sub>17</sub>NO [M]<sup>+</sup> 335.1316, found 335.1308; **R<sub>f</sub>** 0.63 (Hex/EtOAc, 4/1).

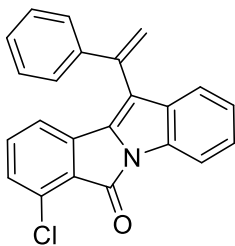

7-chloro-11-(1-phenylvinyl)-6*H*-indolo[2,1-*a*]indol-6-one, **G**: yellow solid; melting point 181~183 °C; <sup>1</sup>H NMR (600 MHz, CDCl<sub>3</sub>) δ 7.96 (d, *J* = 8.0 Hz, 1H), 7.50 (dd, *J* = 6.6, 3.0 Hz, 2H), 7.39-7.34 (m, 3H), 7.31 (dt, *J* = 7.7, 0.8 Hz, 1H), 7.26 (d, *J* = 7.7 Hz, 1H), 7.17-7.13 (m, 2H), 7.11 (dt, *J* = 7.7, 0.8 Hz, 1H), 6.70 (dd, *J* = 5.2, 3.3 Hz, 1H), 5.97 (d, *J* = 0.9 Hz, 1H), 5.74 (d, *J* = 0.9 Hz, 1H); <sup>13</sup>C NMR (151 MHz, CDCl<sub>3</sub>) δ 160.23, 140.32, 140.02, 136.78, 134.44, 134.36, 133.80, 133.72, 133.09, 130.29, 129.36, 128.97, 128.70, 127.51, 127.20, 124.27, 122.24, 121.05, 120.88, 118.21, 113.63; **IR** (neat):  $\nu_{\max}$  = 3060, 2970, 1739, 1380, 1217, 912, 737, 704 cm<sup>-1</sup>; **HRMS** (EI) *m/z*: calc. for C<sub>23</sub>H<sub>14</sub>ClNO [M]<sup>+</sup> 355.0764, found 355.0766; **R<sub>f</sub>** 0.61 (Hex/EtOAc, 4/1).

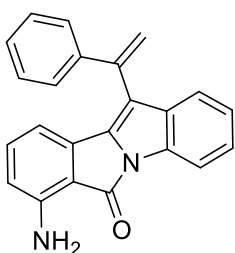

10-amino-11-(1-phenylvinyl)-6*H*-indolo[2,1-*a*]indol-6-one, **H**: yellow solid; melting point 193~195 °C; <sup>1</sup>H NMR (600 MHz, CDCl<sub>3</sub>) δ 7.92 (d, *J* = 8.1 Hz, 1H), 7.51 (dd, *J* = 6.4, 3.2 Hz, 2H), 7.38-7.34 (m, 3H), 7.29 (t, *J* = 7.6 Hz, 1H), 7.22 (d, *J* = 7.8 Hz, 1H), 7.08 (t, *J* = 7.6 Hz, 1H), 7.00 (t, *J* = 7.8 Hz, 1H), 6.43 (d, *J* = 8.1 Hz, 1H), 6.22 (d, *J* = 7.4 Hz, 1H), 5.93 (d, *J* = 1.1 Hz, 1H), 5.73 (d, *J* = 1.1 Hz, 1H), 5.23 (s, 2H); <sup>13</sup>C NMR (151 MHz, CDCl<sub>3</sub>) δ 164.78, 147.32, 140.78, 140.24, 136.02, 135.23, 134.96, 134.32, 133.43, 128.82, 128.47, 127.57, 126.36, 123.49, 122.03, 119.54, 117.64, 116.08, 114.16, 113.07, 112.26; **IR** (neat):  $\nu_{\max}$  = 3451, 3016, 2970, 1739, 1366, 1229, 528 cm<sup>-1</sup>; **HRMS** (EI) *m/z*: calc. for C<sub>23</sub>H<sub>16</sub>N<sub>2</sub>O [M]<sup>+</sup> 336.1263, found 336.1264; **R<sub>f</sub>** 0.39 (Hex/EtOAc, 4/1).

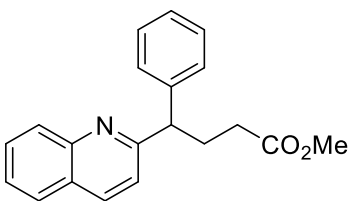

methyl 4-phenyl-4-(quinolin-2-yl)butanoate, **3a**: yellowish oil; <sup>1</sup>H NMR (600 MHz, CDCl<sub>3</sub>) δ 8.15 (d, *J* = 8.5 Hz, 1H), 7.98 (d, *J* = 8.5 Hz, 1H), 7.73 (d, *J* = 8.0 Hz, 1H), 7.70 (dd, *J* = 8.5, 7.0 Hz, 1H), 7.48 (dd, *J* = 8.0, 7.0 Hz, 1H), 7.40 (d, *J* = 7.7 Hz, 2H), 7.30 (dd, *J* = 7.7, 7.7 Hz, 2H), 7.23 (d, *J* = 8.5 Hz, 1H), 7.21 (t, *J* = 7.7 Hz, 1H), 4.32 (t, *J* = 7.8 Hz, 1H), 3.64 (s, 3H), 2.83 – 2.75 (m, 1H), 2.61 – 2.52 (m, 1H), 2.47 – 2.35 (m, 2H); <sup>13</sup>C NMR (151 MHz, CDCl<sub>3</sub>) δ 174.05, 163.05, 147.88, 142.94, 136.39, 129.52, 129.40, 128.74, 128.34, 127.56, 127.00, 126.85, 126.11, 121.47, 53.43, 51.59, 32.54, 29.86; **IR** (neat):  $\nu_{\max}$  = 3026, 2948, 1731, 1597, 1427, 1238, 1151 cm<sup>-1</sup>; **R<sub>f</sub>** 0.40 (Hex/EtOAc, 4/1).

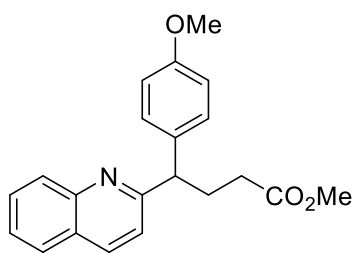

methyl 4-(4-methoxyphenyl)-4-(quinolin-2-yl)butanoate, **3b**: yellow oil;  $^1\text{H NMR}$  (600 MHz,  $\text{CDCl}_3$ )  $\delta$  8.13 (d,  $J = 8.5$  Hz, 1H), 7.96 (d,  $J = 8.6$  Hz, 1H), 7.71 (d,  $J = 8.2$  Hz, 1H), 7.68 (dd,  $J = 8.6, 6.9$  Hz, 1H), 7.46 (dd,  $J = 8.2, 6.9$  Hz, 1H), 7.31 (d,  $J = 8.7$  Hz, 2H), 7.21 (d,  $J = 8.5$  Hz, 1H), 6.84 (d,  $J = 8.7$  Hz, 2H), 4.26 (t,  $J = 7.7$  Hz, 1H), 3.73 (s, 3H), 3.63 (s, 3H), 2.79 – 2.67 (m, 1H), 2.57 – 2.48 (m, 1H), 2.45 – 2.34 (m, 2H);  $^{13}\text{C NMR}$  (151 MHz,  $\text{CDCl}_3$ )  $\delta$  174.02, 163.38, 158.46, 147.81, 136.30, 134.97, 129.42, 129.31, 129.22, 127.51, 126.92, 126.00, 121.35, 114.08, 55.25, 52.54, 51.50, 32.49, 29.94; **IR** (neat):  $\nu_{\text{max}} = 2950, 2836, 1731, 1600, 1508, 1436, 1245, 1176, 1034$   $\text{cm}^{-1}$ ;  $R_f$  0.30 (Hex/EtOAc, 4/1).

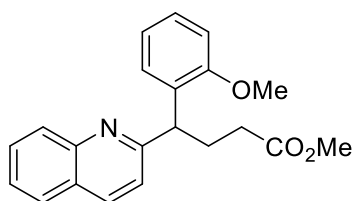

methyl 4-(2-methoxyphenyl)-4-(quinolin-2-yl)butanoate, **3c**: yellow oil;  $^1\text{H NMR}$  (600 MHz,  $\text{CDCl}_3$ )  $\delta$  8.13 (d,  $J = 8.5$  Hz, 1H), 7.96 (d,  $J = 8.4$  Hz, 1H), 7.73 (d,  $J = 8.1$  Hz, 1H), 7.68 (dd,  $J = 8.4, 6.9$  Hz, 1H), 7.47 (dd,  $J = 8.1, 6.9$  Hz, 1H), 7.29 (d,  $J = 7.6$  Hz, 1H), 7.22 (d,  $J = 8.5$  Hz, 1H), 7.19 (ddd,  $J = 8.2, 7.4$  Hz, 1H), 6.90 (dd,  $J = 7.6, 7.4$  Hz, 1H), 6.88 (d,  $J = 8.2$  Hz, 1H), 4.82 (t,  $J = 7.5$  Hz, 1H), 3.82 (s, 3H), 3.63 (s, 3H), 2.83 – 2.72 (m, 1H), 2.52 – 2.44 (m, 1H), 2.45 – 2.39 (m, 2H);  $^{13}\text{C NMR}$  (151 MHz,  $\text{CDCl}_3$ )  $\delta$  174.34, 163.45, 157.17, 147.93, 136.00, 131.49, 129.58, 129.18, 128.88, 127.78, 127.53, 127.00, 125.91, 122.04, 120.93, 110.73, 55.62, 51.55, 45.06, 32.70, 29.14; **IR** (neat):  $\nu_{\text{max}} = 2948, 2837, 1731, 1598, 1436, 1239, 1150, 1027$   $\text{cm}^{-1}$ ; **HRMS** (EI)  $m/z$ : calc. for  $\text{C}_{21}\text{H}_{21}\text{NO}_3$   $[\text{M}]^+$  335.1521, found 335.1523;  $R_f$  0.36 (Hex/EtOAc, 4/1).

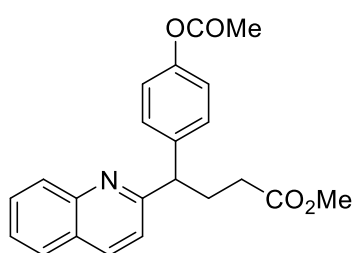

methyl 4-(4-acetoxyphenyl)-4-(quinolin-2-yl)butanoate **3d**: yellow oil;  $^1\text{H NMR}$  (600 MHz,  $\text{CDCl}_3$ )  $\delta$  8.10 (d,  $J = 8.4$  Hz, 1H), 8.00 (d,  $J = 8.5$  Hz, 1H), 7.74 (d,  $J = 8.1$  Hz, 1H), 7.69 (dd,  $J = 8.4, 6.9$  Hz, 1H), 7.49 (dd,  $J = 8.1, 6.9$  Hz, 1H), 7.38 (d,  $J = 8.5$  Hz, 2H), 7.21 (d,  $J = 8.5$  Hz, 1H), 7.01 (d,  $J = 8.5$  Hz, 2H), 4.29 (t,  $J = 7.7$  Hz, 1H), 3.63 (s, 3H), 2.78 – 2.69 (m, 1H), 2.57 – 2.46 (m, 1H), 2.42 – 2.32 (m, 2H), 2.26 (s, 3H);  $^{13}\text{C NMR}$  (151 MHz,  $\text{CDCl}_3$ )  $\delta$  174.06, 169.61, 162.75, 149.59, 147.95, 140.53, 136.58, 129.55, 129.53, 129.33, 127.65, 127.10, 126.25, 121.78, 121.54, 52.85, 51.69, 32.53, 30.05, 21.30; **IR** (neat):  $\nu_{\text{max}} = 2950, 1754, 1731, 1502, 1194, 1166$   $\text{cm}^{-1}$ ; **HRMS** (EI)  $m/z$ : calc. for  $\text{C}_{22}\text{H}_{21}\text{NO}_4$   $[\text{M}]^+$  363.1471, found 363.1473;  $R_f$  0.17 (Hex/EtOAc, 4/1).

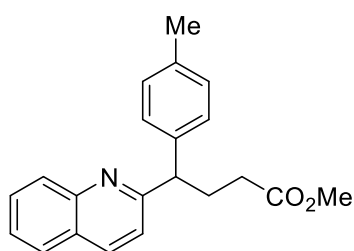

methyl 4-(quinolin-2-yl)-4-(p-tolyl)butanoate, **3e**: yellowish oil;  $^1\text{H NMR}$  (600 MHz,  $\text{CDCl}_3$ )  $\delta$  8.16 (d,  $J = 8.4$  Hz, 1H), 7.98 (d,  $J = 8.5$  Hz, 1H), 7.73 (d,  $J = 8.1$  Hz, 1H), 7.70 (dd,  $J = 8.5, 6.9$  Hz, 1H), 7.48 (dd,  $J = 8.1, 6.9$  Hz, 1H), 7.31 (d,  $J = 8.0$  Hz, 2H), 7.24 (d,  $J = 8.4$  Hz, 1H), 7.13 (d,  $J = 8.0$  Hz, 2H), 4.30 (t,  $J = 7.7$  Hz, 1H), 3.65 (s, 3H), 2.83 – 2.75 (m, 1H), 2.63 – 2.51 (m, 1H), 2.45 – 2.40 (m, 2H), 2.32 (s, 3H);  $^{13}\text{C NMR}$  (151 MHz,  $\text{CDCl}_3$ )  $\delta$  174.03, 163.27, 147.83, 139.89, 136.31, 136.31, 129.46, 129.40, 129.31, 128.16, 127.51, 126.94, 126.01, 121.38, 53.00, 51.51, 32.52, 29.81, 21.07; **IR** (neat):  $\nu_{\text{max}} = 3019, 2949, 1735, 1600, 1503, 1435, 1239, 1153$   $\text{cm}^{-1}$ ;  $R_f$  0.44 (Hex/EtOAc, 4/1).

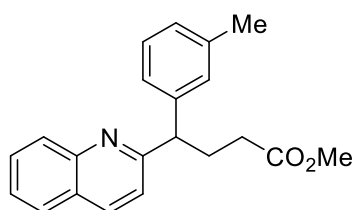

methyl 4-(quinolin-2-yl)-4-(m-tolyl)butanoate, **3f**: yellow oil;  $^1\text{H NMR}$  (600 MHz,  $\text{CDCl}_3$ )  $\delta$  8.11 (d,  $J = 8.4$  Hz, 1H), 7.99 (d,  $J = 8.5$  Hz, 1H), 7.74 (d,  $J = 8.1$  Hz, 1H), 7.69 (dd,  $J = 8.5, 6.9$  Hz, 1H), 7.49 (dd,  $J = 8.1, 6.9$  Hz, 1H), 7.23 (d,  $J = 8.4$  Hz, 1H), 7.19 – 7.14 (m, 3H), 7.03 – 6.99 (m, 1H), 4.25 (t,  $J = 7.7$  Hz, 1H), 3.63 (s, 3H), 2.76 – 2.69 (m, 1H), 2.55 – 2.47 (m, 1H), 2.42 – 2.33 (m, 2H), 2.30 (s, 3H);  $^{13}\text{C NMR}$  (151 MHz,  $\text{CDCl}_3$ )  $\delta$  174.24, 163.30, 147.95, 142.93, 138.42, 136.48, 129.63, 129.46, 129.19, 128.70, 127.71, 127.65, 127.11, 126.18, 125.40, 121.53, 53.50, 51.70, 32.68, 29.87, 21.67; **IR** (neat):  $\nu_{\text{max}} = 3018, 2949, 1736, 1600, 1503, 1435, 1200, 1171$   $\text{cm}^{-1}$ ; **HRMS** (EI)  $m/z$ : calc. for  $\text{C}_{21}\text{H}_{21}\text{NO}_2$   $[\text{M}]^+$  319.1572, found 319.1568;  $R_f$  0.43 (Hex/EtOAc, 4/1).

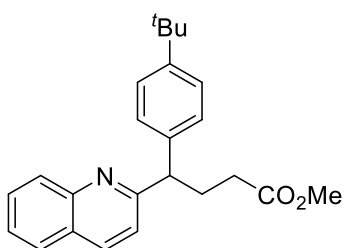

methyl 4-(4-(tert-butyl)phenyl)-4-(quinolin-2-yl)butanoate, **3g**: yellow oil;  $^1\text{H NMR}$  (600 MHz,  $\text{CDCl}_3$ )  $\delta$  8.13 (d,  $J = 8.5$  Hz, 1H), 7.99 (d,  $J = 8.5$  Hz, 1H), 7.73 (d,  $J = 8.1$  Hz, 1H), 7.69 (dd,  $J = 8.5, 6.9$  Hz, 1H), 7.48 (dd,  $J = 8.1, 6.9$  Hz, 1H), 7.32 (s, 4H), 7.26 (d,  $J = 8.5$  Hz, 1H), 4.28 (t,  $J = 7.8$  Hz, 1H), 3.63 (s, 3H), 2.79 – 2.71 (m, 1H), 2.59 – 2.51 (m, 1H), 2.43 – 2.36 (m, 2H), 1.29 (s, 9H);  $^{13}\text{C NMR}$  (151 MHz,  $\text{CDCl}_3$ )  $\delta$  174.16, 163.39, 149.61, 147.93, 139.81, 136.40, 129.55, 129.40, 127.94, 127.59, 127.05, 126.09, 125.65, 121.48, 53.10, 51.62, 34.53, 32.68, 31.51, 29.95; **IR** (neat):  $\nu_{\text{max}} = 3055, 2960, 1736, 1600, 1503, 1434, 1238, 1156$   $\text{cm}^{-1}$ ; **HRMS** (EI)  $m/z$ : calc. for  $\text{C}_{24}\text{H}_{27}\text{NO}_2$   $[\text{M}]^+$  361.2042, found 361.2044;  $R_f$  0.45 (Hex/EtOAc, 4/1).

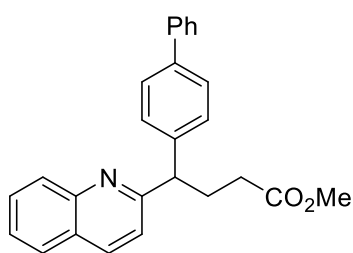

methyl 4-([1,1'-biphenyl]-4-yl)-4-(quinolin-2-yl)butanoate, **3h**: yellowish oil; **<sup>1</sup>H NMR (600 MHz, CDCl<sub>3</sub>)** δ 8.14 (d, *J* = 7.4 Hz, 1H), 8.03 (d, *J* = 8.4 Hz, 1H), 7.76 (d, *J* = 8.0 Hz, 1H), 7.71 (dd, *J* = 8.0, 7.3 Hz, 1H), 7.55 (d, *J* = 8.2 Hz, 2H), 7.53 (d, *J* = 8.1 Hz, 2H), 7.50 (t, *J* = 7.2 Hz, 1H), 7.45 (d, *J* = 8.1 Hz, 2H), 7.41 (dd, *J* = 8.2, 7.2 Hz, 2H), 7.32 (dd, *J* = 7.4, 7.3 Hz, 1H), 7.28 (d, *J* = 8.4 Hz, 1H), 4.35 (t, *J* = 8.0 Hz, 1H), 3.64 (s, 3H), 2.82 – 2.73 (m, 1H), 2.62 – 2.53 (m, 1H), 2.47 – 2.36 (m, 2H); **<sup>13</sup>C NMR (151 MHz, CDCl<sub>3</sub>)** δ 174.14, 163.05, 142.05, 140.99, 139.83, 136.63, 136.61, 129.58, 129.54, 128.90, 128.80, 127.66, 127.53, 127.35, 127.18, 127.12, 126.25, 121.52, 53.16, 51.70, 32.63, 29.97; **IR (neat)**:  $\nu_{\max}$  = 3028, 2924, 2853, 1733, 1202 cm<sup>-1</sup>; **HRMS (EI) *m/z***: calc. for C<sub>26</sub>H<sub>23</sub>NO<sub>2</sub> [M]<sup>+</sup> 381.1729, found 381.1727; **R<sub>f</sub>** 0.40 (Hex/EtOAc, 4/1).

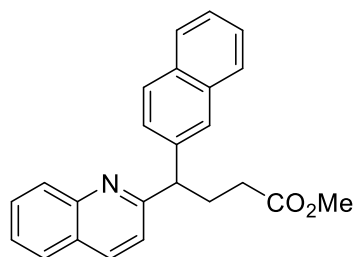

methyl 4-(naphthalen-2-yl)-4-(quinolin-2-yl)butanoate, **3i**: yellowish oil; **<sup>1</sup>H NMR (600 MHz, CDCl<sub>3</sub>)** δ 8.16 (d, *J* = 7.9 Hz, 1H), 7.99 (d, *J* = 8.4 Hz, 1H), 7.84 (s, 1H), 7.81 (d, *J* = 8.0 Hz, 1H), 7.78 (d, *J* = 8.2 Hz, 1H), 7.76 (d, *J* = 8.2 Hz, 1H), 7.74 (d, *J* = 8.2 Hz, 1H), 7.72 (dd, *J* = 8.5, 6.4 Hz, 1H), 7.51 (dd, *J* = 7.9, 6.4 Hz, 1H), 7.50 (d, *J* = 8.5 Hz, 1H), 7.46 (dd, *J* = 8.2, 6.9 Hz, 1H), 7.43 (dd, *J* = 8.0, 6.9 Hz, 1H), 7.27 (d, *J* = 8.4 Hz, 1H), 4.48 (t, *J* = 7.5 Hz, 1H), 3.64 (s, 3H), 2.88 – 2.80 (m, 1H), 2.70 – 2.62 (m, 1H), 2.49 – 2.38 (m, 2H); **<sup>13</sup>C NMR (151 MHz, CDCl<sub>3</sub>)** 174.16, 163.03, 140.42, 136.60, 133.73, 132.62, 129.59, 129.56, 128.55, 127.97, 127.79, 127.66, 127.10, 126.85, 126.84, 126.76, 126.28, 126.26, 125.85, 121.61, 53.50, 51.69, 32.61, 29.71; **IR (neat)**:  $\nu_{\max}$  = 3054, 2949, 1731, 1598, 1503, 1198, 1167 cm<sup>-1</sup>; **HRMS (EI) *m/z***: calc. for C<sub>24</sub>H<sub>21</sub>NO<sub>2</sub> [M]<sup>+</sup> 355.1572, found 355.1570; **R<sub>f</sub>** 0.41 (Hex/EtOAc, 4/1).

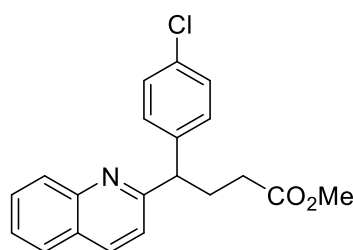

methyl 4-(4-chlorophenyl)-4-(quinolin-2-yl)butanoate, **3j**: yellowish oil; **<sup>1</sup>H NMR (600 MHz, CDCl<sub>3</sub>)** δ 8.10 (d, *J* = 8.5 Hz, 1H), 8.02 (d, *J* = 8.5 Hz, 1H), 7.75 (d, *J* = 8.1 Hz, 1H), 7.70 (dd, *J* = 8.5, 6.9 Hz, 1H), 7.50 (dd, *J* = 8.1, 6.9 Hz, 1H), 7.32 (d, *J* = 8.5 Hz, 2H), 7.25 (d, *J* = 8.5 Hz, 2H), 7.20 (d, *J* = 8.5 Hz, 1H), 4.27 (t, *J* = 7.8 Hz, 1H), 3.63 (s, 3H), 2.75 – 2.68 (m, 1H), 2.54 – 2.44 (m, 1H), 2.41 – 2.31 (m, 2H); **<sup>13</sup>C NMR (151 MHz, CDCl<sub>3</sub>)** δ 174.02, 162.52, 147.95, 141.53, 136.74, 132.77, 129.76, 129.66, 129.55, 128.94, 127.68, 127.12, 126.38, 121.41, 52.76, 51.75, 32.46, 29.97; **IR (neat)**:  $\nu_{\max}$  = 3044, 2950, 1735, 1600, 1503, 1489, 1231, 1153, 826 cm<sup>-1</sup>; **HRMS (EI) *m/z***: calc. for C<sub>20</sub>H<sub>18</sub>ClNO<sub>2</sub> [M]<sup>+</sup> 339.1026, found 339.1028; **R<sub>f</sub>** 0.36 (Hex/EtOAc, 4/1).

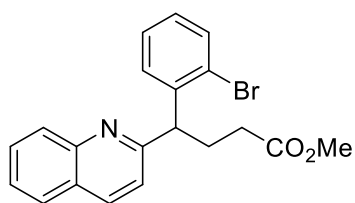

methyl 4-(2-bromophenyl)-4-(quinolin-2-yl)butanoate, **3k**: yellow solid; melting point 96~101 °C;  $^1\text{H NMR}$  (600 MHz,  $\text{CDCl}_3$ )  $\delta$  8.14 (d,  $J = 8.4$  Hz, 1H), 7.98 (d,  $J = 8.4$  Hz, 1H), 7.74 (d,  $J = 8.1$  Hz, 1H), 7.70 (dd,  $J = 8.4, 6.9$  Hz, 1H), 7.58 (d,  $J = 8.0$  Hz, 1H), 7.49 (dd,  $J = 8.1, 6.9$  Hz, 2H), 7.41 (d,  $J = 7.9$  Hz, 1H), 7.24 (d,  $J = 8.4$  Hz, 1H), 7.20 (dd,  $J = 7.9, 7.3$  Hz, 1H), 7.04 (dd,  $J = 8.0, 7.3$  Hz, 1H), 4.91 (t,  $J = 7.5$  Hz, 1H), 3.65 (s, 3H), 2.89 – 2.80 (m, 1H), 2.54 – 2.45 (m, 2H), 2.45 – 2.36 (m, 1H);  $^{13}\text{C NMR}$  (151 MHz,  $\text{CDCl}_3$ )  $\delta$  174.03, 161.85, 148.03, 142.45, 136.33, 132.99, 129.93, 129.68, 129.40, 128.30, 127.96, 127.62, 127.11, 126.22, 125.13, 122.36, 51.68, 50.94, 32.43, 29.74; **IR** (neat):  $\nu_{\text{max}} = 3058, 2949, 1735, 1600, 1436, 1237, 1153, 753$   $\text{cm}^{-1}$ ; **HRMS** (EI)  $m/z$ : calc. for  $\text{C}_{20}\text{H}_{18}\text{BrNO}_2$   $[\text{M}]^+$  383.0521, found 383.0520, 385.0503;  $R_f$  0.48 (Hex/EtOAc, 4/1).

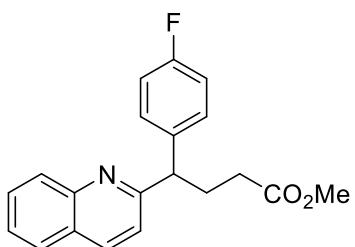

methyl 4-(4-fluorophenyl)-4-(quinolin-2-yl)butanoate, **3l**: yellow oil;  $^1\text{H NMR}$  (600 MHz,  $\text{CDCl}_3$ )  $\delta$  8.10 (d,  $J = 8.6$  Hz, 1H), 8.01 (d,  $J = 8.6$  Hz, 1H), 7.75 (d,  $J = 8.1$  Hz, 1H), 7.70 (dd,  $J = 8.5, 6.9$  Hz, 1H), 7.49 (dd,  $J = 8.1, 6.9$  Hz, 1H), 7.34 (dd,  $J = 8.7, ^4J_{\text{H-F}} = 5.4$  Hz, 2H), 7.20 (d,  $J = 8.5$  Hz, 1H), 6.97 (dd,  $^3J_{\text{H-F}} = 8.7, J = 8.7$  Hz, 2H), 4.27 (t,  $J = 7.8$  Hz, 1H), 3.63 (s, 3H), 2.76 – 2.69 (m, 1H), 2.52 – 2.45 (m, 1H), 2.39 – 2.33 (m, 2H);  $^{13}\text{C NMR}$  (151 MHz,  $\text{CDCl}_3$ )  $\delta$  174.06, 162.83, 161.90 (d,  $^1J_{\text{C-F}} = 245.3$  Hz), 147.98, 138.77, 138.75, 136.61, 129.83 (d,  $^3J_{\text{C-F}} = 7.8$  Hz), 129.58, 127.66, 127.09, 126.30, 121.42, 115.58 (d,  $^2J_{\text{C-F}} = 21.1$  Hz), 52.67, 51.72, 32.50, 30.14; **IR** (neat):  $\nu_{\text{max}} = 3043, 2950, 1732, 1504, 1220, 1158, 825$   $\text{cm}^{-1}$ ; **HRMS** (EI)  $m/z$ : calc. for  $\text{C}_{20}\text{H}_{18}\text{FNO}_2$   $[\text{M}]^+$  323.1322, found 323.1323;  $R_f$  0.35 (Hex/EtOAc, 4/1).

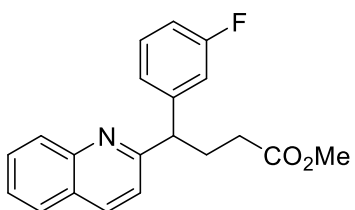

methyl 4-(3-fluorophenyl)-4-(quinolin-2-yl)butanoate, **3m**: yellow oil;  $^1\text{H NMR}$  (600 MHz,  $\text{CDCl}_3$ )  $\delta$  8.11 (d,  $J = 8.5$  Hz, 1H), 8.03 (d,  $J = 8.5$  Hz, 1H), 7.76 (d,  $J = 8.1$  Hz, 1H), 7.71 (dd,  $J = 8.5, 6.9$  Hz, 1H), 7.50 (dd,  $J = 8.1, 6.9$  Hz, 1H), 7.24 (ddd,  $J = 8.2, 7.8, ^4J_{\text{H-F}} = 6.0$  Hz, 1H), 7.22 (d,  $J = 8.5$  Hz, 1H), 7.15 (d,  $J = 7.8$  Hz, 1H), 7.11 (d,  $^3J_{\text{H-F}} = 10.1$  Hz, 1H), 6.89 (dd,  $^3J_{\text{H-F}} = 8.6, J = 8.2$  Hz, 1H), 4.30 (t,  $J = 7.8$  Hz, 1H), 3.64 (s, 3H), 2.76 – 2.69 (m, 1H), 2.54 – 2.47 (m, 1H), 2.40 – 2.32 (m, 2H);  $^{13}\text{C NMR}$  (151 MHz,  $\text{CDCl}_3$ )  $\delta$  174.01, 163.20 (d,  $^1J_{\text{C-F}} = 246.2$  Hz), 162.36, 145.61 (d,  $^3J_{\text{C-F}} = 6.7$  Hz), 136.76, 130.21 (d,  $^3J_{\text{C-F}} = 8.4$  Hz), 129.67, 129.59, 127.68, 127.16, 126.41, 124.14 (d,  $^4J_{\text{C-F}} = 2.9$  Hz), 121.42, 115.26 (d,  $^2J_{\text{C-F}} = 21.7$  Hz), 113.87 (d,  $^2J_{\text{C-F}} = 21.1$  Hz), 113.80, 53.10, 51.76, 32.47, 29.94; **IR** (neat):  $\nu_{\text{max}} = 3059, 2926, 1735, 1589, 1487, 1241, 1140, 833$   $\text{cm}^{-1}$ ; **HRMS** (EI)  $m/z$ : calc. for  $\text{C}_{20}\text{H}_{18}\text{FNO}_2$   $[\text{M}]^+$  323.1322, found 323.1319;  $R_f$  0.38 (Hex/EtOAc, 4/1).



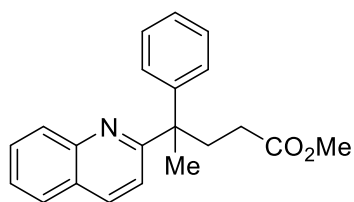

methyl 4-phenyl-4-(quinolin-2-yl)pentanoate, **3n**: yellowish solid; melting point 79~81 °C; **<sup>1</sup>H NMR (600 MHz, CDCl<sub>3</sub>)** δ 8.16 (d, *J* = 8.4 Hz, 1H), 7.94 (d, *J* = 8.7 Hz, 1H), 7.75 (d, *J* = 8.0 Hz, 1H), 7.71 (dd, *J* = 8.4, 6.9 Hz, 1H), 7.51 (dd, *J* = 8.0, 6.9 Hz, 1H), 7.30 (dd, *J* = 8.7, 7.1 Hz, 2H), 7.26 (d, *J* = 8.7 Hz, 2H), 7.22 (t, *J* = 7.1 Hz, 1H), 7.05 (d, *J* = 8.7 Hz, 1H), 3.63 (s, 3H), 2.82 – 2.68 (m, 2H), 2.36 – 2.30 (m, 1H), 2.28 – 2.22 (m, 1H), 1.81 (s, 3H); **<sup>13</sup>C NMR (151 MHz, CDCl<sub>3</sub>)** δ 174.66, 166.91, 147.52, 147.14, 135.84, 129.83, 129.26, 128.45, 127.42, 126.66, 126.41, 126.26, 121.37, 51.64, 49.13, 35.81, 30.31, 26.11; **IR (neat)**:  $\nu_{\max}$  = 3058, 2972, 1735, 1600, 1500, 1436, 1195, 1123 cm<sup>-1</sup>; **R<sub>f</sub>** 0.51 (Hex/EtOAc, 4/1).

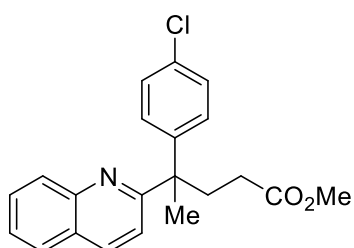

methyl 4-(4-chlorophenyl)-4-(quinolin-2-yl)pentanoate, **3o**: colorless oil; **<sup>1</sup>H NMR (600 MHz, CDCl<sub>3</sub>)** δ 8.11 (d, *J* = 8.5 Hz, 1H), 7.96 (d, *J* = 8.7 Hz, 1H), 7.75 (d, *J* = 8.0 Hz, 1H), 7.71 (dd, *J* = 8.5, 6.9 Hz, 1H), 7.52 (dd, *J* = 8.0, 6.9 Hz, 1H), 7.25 (d, *J* = 8.7 Hz, 2H), 7.17 (d, *J* = 8.7 Hz, 2H), 7.02 (d, *J* = 8.7 Hz, 1H), 3.61 (s, 3H), 2.72 (ddd, *J* = 13.9, 11.1, 5.5 Hz, 1H), 2.65 (ddd, *J* = 13.9, 11.1, 5.3 Hz, 1H), 2.28 (ddd, *J* = 16.2, 11.1, 5.3 Hz, 1H), 2.20 (ddd, *J* = 16.2, 11.1, 5.5 Hz, 1H), 1.77 (s, 3H); **<sup>13</sup>C NMR (151 MHz, CDCl<sub>3</sub>)** δ 174.52, 166.26, 147.19, 146.20, 136.12, 132.35, 129.86, 129.45, 128.88, 128.60, 127.48, 126.71, 126.46, 121.06, 51.74, 48.86, 35.79, 30.25, 26.07; **IR (neat)**:  $\nu_{\max}$  = 3059, 2949, 1735, 1491, 1168, 1012, 758 cm<sup>-1</sup>; **HRMS (EI) *m/z***: calc. for C<sub>21</sub>H<sub>20</sub>ClNO<sub>2</sub> [M]<sup>+</sup> 353.1183, found 353.1186; **R<sub>f</sub>** 0.51 (Hex/EtOAc, 4/1).

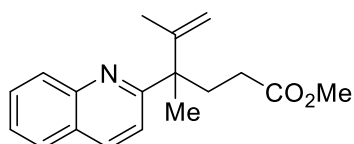

methyl 4,5-dimethyl-4-(quinolin-2-yl)hex-5-enoate, **3p**: colorless oil; **<sup>1</sup>H NMR (600 MHz, CDCl<sub>3</sub>)** δ 8.08 (d, *J* = 8.4 Hz, 1H), 8.02 (d, *J* = 8.7 Hz, 1H), 7.76 (d, *J* = 8.0 Hz, 1H), 7.67 (dd, *J* = 8.4, 7.0 Hz, 1H), 7.49 (dd, *J* = 8.0, 7.0 Hz, 1H), 7.37 (d, *J* = 8.7 Hz, 1H), 5.07 (s, 2H), 3.65 (s, 3H), 2.54 (ddd, *J* = 13.9, 11.6, 5.4 Hz, 1H), 2.42 (ddd, *J* = 13.9, 11.6, 4.8 Hz, 1H), 2.32 (ddd, *J* = 16.2, 11.6, 4.8 Hz, 1H), 2.21 (ddd, *J* = 16.2, 11.6, 5.4 Hz, 1H), 1.53 (s, 3H), 1.49 (s, 3H); **<sup>13</sup>C NMR (151 MHz, CDCl<sub>3</sub>)** δ 174.95, 165.73, 149.88, 147.51, 136.07, 129.83, 129.20, 127.44, 126.80, 126.18, 120.00, 112.58, 51.73, 50.34, 32.33, 30.14, 24.05, 20.51; **IR (neat)**:  $\nu_{\max}$  = 2972, 1736, 1600, 1171 cm<sup>-1</sup>; **R<sub>f</sub>** 0.48 (Hex/EtOAc, 4/1).

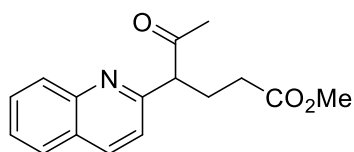

methyl 5-oxo-4-(quinolin-2-yl)hexanoate, **3q**: yellow oil; **<sup>1</sup>H NMR (600 MHz, CDCl<sub>3</sub>)** δ 8.14 (d, *J* = 8.5 Hz, 1H), 8.07 (d, *J* = 8.5 Hz, 1H), 7.80 (d, *J* = 8.1 Hz, 1H), 7.71 (dd, *J* = 8.5, 6.9 Hz, 1H), 7.53 (dd, *J* = 8.1, 6.9 Hz, 1H), 7.43 (d, *J* = 8.5 Hz, 1H), 4.04 (t, *J* = 7.4 Hz, 1H), 3.69 (s, 3H), 2.56 – 2.41 (m, 3H), 2.35 – 2.28 (m, 1H), 2.09 (s, 3H); **<sup>13</sup>C NMR (151 MHz, CDCl<sub>3</sub>)** δ 207.98,

173.25, 158.52, 148.00, 137.14, 129.83, 129.58, 127.73, 127.45, 126.71, 120.44, 53.70, 52.42, 41.25, 30.17, 26.11; **IR (neat)**:  $\nu_{\max}$  = 3060, 2952, 1735, 1714, 1260, 1159  $\text{cm}^{-1}$ ; **HRMS (EI)**  $m/z$ : calc. for  $\text{C}_{16}\text{H}_{17}\text{NO}_3$   $[\text{M}]^+$  271.1208, found 271.1207; **R<sub>f</sub>** 0.24 (Hex/EtOAc, 1/1).

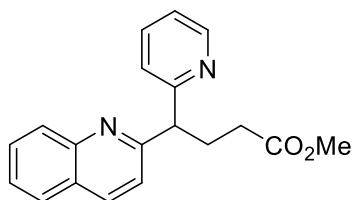

methyl 4-(pyridin-2-yl)-4-(quinolin-2-yl)butanoate, **3r**: yellow oil; **<sup>1</sup>H NMR (600 MHz, CDCl<sub>3</sub>)**  $\delta$  8.58 (ddd,  $J$  = 4.9, 1.7, 0.8 Hz, 1H), 8.09 (d,  $J$  = 8.4 Hz, 1H), 8.03 (d,  $J$  = 8.5 Hz, 1H), 7.75 (d,  $J$  = 8.0 Hz, 1H), 7.68 (dd,  $J$  = 8.4, 6.9 Hz, 1H), 7.56 (ddd,  $J$  = 7.9, 7.4, 1.7 Hz, 1H), 7.48 (dd,  $J$  = 8.0, 6.9 Hz, 1H), 7.47 (d,  $J$  = 8.5 Hz, 1H), 7.36 (ddd,  $J$  = 7.9, 1.1, 0.8 Hz, 1H), 7.11 (ddd,  $J$  = 7.4, 4.9, 1.1 Hz, 1H), 4.49 (t,  $J$  = 7.8 Hz, 1H), 3.62 (s, 3H), 2.73 – 2.68 (m, 2H), 2.42 – 2.31 (m, 2H); **<sup>13</sup>C NMR (151 MHz, CDCl<sub>3</sub>)**  $\delta$  173.96, 162.35, 161.89, 149.54, 147.99, 136.75, 136.63, 129.52, 129.51, 127.67, 127.28, 126.29, 123.71, 121.98, 121.34, 56.04, 51.73, 32.61, 29.46; **IR (neat)**:  $\nu_{\max}$  = 3058, 2950, 1734, 1588, 1433, 1217, 1151  $\text{cm}^{-1}$ ; **HRMS (EI)**  $m/z$ : calc. for  $\text{C}_{19}\text{H}_{18}\text{N}_2\text{O}_2$   $[\text{M}]^+$  306.1368, found 306.1367; **R<sub>f</sub>** 0.16 (Hex/EtOAc, 1/1).

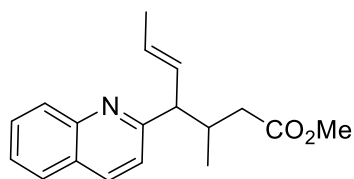

methyl 3-methyl-4-(quinolin-2-yl)hept-5-enoate (diastereoisomers, 1 : 0.36 : 0.13), **3s**: colorless oil; **<sup>1</sup>H NMR (600 MHz, CDCl<sub>3</sub>)**  $\delta$  8.08 (d,  $J$  = 8.4 Hz, 1H), 8.07 (d,  $J$  = 8.4 Hz, 1H), 8.07 (d,  $J$  = 8.4 Hz, 1H), 8.05 (dd,  $J$  = 7.9, 1.3 Hz, 3H), 7.76 (dd,  $J$  = 8.3, 0.9 Hz, 3H), 7.67 (ddd,  $J$  = 8.3, 6.9, 1.3 Hz, 3H), 7.48 (ddd,  $J$  = 7.9, 6.9, 0.9 Hz, 3H), 7.31 (d,  $J$  = 8.4 Hz, 1H), 7.30 (d,  $J$  = 8.4 Hz, 1H), 7.29 (d,  $J$  = 8.4 Hz, 1H), 5.82 – 5.73 (m, 2H), 5.77 (ddq,  $J$  = 15.0, 9.4, 1.6 Hz, 1H), 5.73 – 5.65 (m, 2H), 5.63 (dq,  $J$  = 15.0, 6.5 Hz, 1H), 3.90 – 3.85 (m, 1H), 3.67 (s, 3H), 3.55 (s, 3H), 3.55 (s, 3H), 3.43 (dd,  $J$  = 9.4, 8.7 Hz, 1H), 3.39 – 3.34 (m, 1H), 2.64 (ddqd,  $J$  = 9.3, 8.7, 6.7, 4.5 Hz, 1H), 2.67 – 2.59 (m, 2H), 2.30 – 2.24 (m, 2H), 2.24 (dd,  $J$  = 15.3, 4.5 Hz, 1H), 2.18 – 2.11 (m, 2H), 2.10 (dd,  $J$  = 15.3, 9.3 Hz, 1H), 1.70 (dd,  $J$  = 6.5, 1.6 Hz, 3H), 1.72 – 1.68 (m, 3H), 1.67 (dd,  $J$  = 6.2, 1.4 Hz, 3H), 1.04 (d,  $J$  = 6.7 Hz, 3H), 1.03 (d,  $J$  = 6.7 Hz, 3H), 0.81 (d,  $J$  = 6.7 Hz, 3H); **<sup>13</sup>C NMR (151 MHz, CDCl<sub>3</sub>)**  $\delta$  173.76, 173.74, 173.72, 163.78, 163.70, 163.68, 148.10, 136.56, 131.95, 131.32, 130.90, 129.48, 129.47, 129.44, 128.38, 127.66, 127.16, 127.14, 126.89, 126.08, 126.07, 126.06, 121.15, 121.13, 58.02, 51.64, 51.62, 51.51, 39.88, 39.76, 39.74, 35.38, 34.78, 34.75, 18.30, 17.81, 17.48, 13.65; **IR (neat)**:  $\nu_{\max}$  = 2952, 1735, 1619, 1165  $\text{cm}^{-1}$ ; **HRMS (EI)**  $m/z$ : calc. for  $\text{C}_{18}\text{H}_{21}\text{NO}_2$   $[\text{M}]^+$  283.1572, found 283.1570; **R<sub>f</sub>** 0.40 (Hex/EtOAc, 4/1).

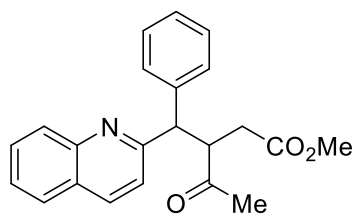

4-phenyl-4-(quinolin-2-yl)pentanoate methyl 4-oxo-3-(phenyl(quinolin-2-yl)methyl)pentanoate, **3t**: yellowish oil;  $^1\text{H NMR}$  (600 MHz,  $\text{CDCl}_3$ )  $\delta$  8.15 (d,  $J = 8.4$  Hz, 1H), 8.00 (d,  $J = 8.4$  Hz, 1H), 7.75 (d,  $J = 8.1$  Hz, 1H), 7.72 (dd,  $J = 8.4, 6.9$  Hz, 1H), 7.51 (dd,  $J = 8.1, 6.9$  Hz, 1H), 7.41 (d,  $J = 8.0$  Hz, 1H), 7.25 (dd,  $J = 8.0, 7.3$  Hz, 1H), 7.21 (d,  $J = 8.4$  Hz, 1H), 7.18 (t,  $J = 7.3$  Hz, 1H), 4.41 (ddd,  $J = 11.0, 11.0, 3.3$  Hz, 1H), 4.24 (d,  $J = 11.0$  Hz, 1H), 3.58 (s, 3H), 2.85 (dd,  $J = 17.3, 11.0$  Hz, 1H), 2.58 (dd,  $J = 17.3, 3.3$  Hz, 1H), 1.82 (s, 3H); **IR** (neat):  $\nu_{\text{max}} = 3061, 2953, 2926, 1735, 1711$   $\text{cm}^{-1}$ ;  $^{13}\text{C NMR}$  (151 MHz,  $\text{CDCl}_3$ )  $\delta$  213.26, 173.19, 160.56, 148.02, 140.46, 136.78, 129.69, 129.64, 129.04, 128.93, 127.70, 127.45, 127.10, 126.47, 122.64, 56.22, 51.82, 51.75, 36.23, 32.88; **IR** (neat):  $\nu_{\text{max}} = 3061, 2953, 2926, 1735, 1711$   $\text{cm}^{-1}$ ; **HRMS** (EI)  $m/z$ : calc. for  $\text{C}_{22}\text{H}_{21}\text{NO}_3$   $[\text{M}]^+$  347.1521, found 347.1524;  $R_f$  0.34 (Hex/EtOAc, 4/1).

## References

- S1. G. Heinrich, S. Schoof, H. Gusten, 9,10-Diphenylanthracene as a fluorescence quantum yield standard., *J. Photochem.*, 1974, **3**, 315–320.
- S2. J. Bae, N. Iqbal, H. S. Hwang, E. J. Cho, Sustainable preparation of photoactive indole-fused tetracyclic molecules: a new class of organophotocatalysts, *Green Chem.*, 2022, **24**, 3985–3992.
- S3. D. F. Chen, Z. Y. Han, Y. P. He, J. Yu, L. Z. Gong, Metal-Free Oxidation/C(sp)-H Functionalization of Unactivated Alkynes Using Pyridine-Oxide as the External Oxidant, *Angew. Chem., Int. Ed.*, 2012, **51**, 12307–12310.
- S4. X. Jiang, P. Boehm, J. F. Hartwig, Stereodivergent Allylation of Azaaryl Acetamides and Acetates by Synergistic Iridium and Copper Catalysis, *J. Am. Chem. Soc.*, 2018, **140**, 1239–1242.
- S5. N. Salaverri, R. Mas-Ballesté, L. Marzo, J. Alemán, Visible light mediated photocatalytic [2 + 2] cycloaddition/ring-opening rearomatization cascade of electron-deficient azaarenes and vinylarenes, *Commun. Chem.*, 2020, **3**, 132.

# NMR Spectra (<sup>1</sup>H NMR, <sup>13</sup>C NMR, and <sup>19</sup>F NMR)

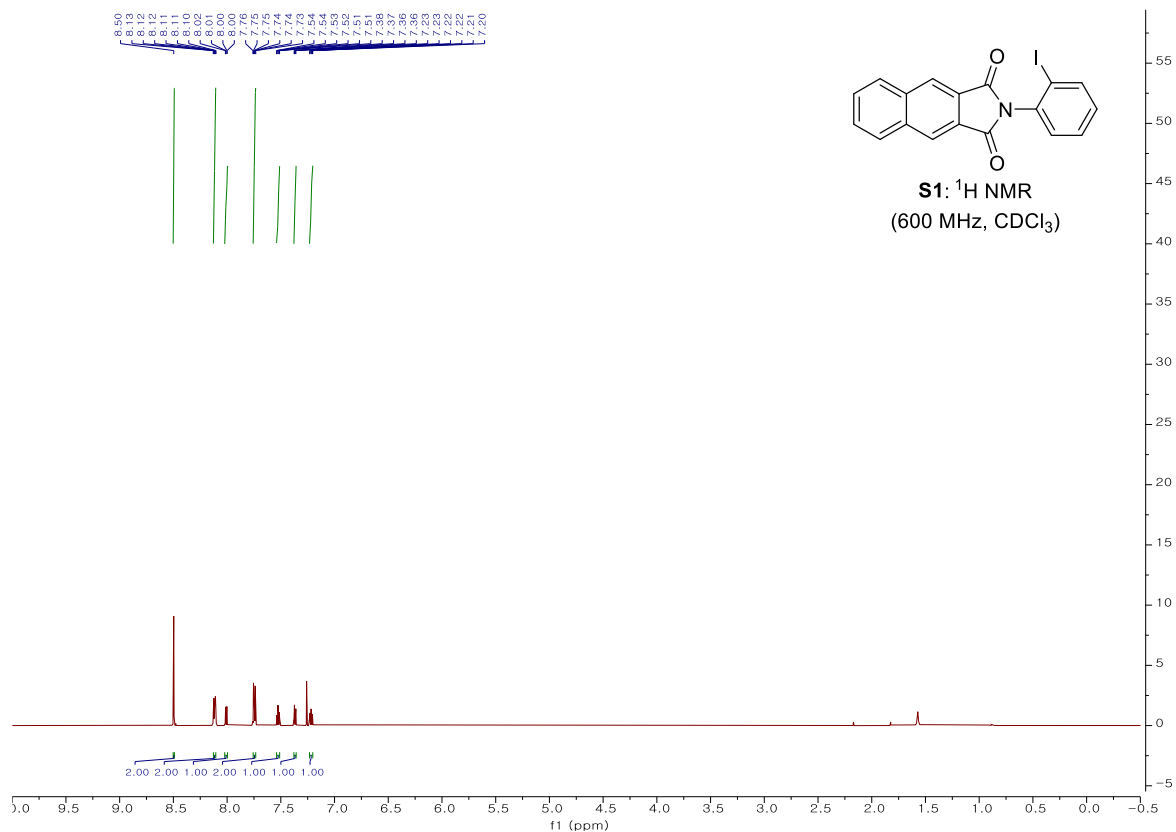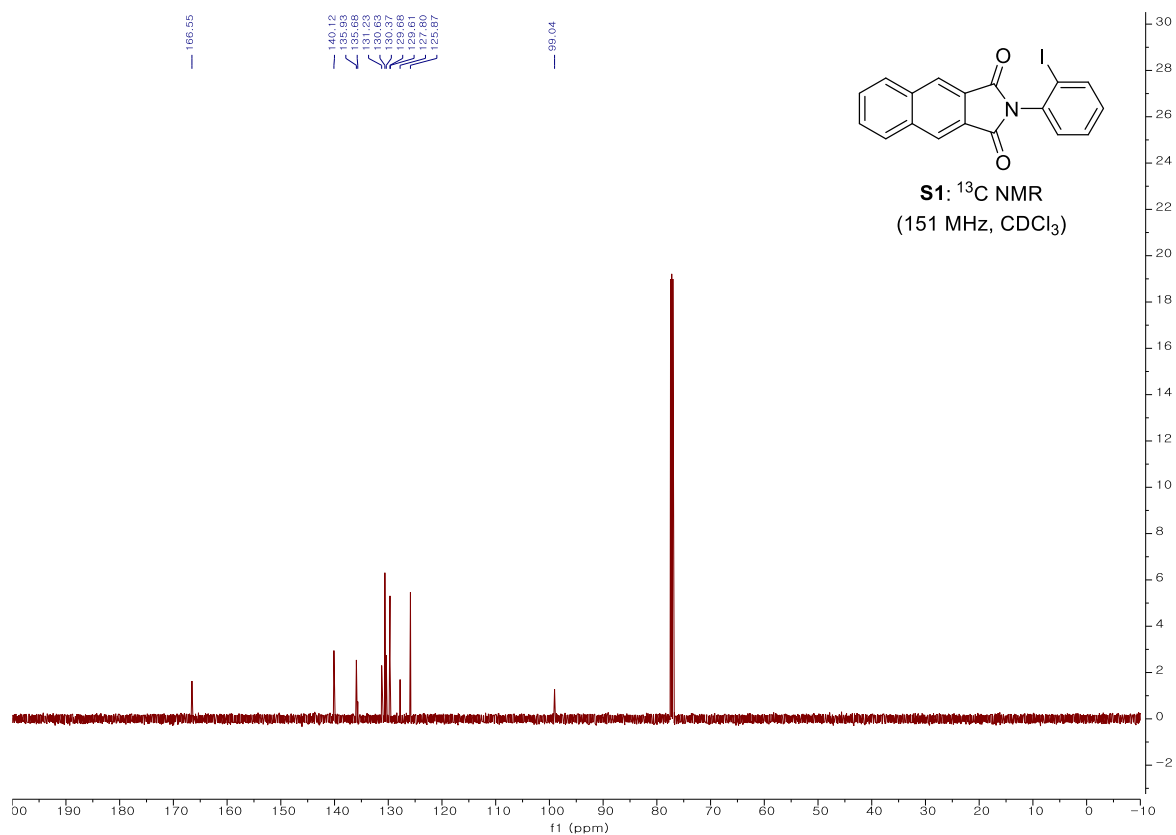

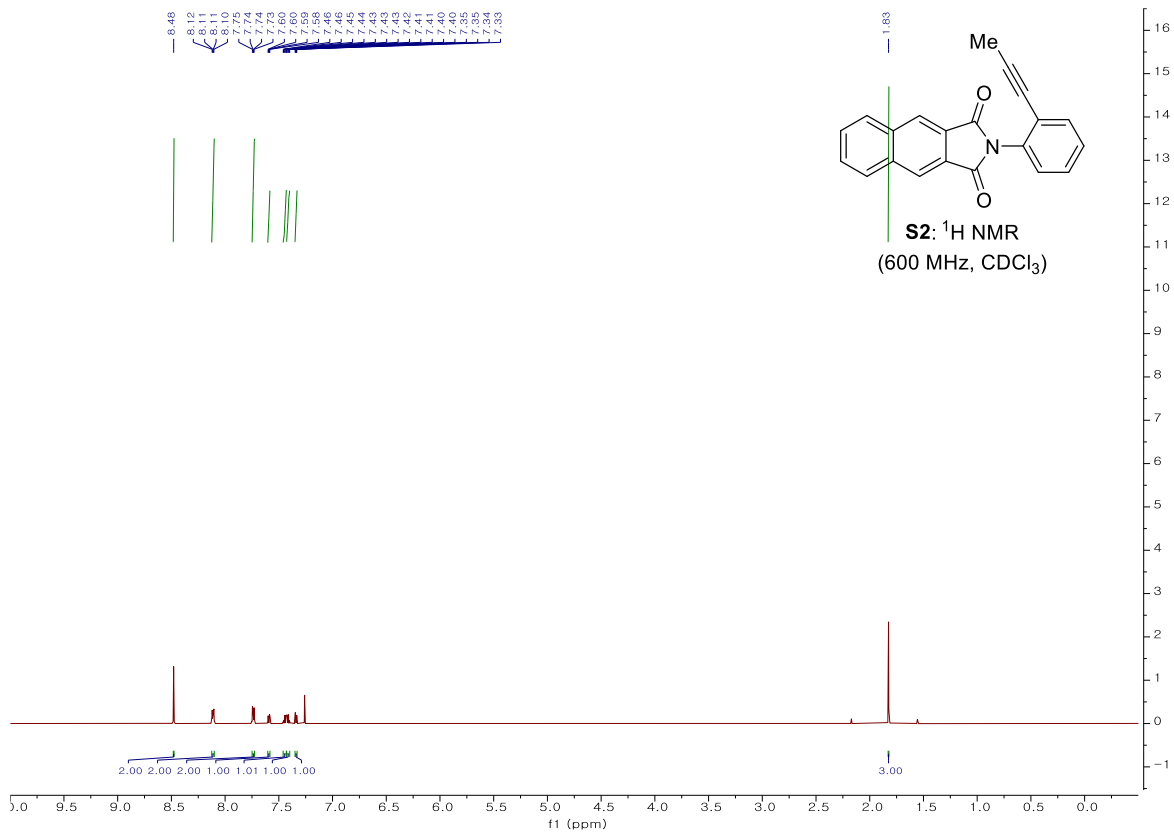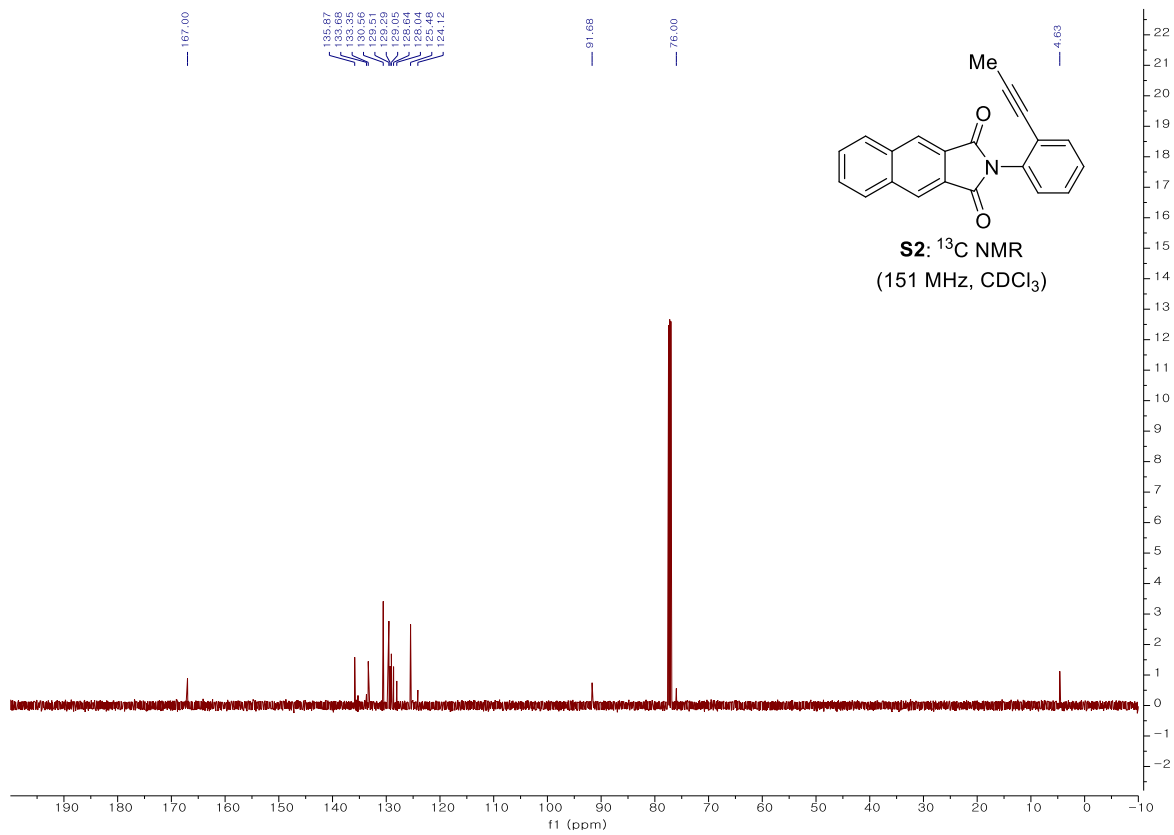

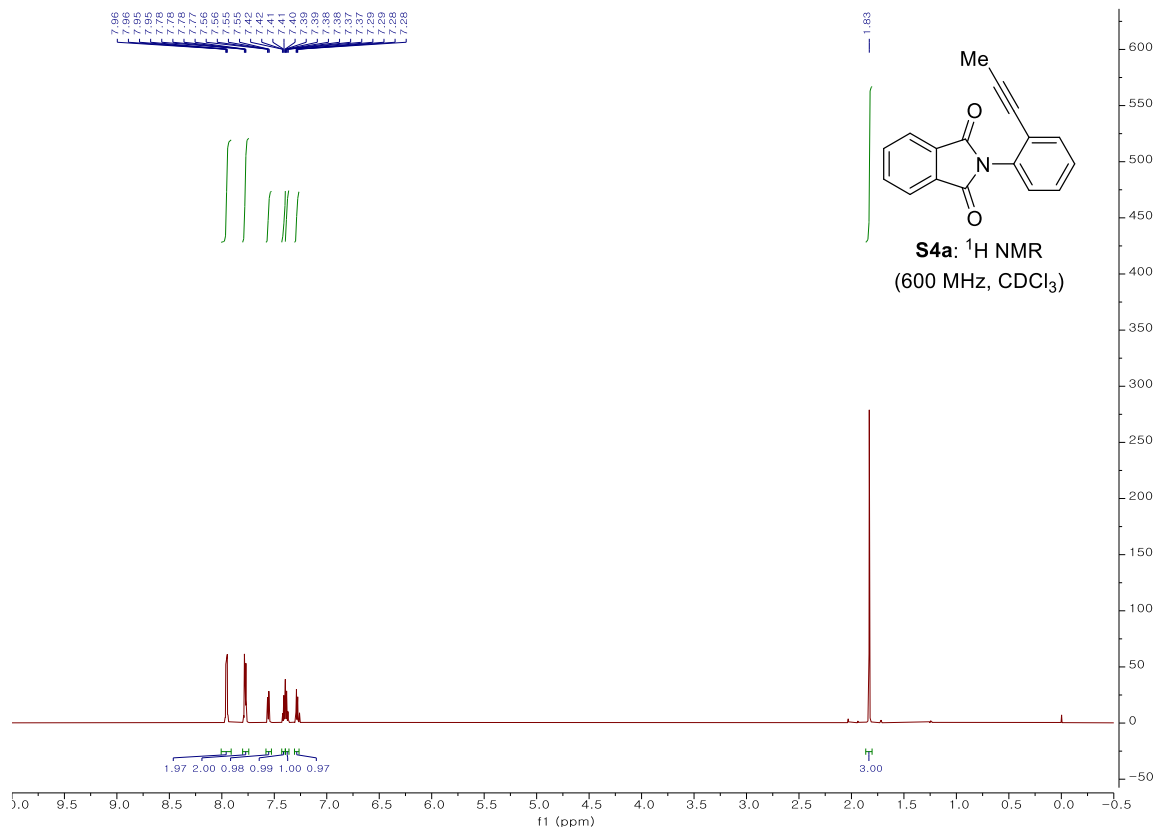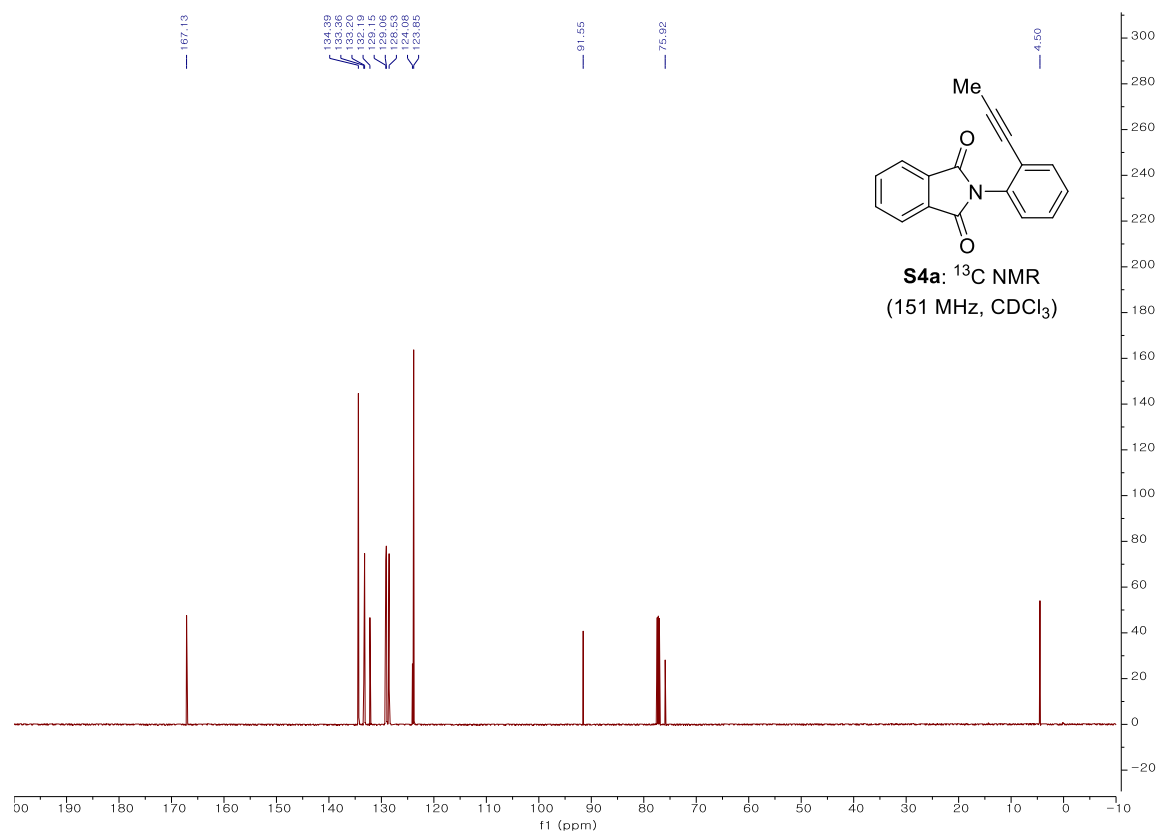

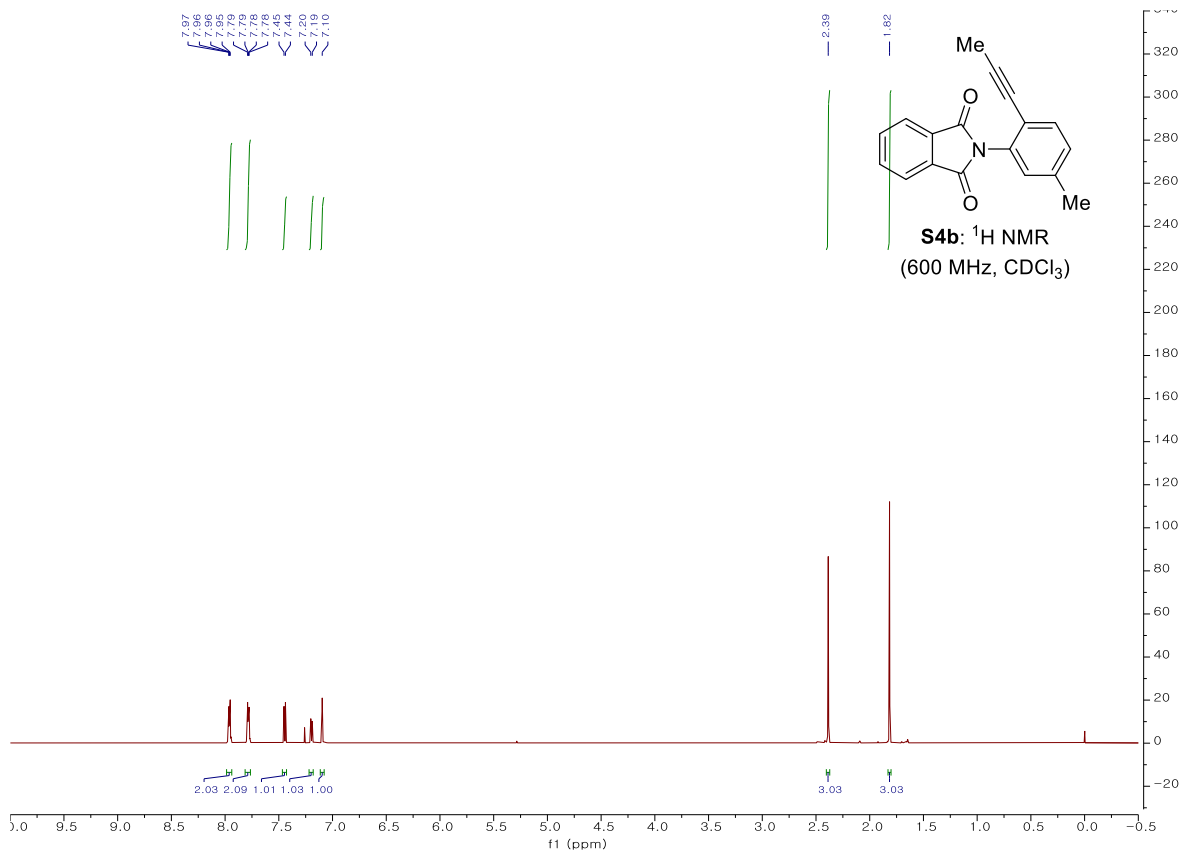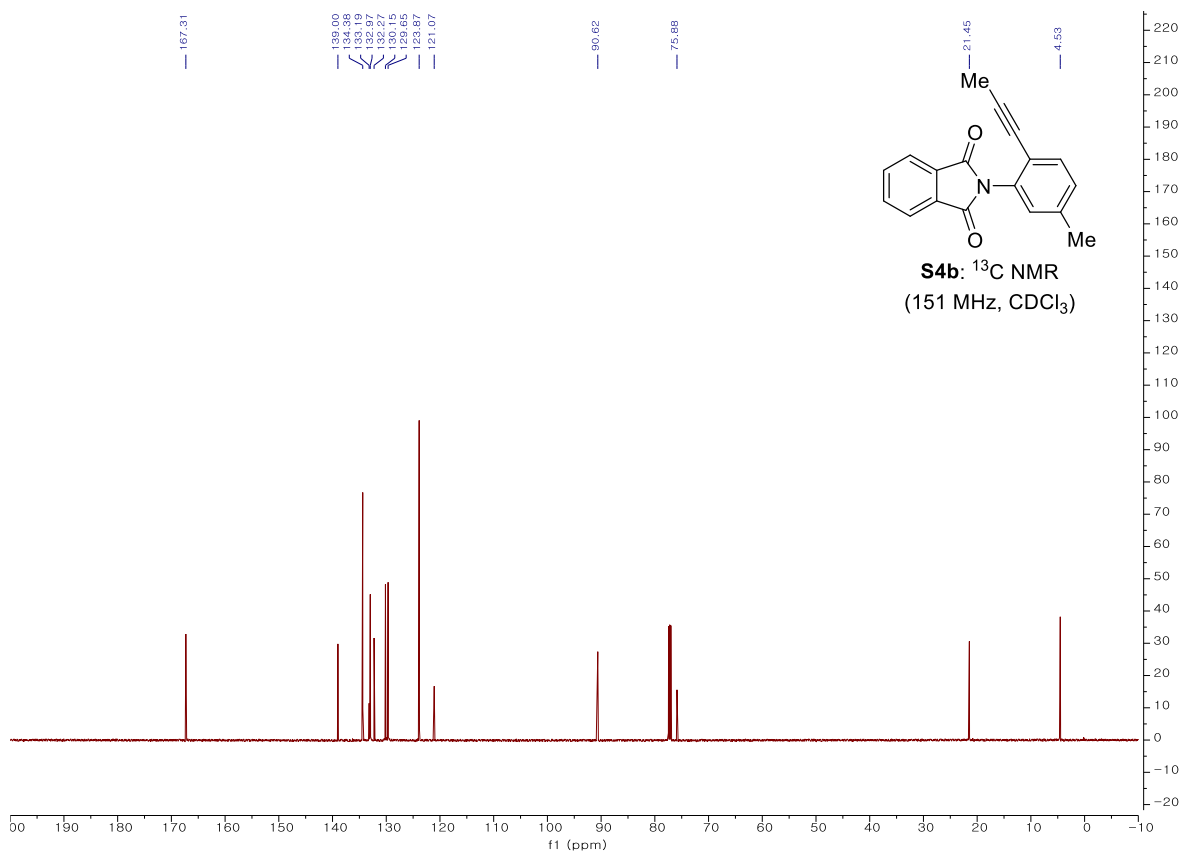

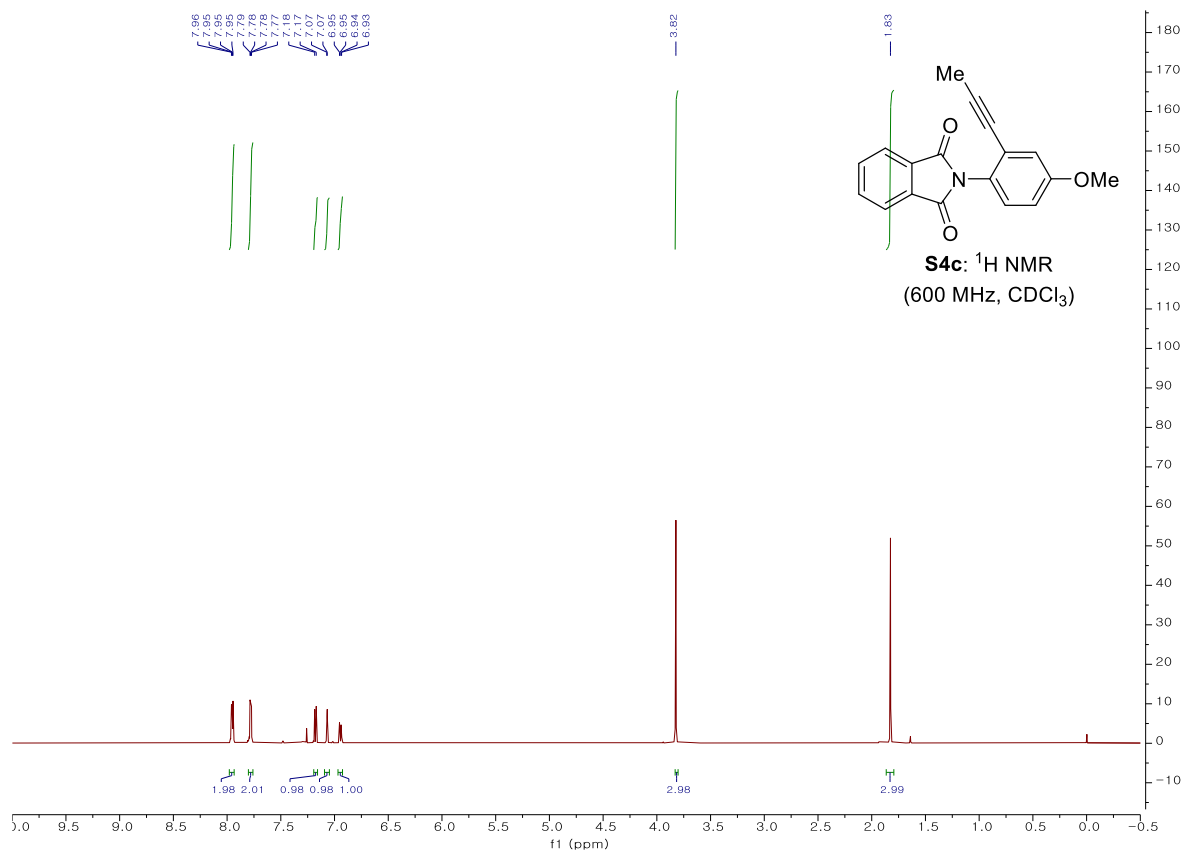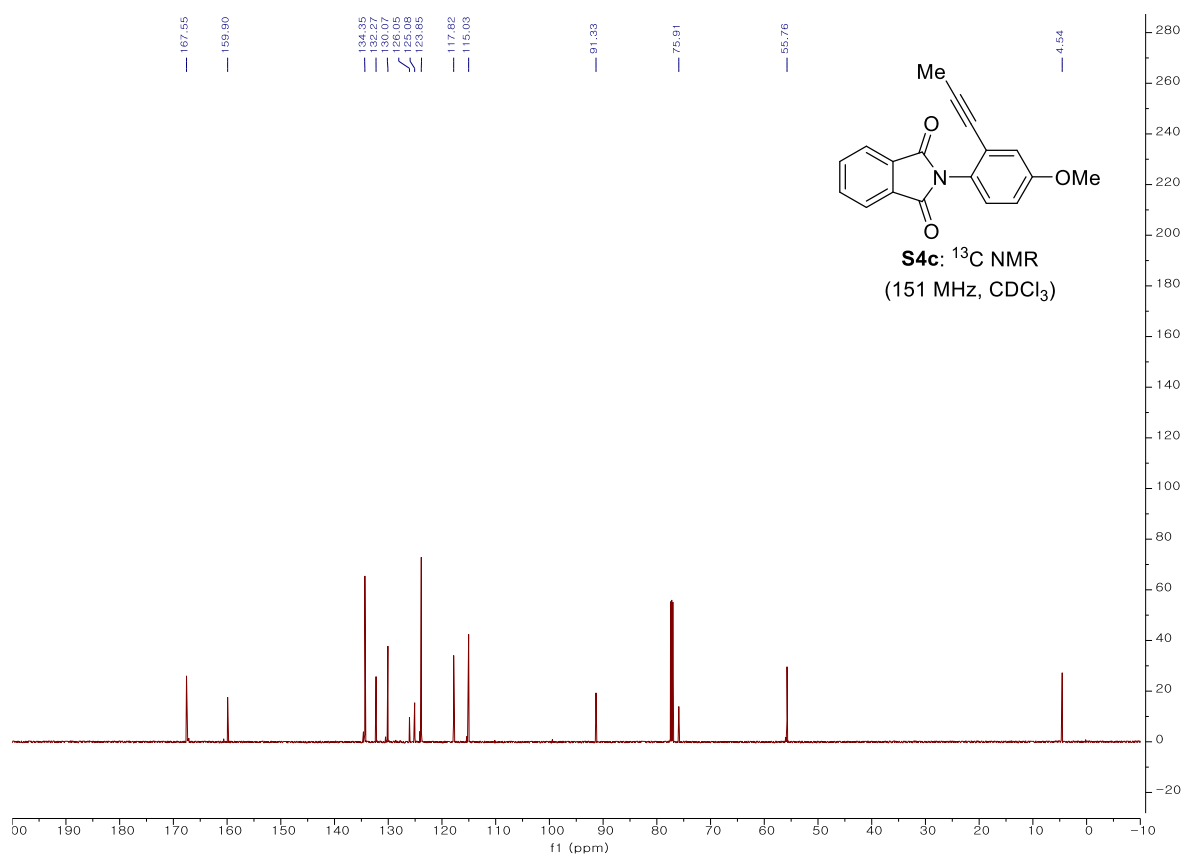



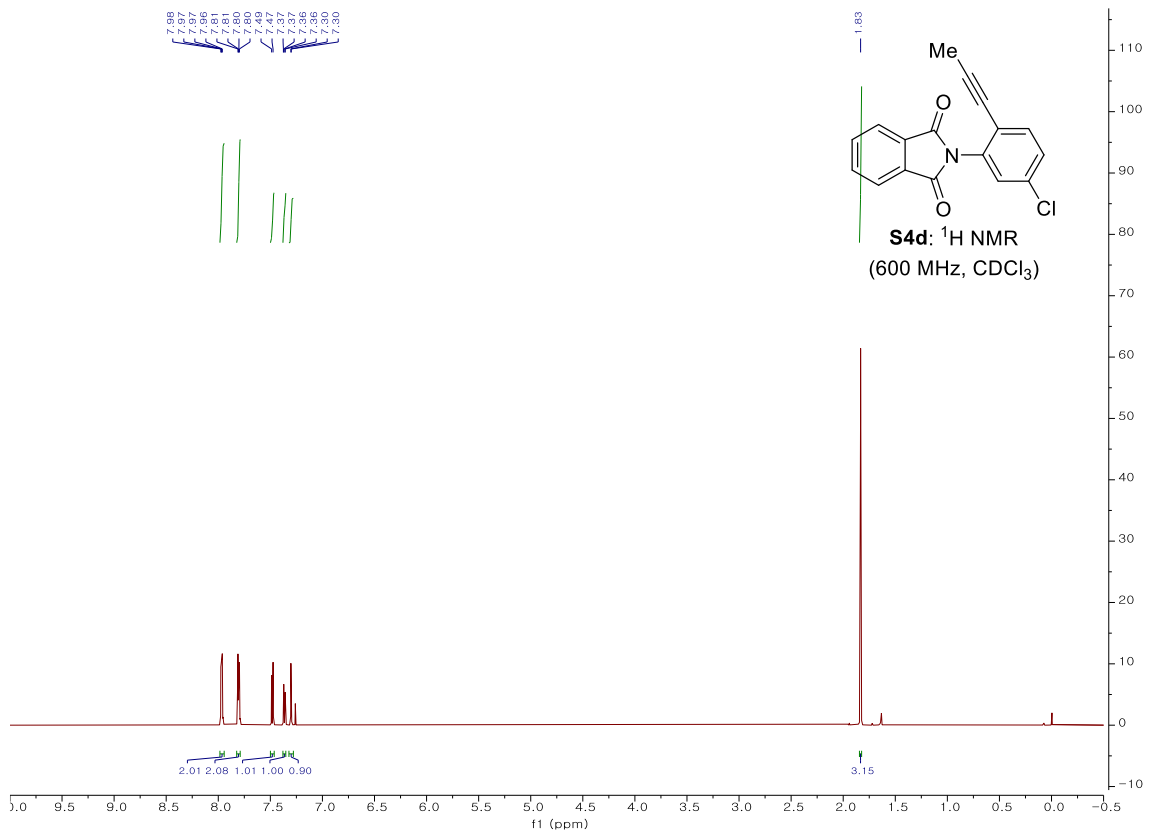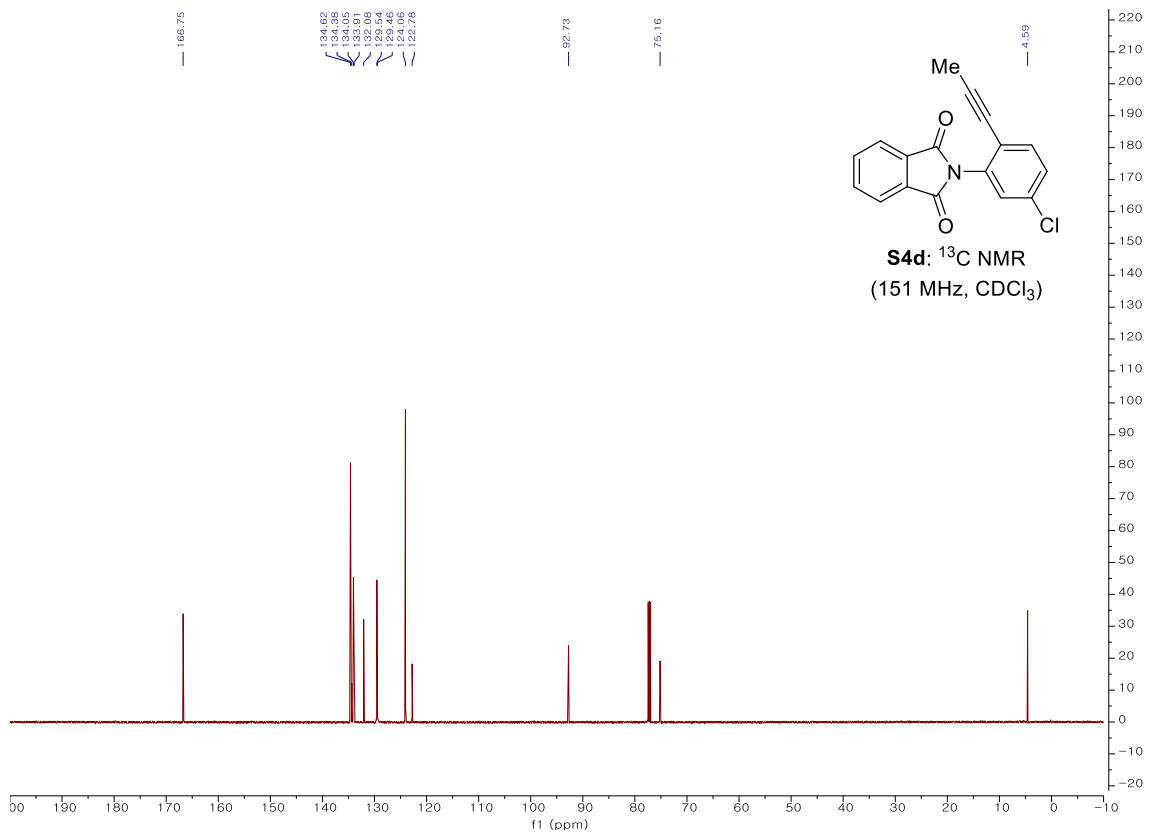

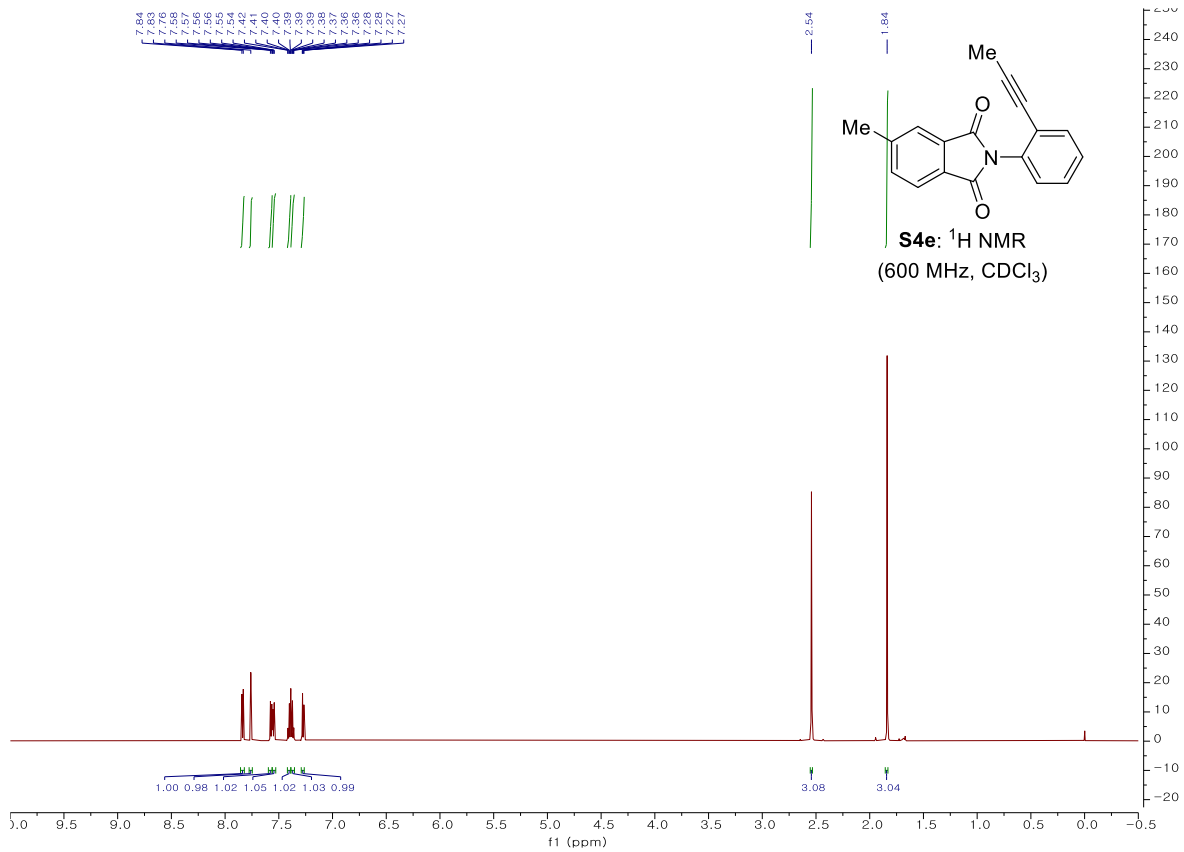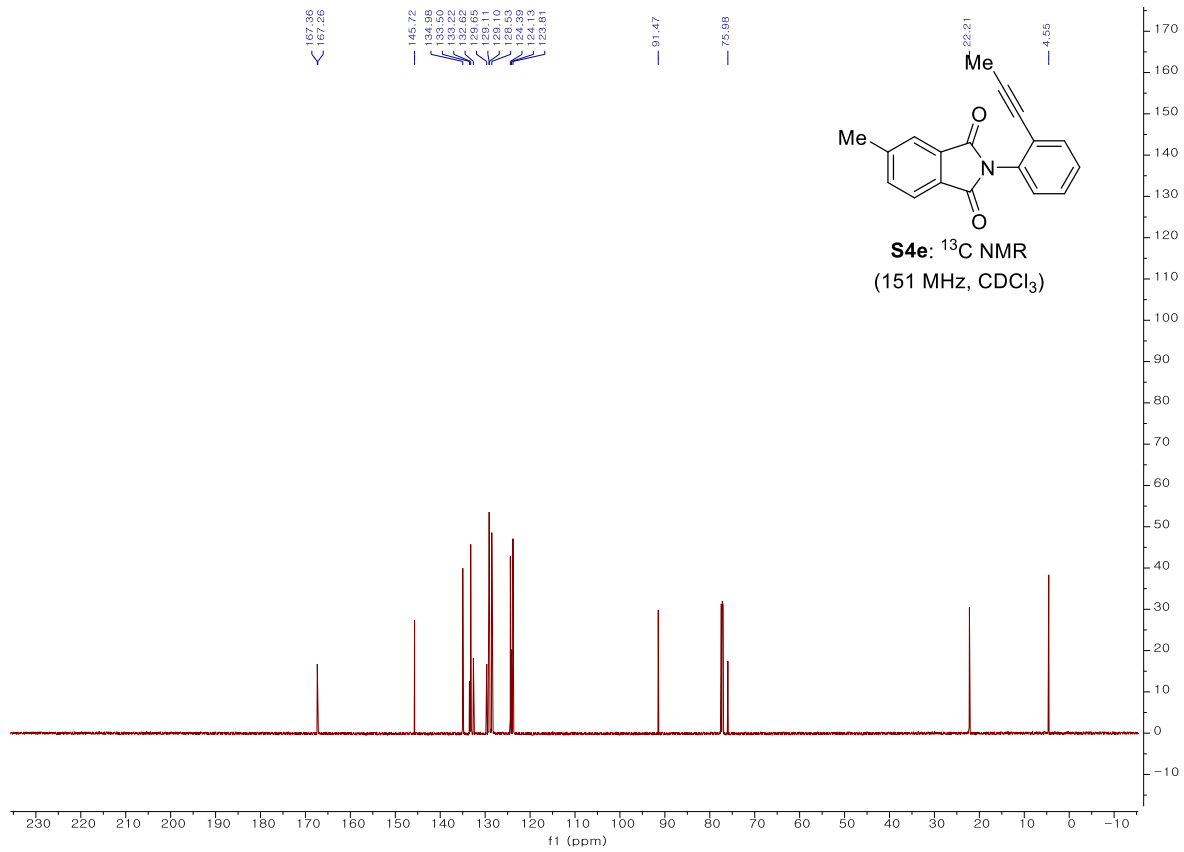

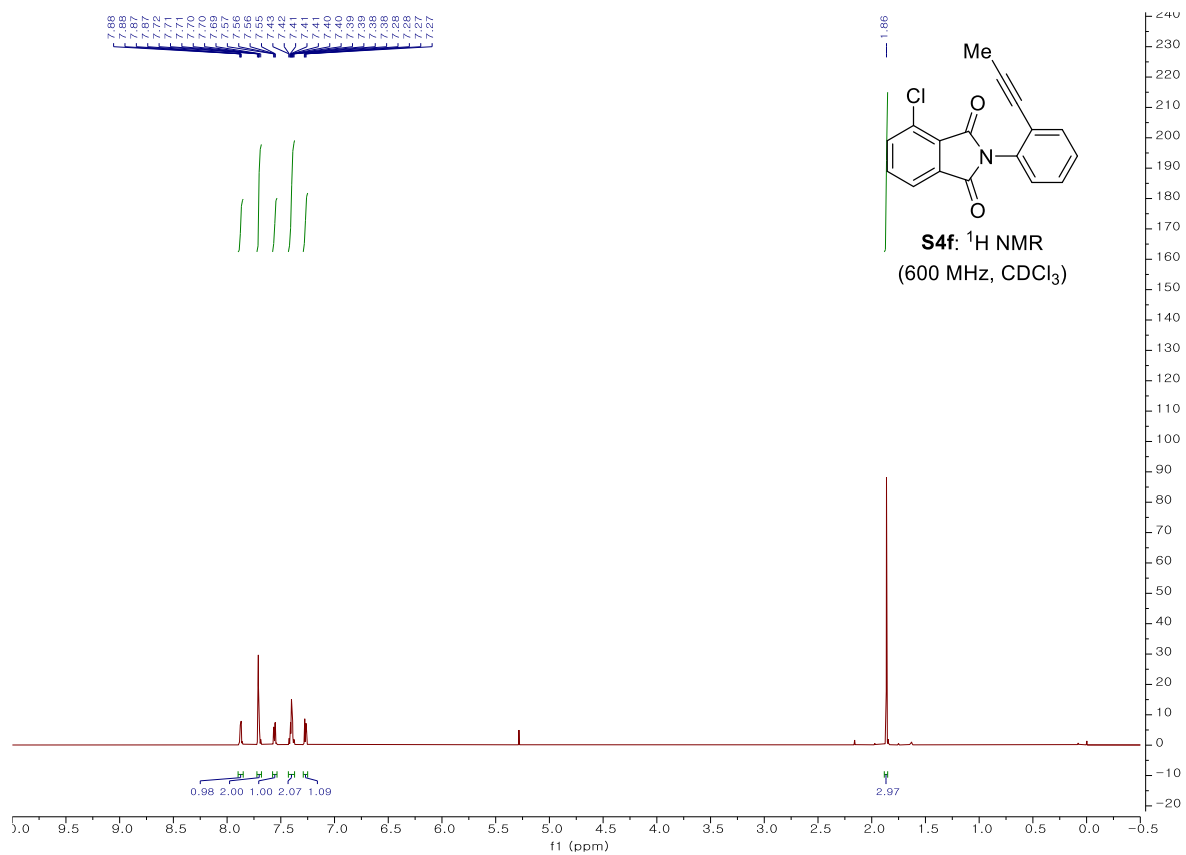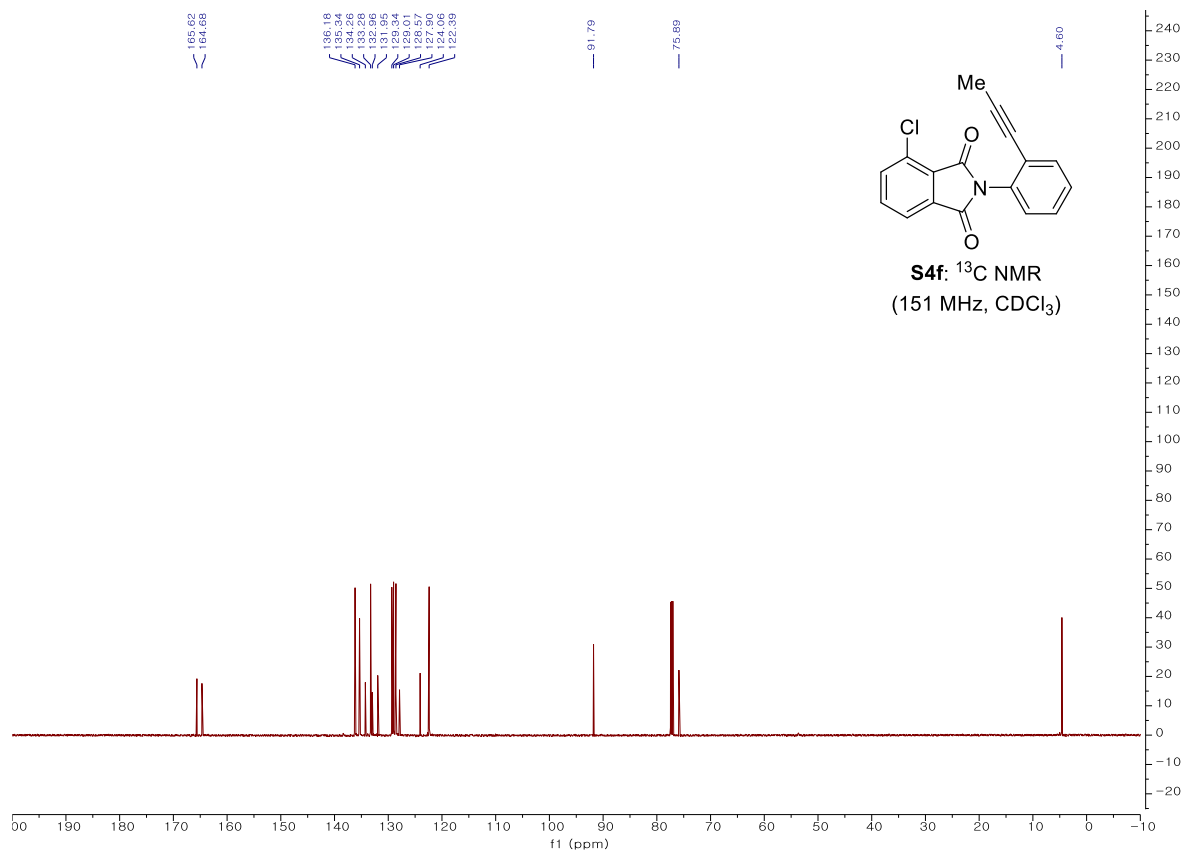

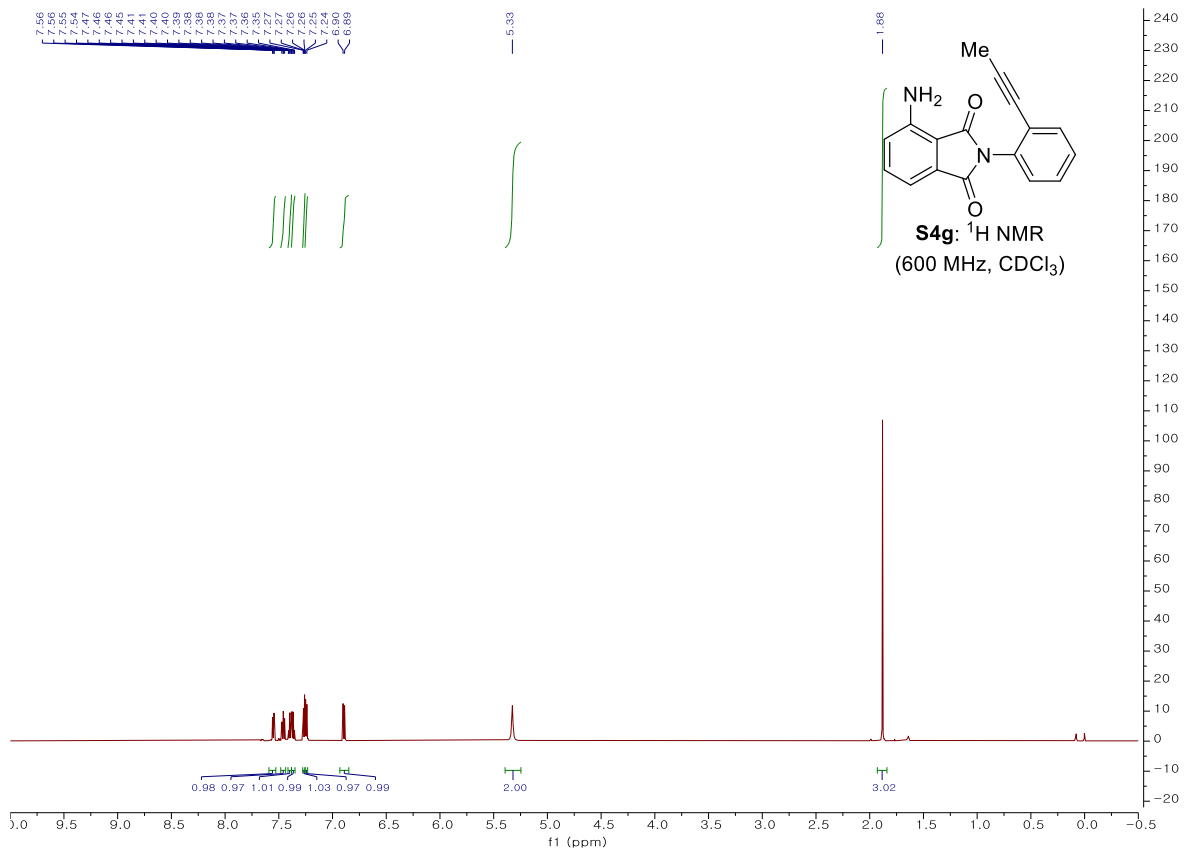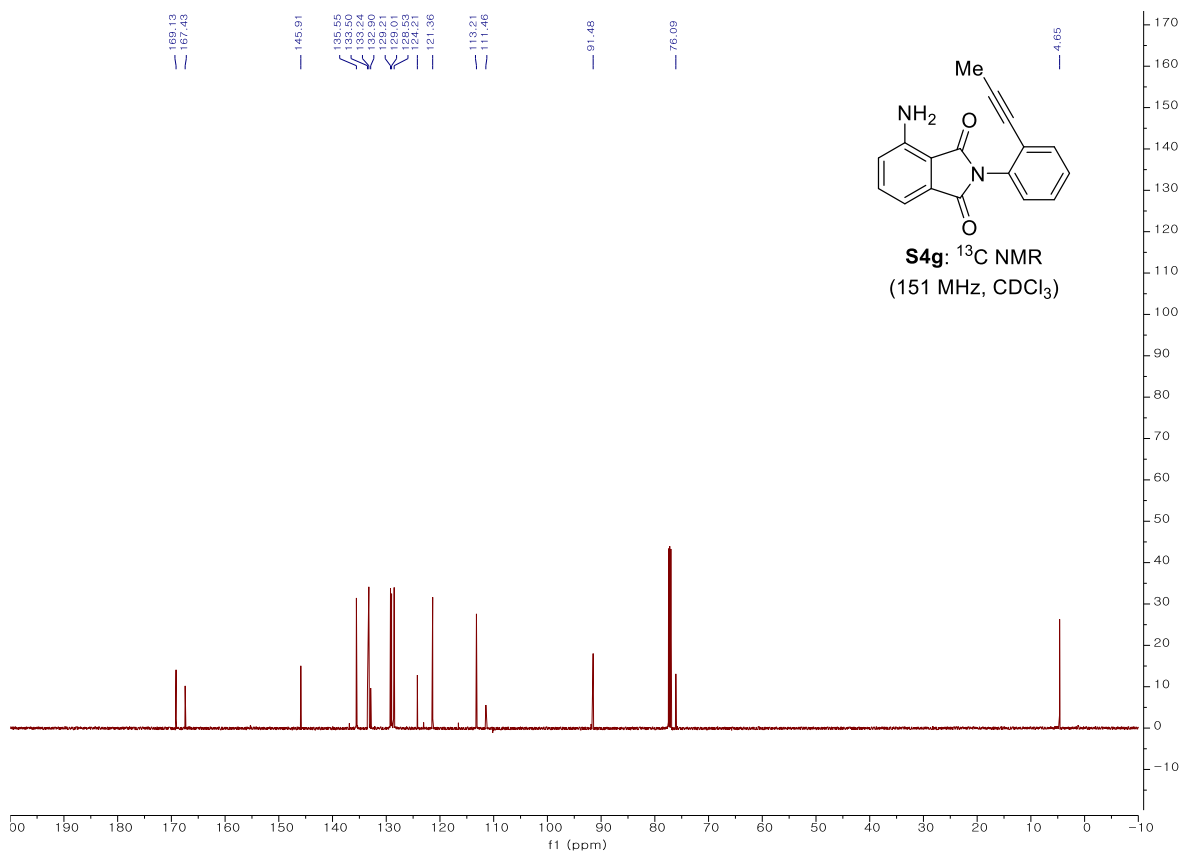

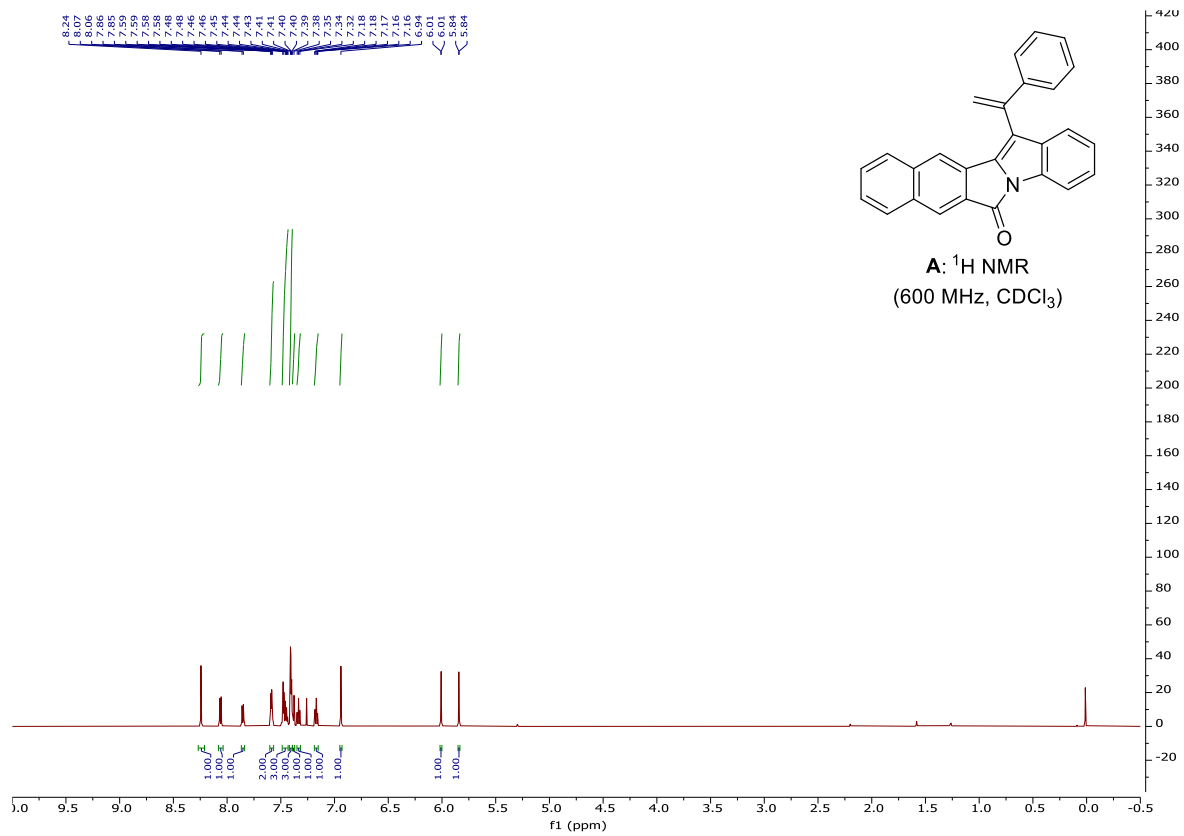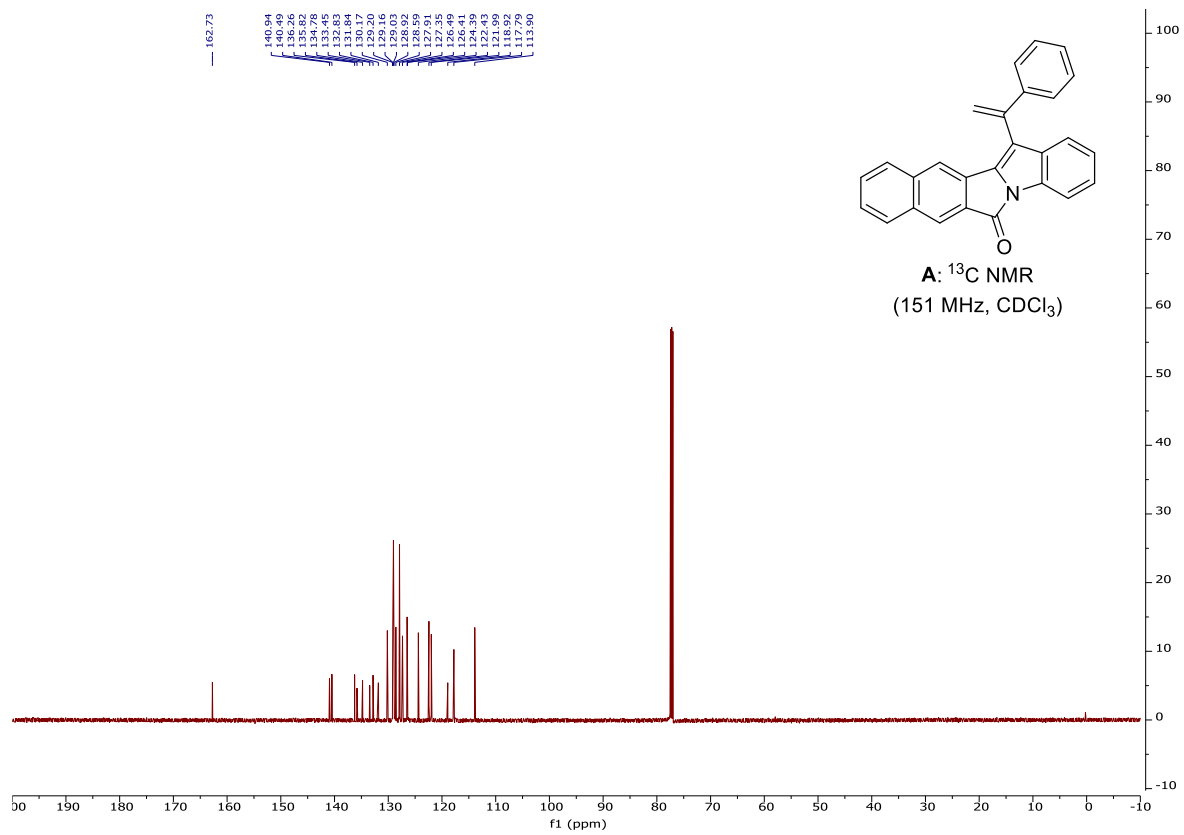

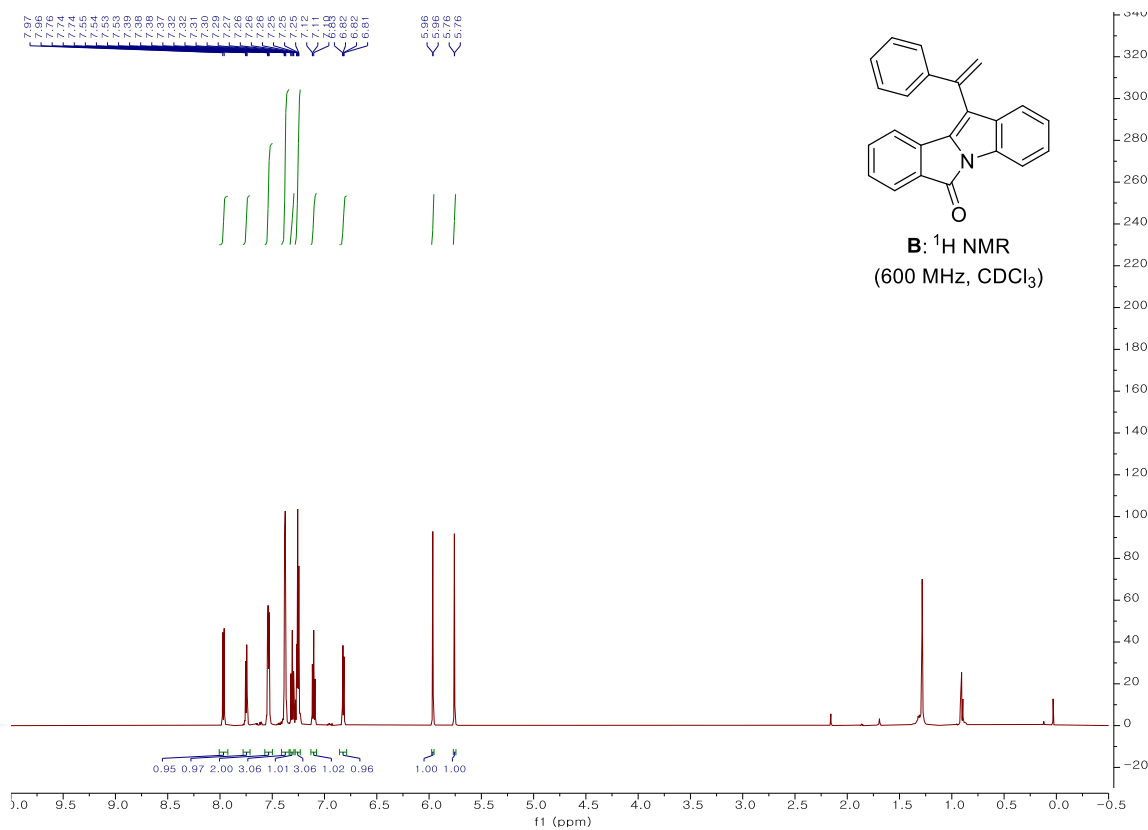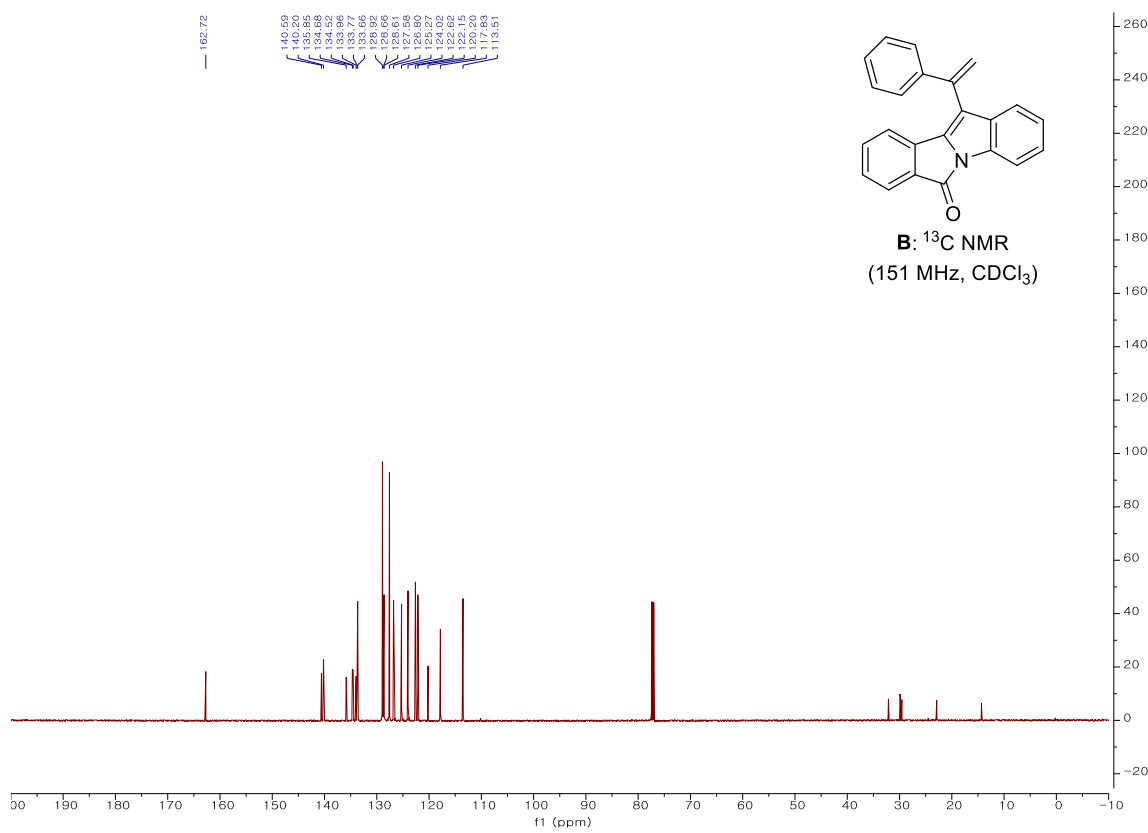

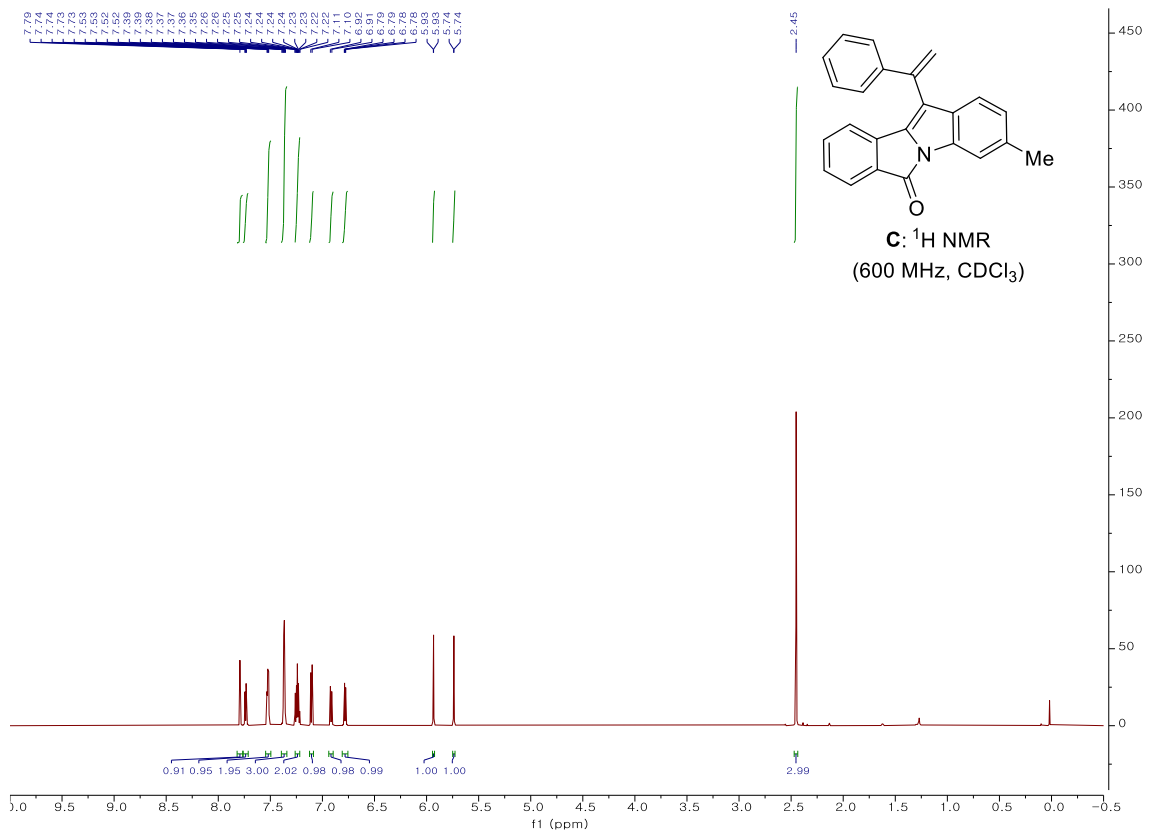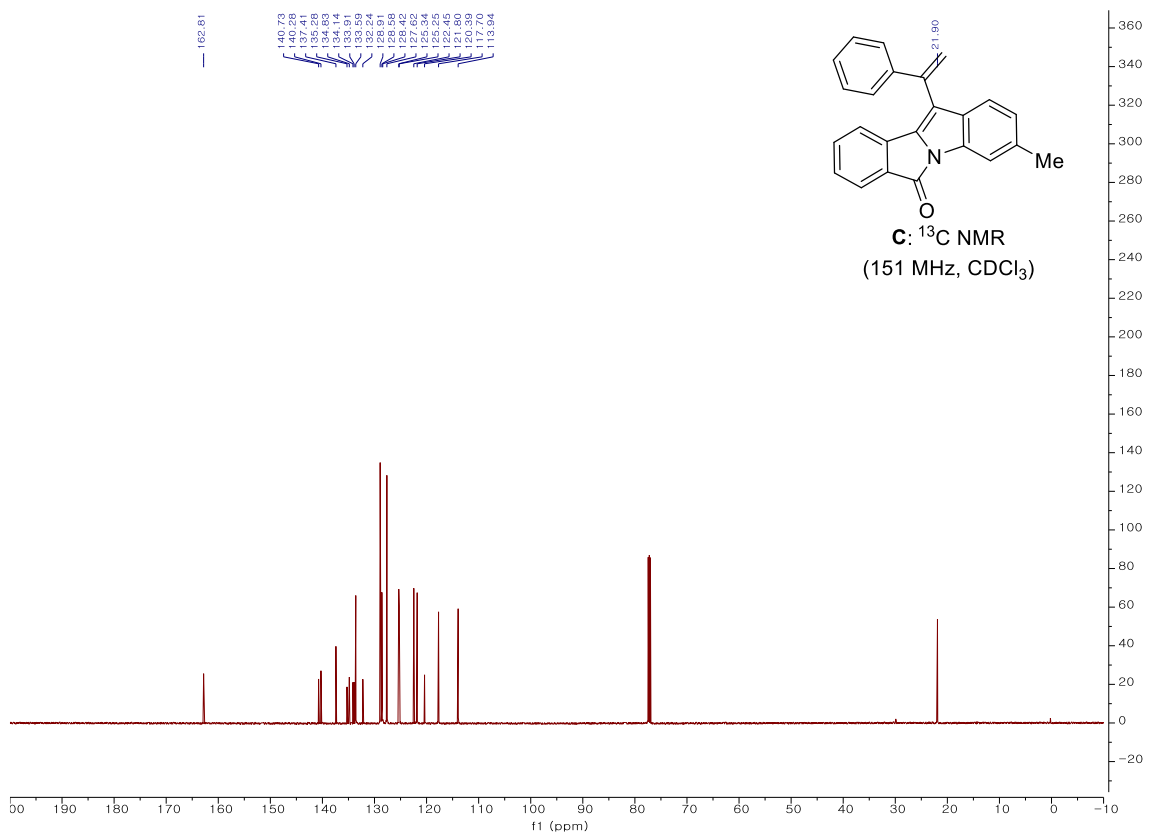

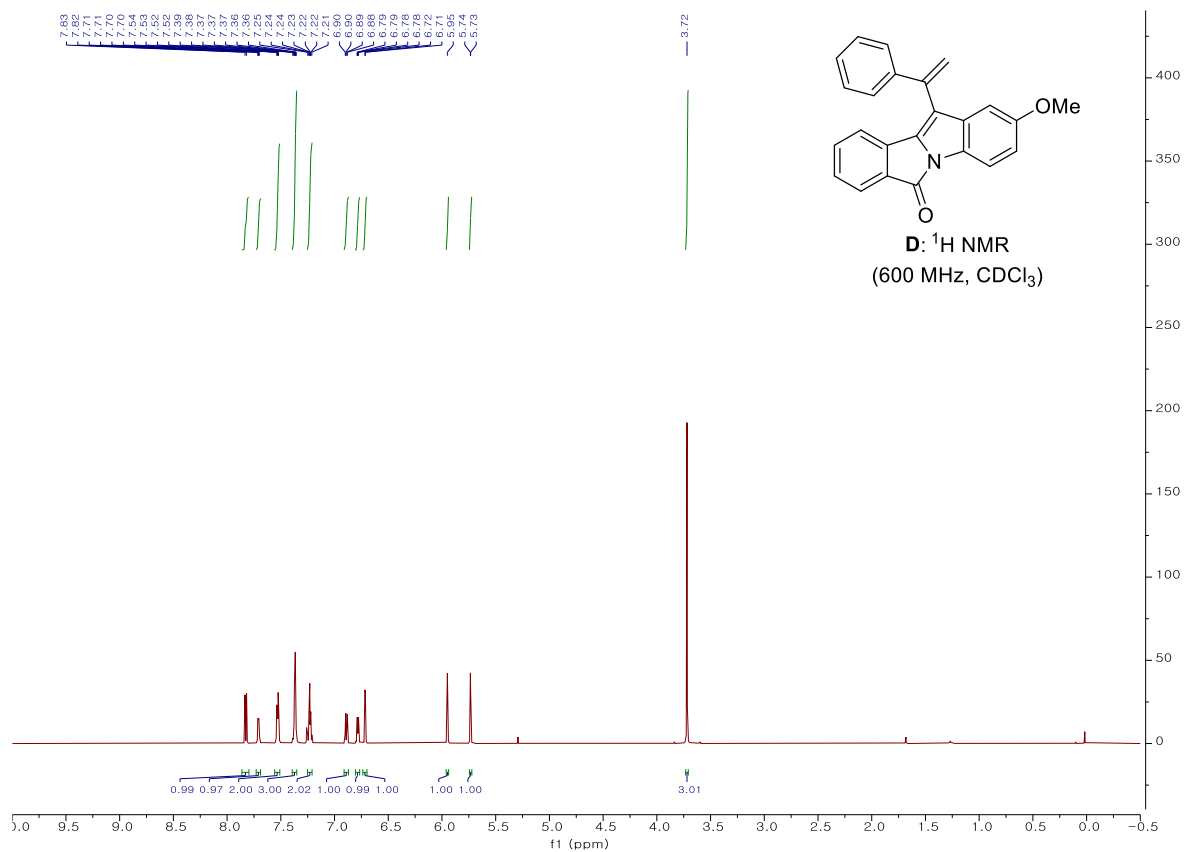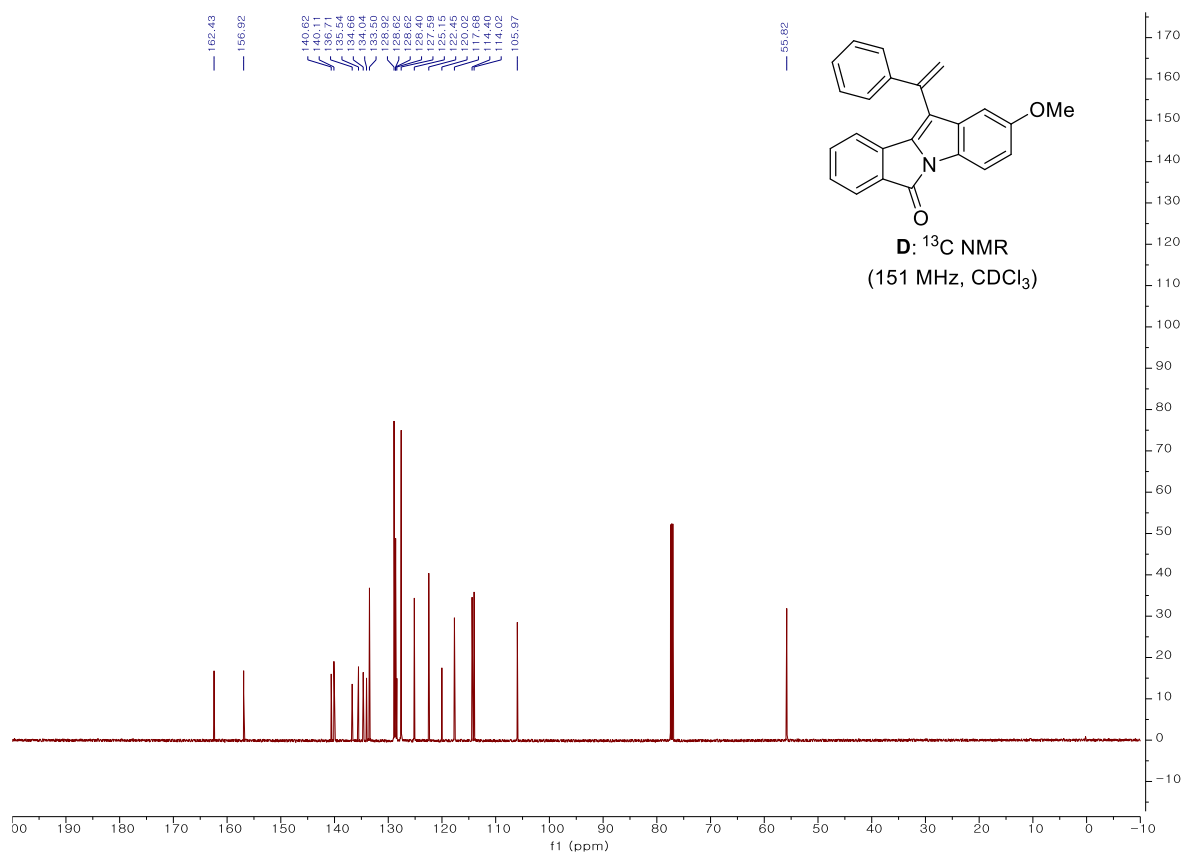



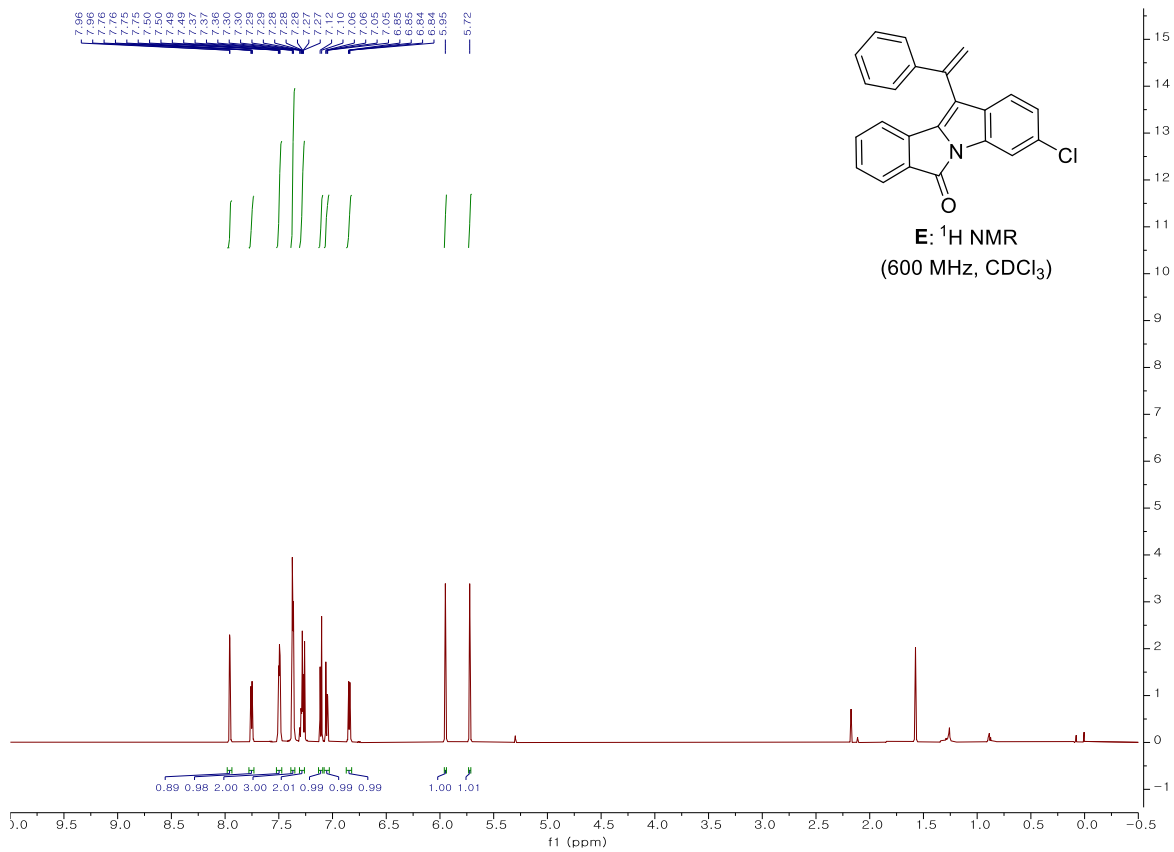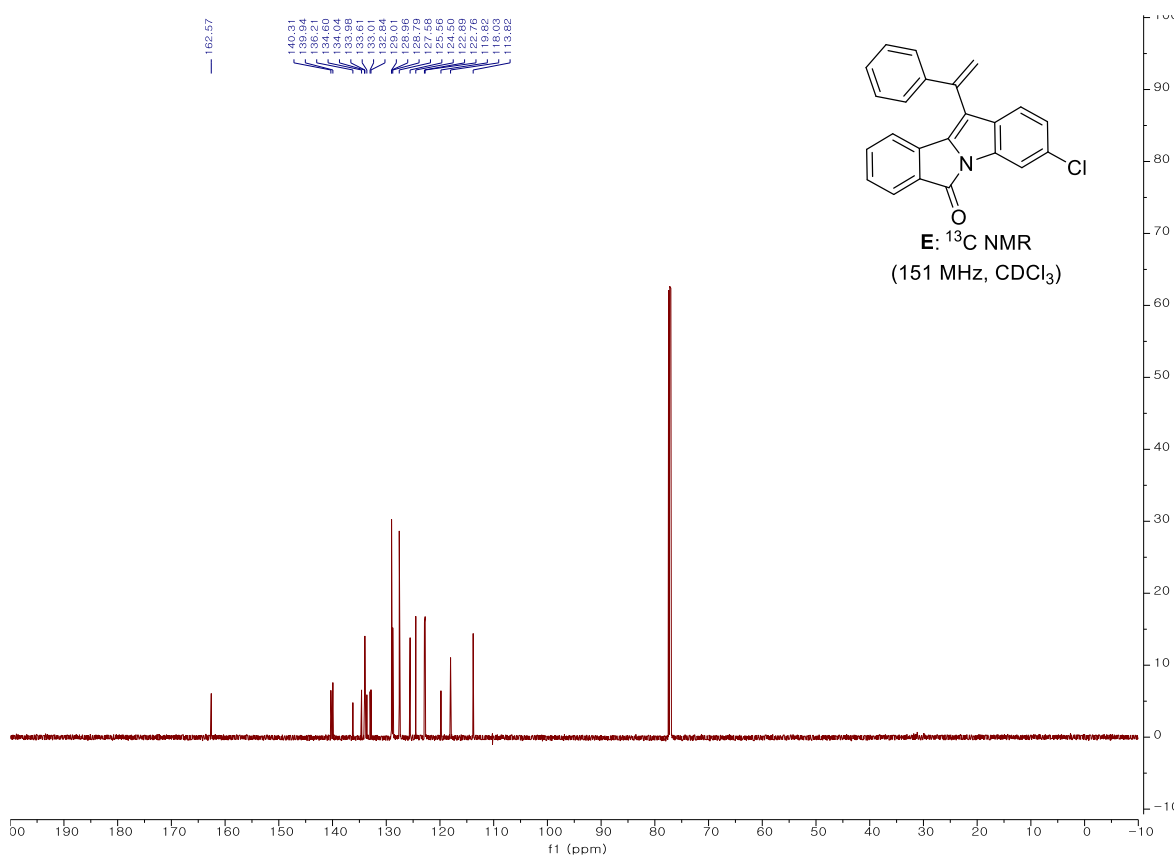

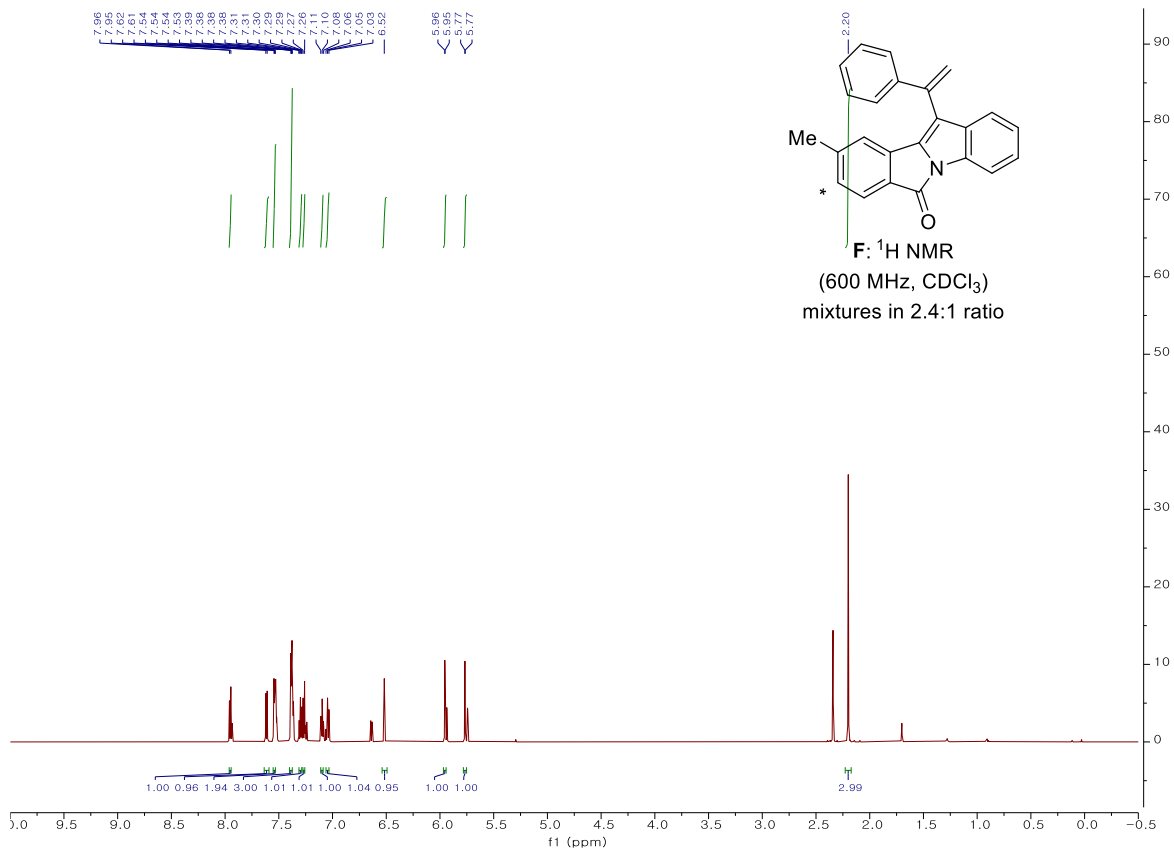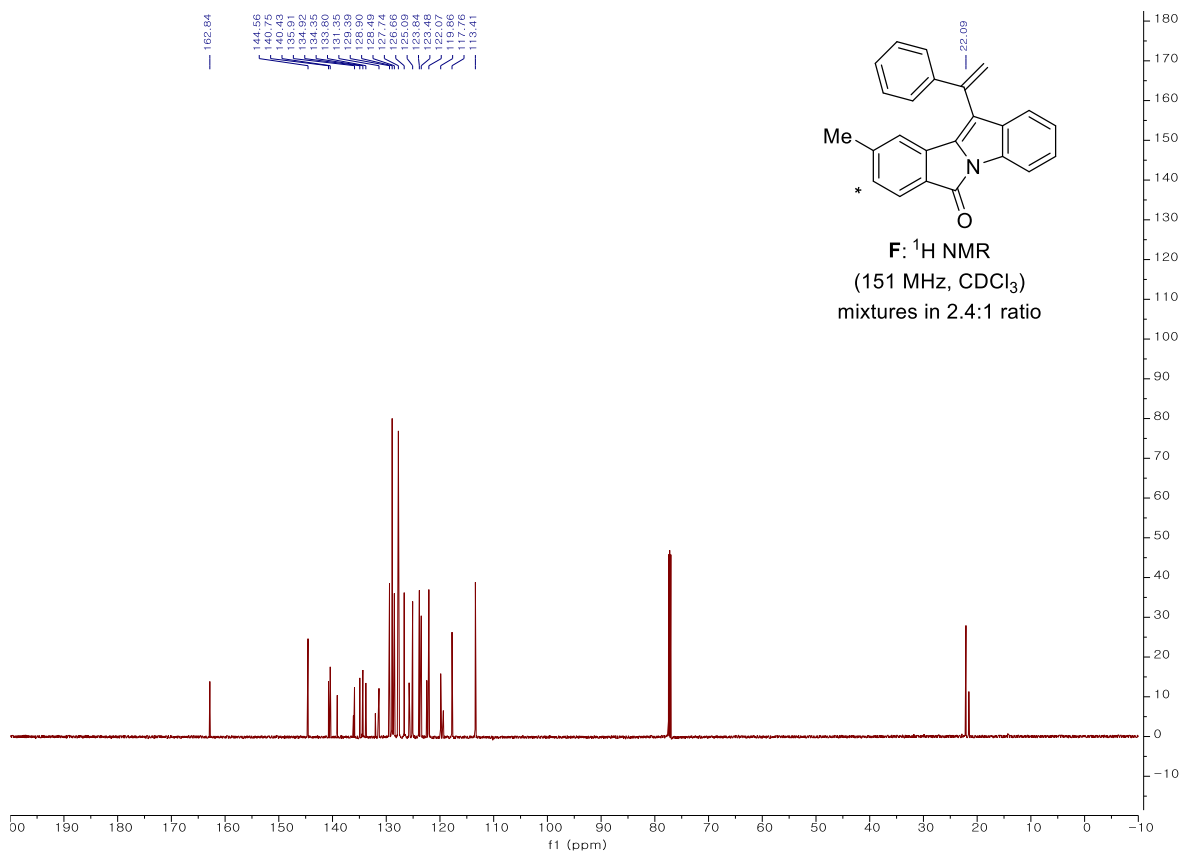

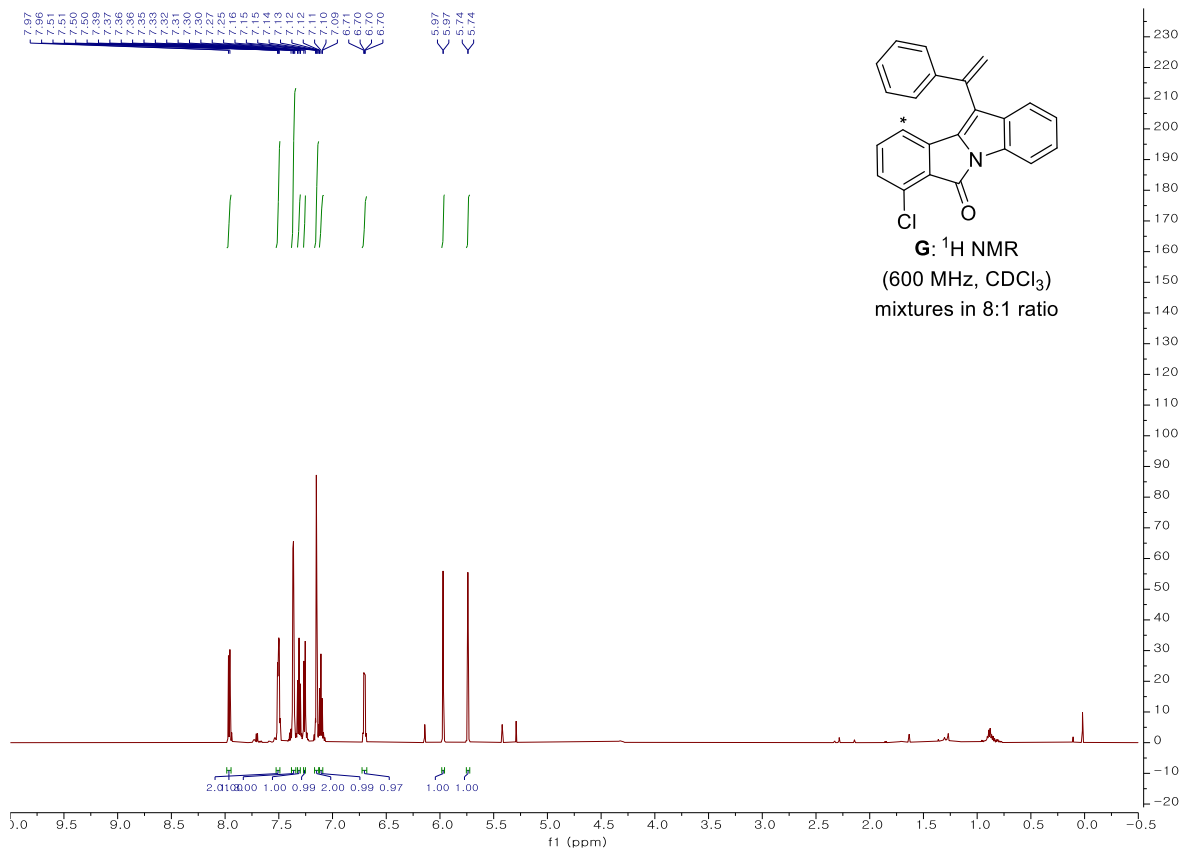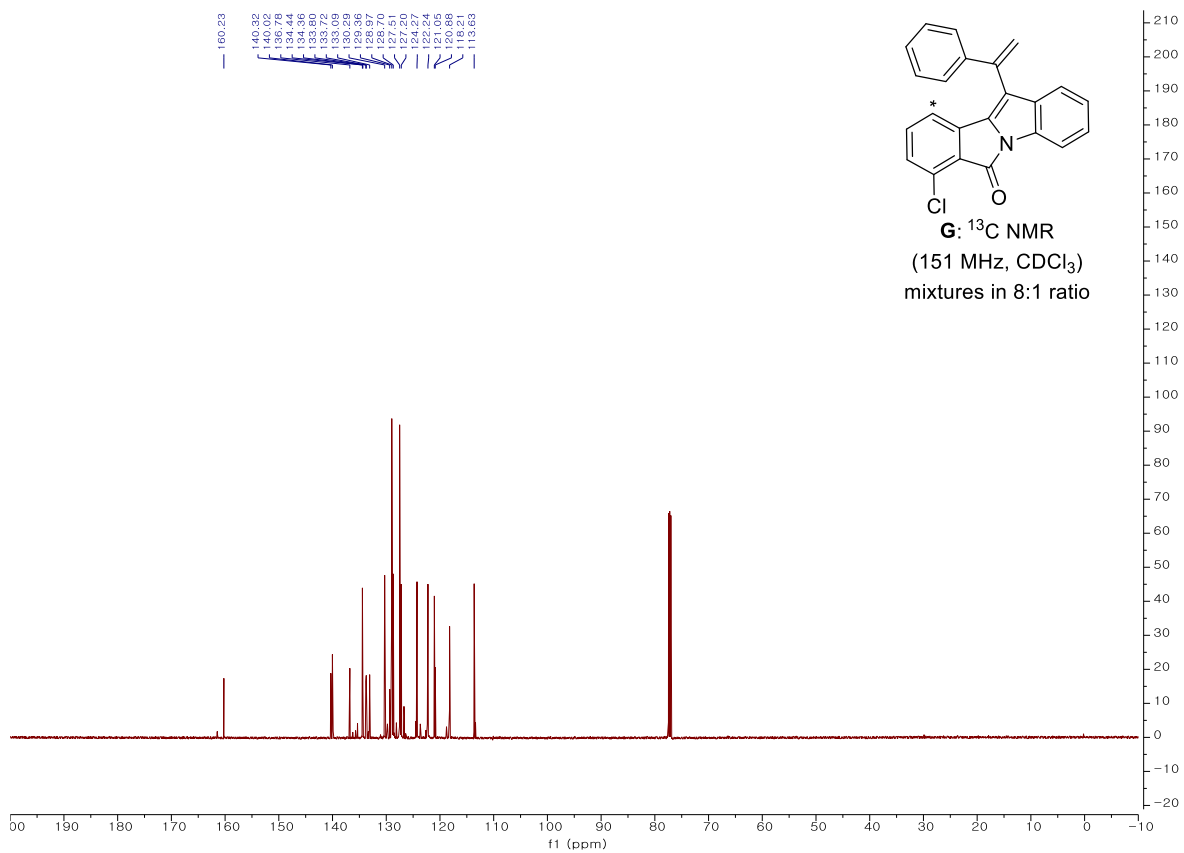

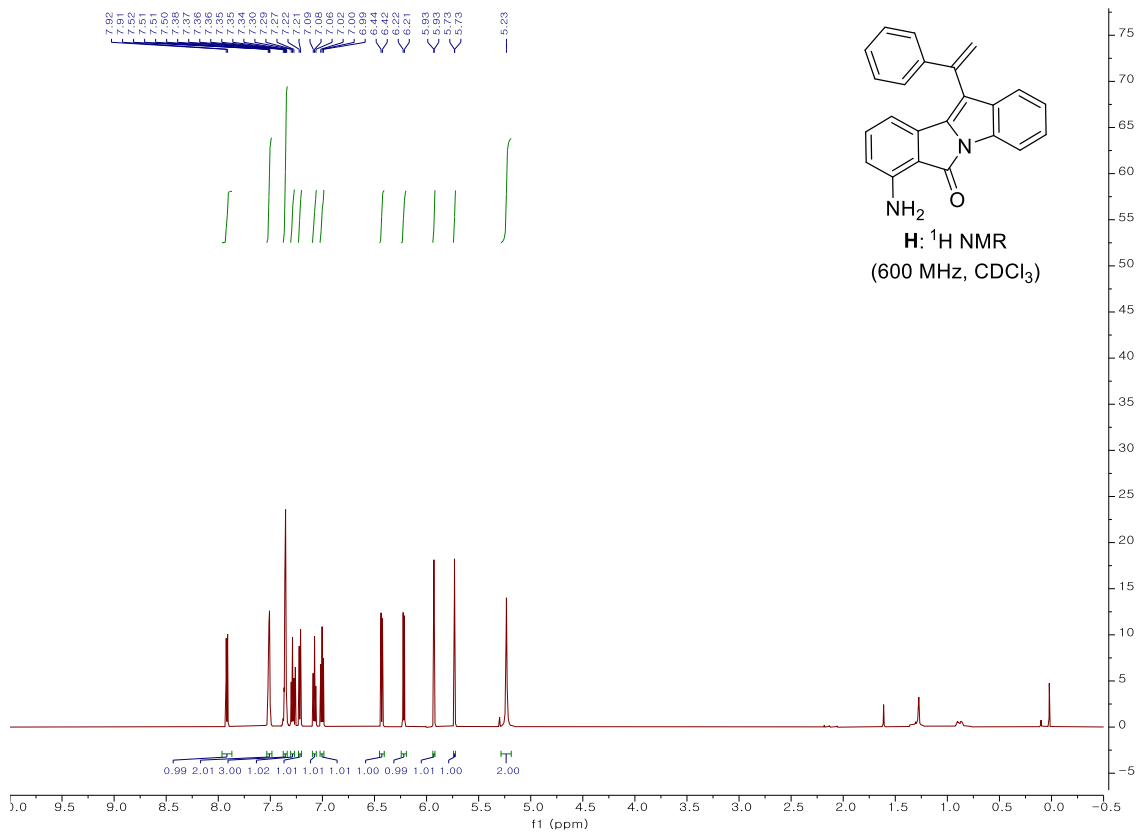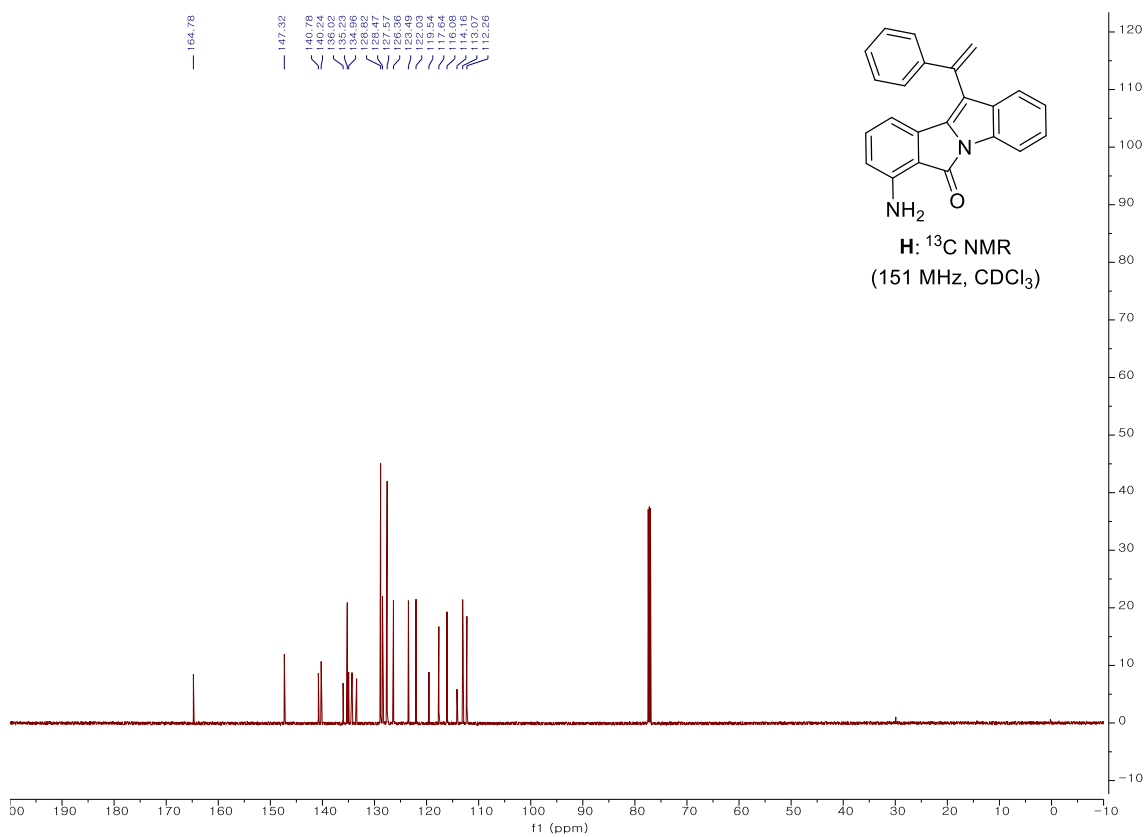

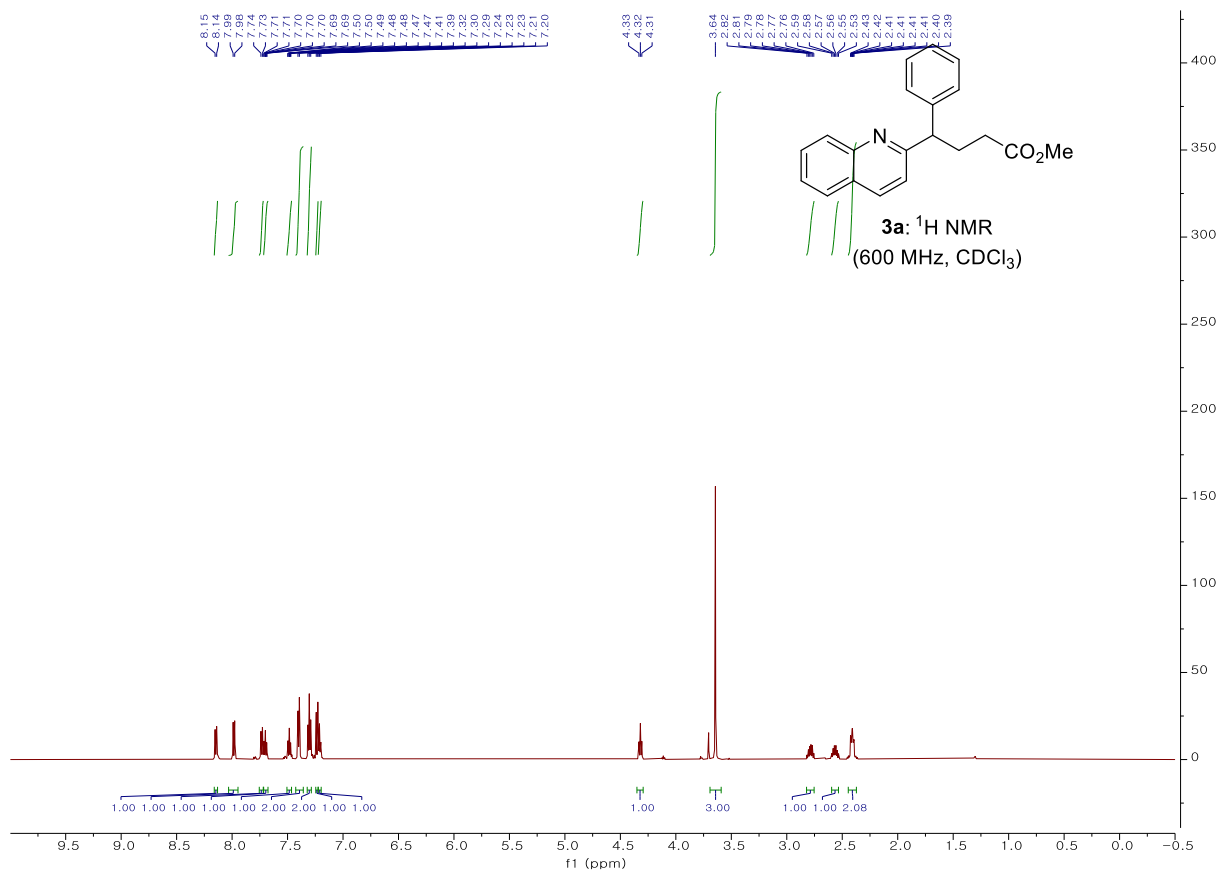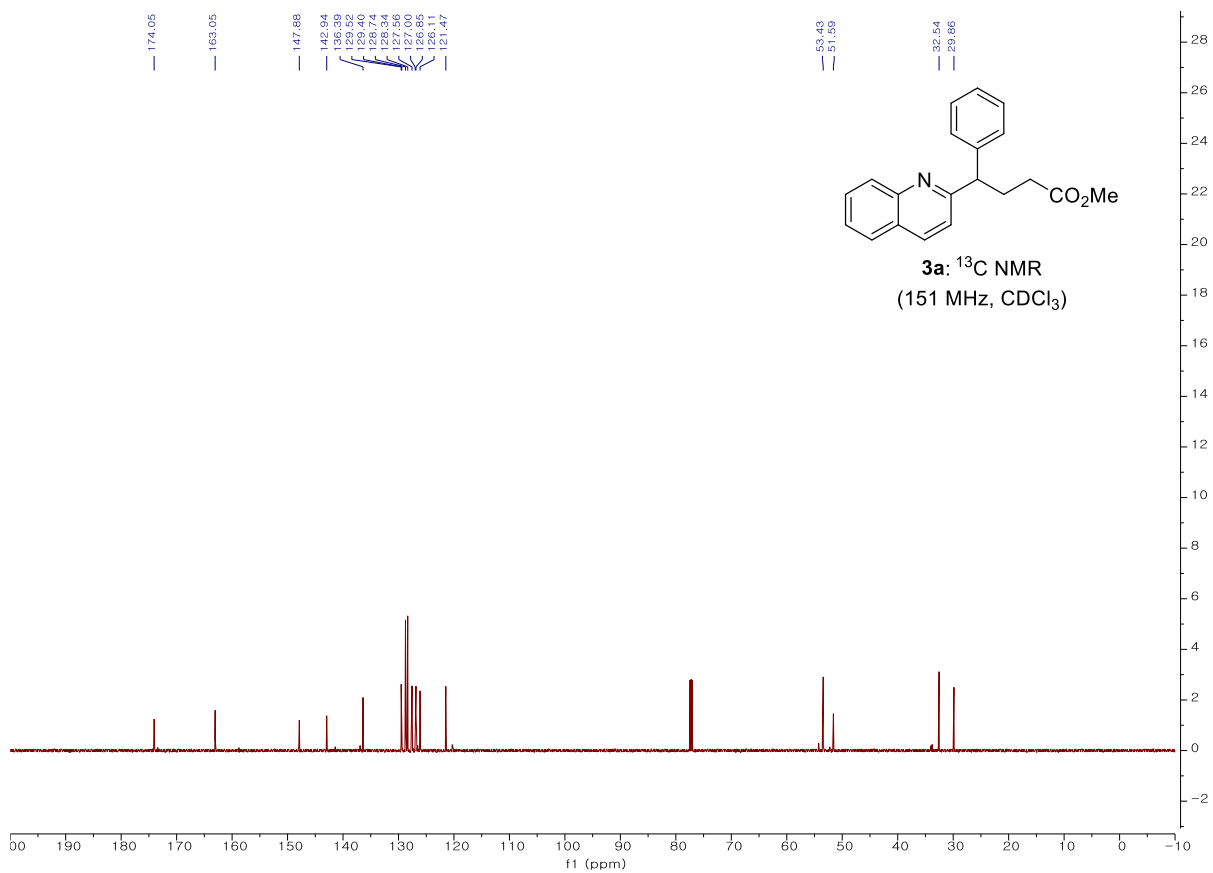

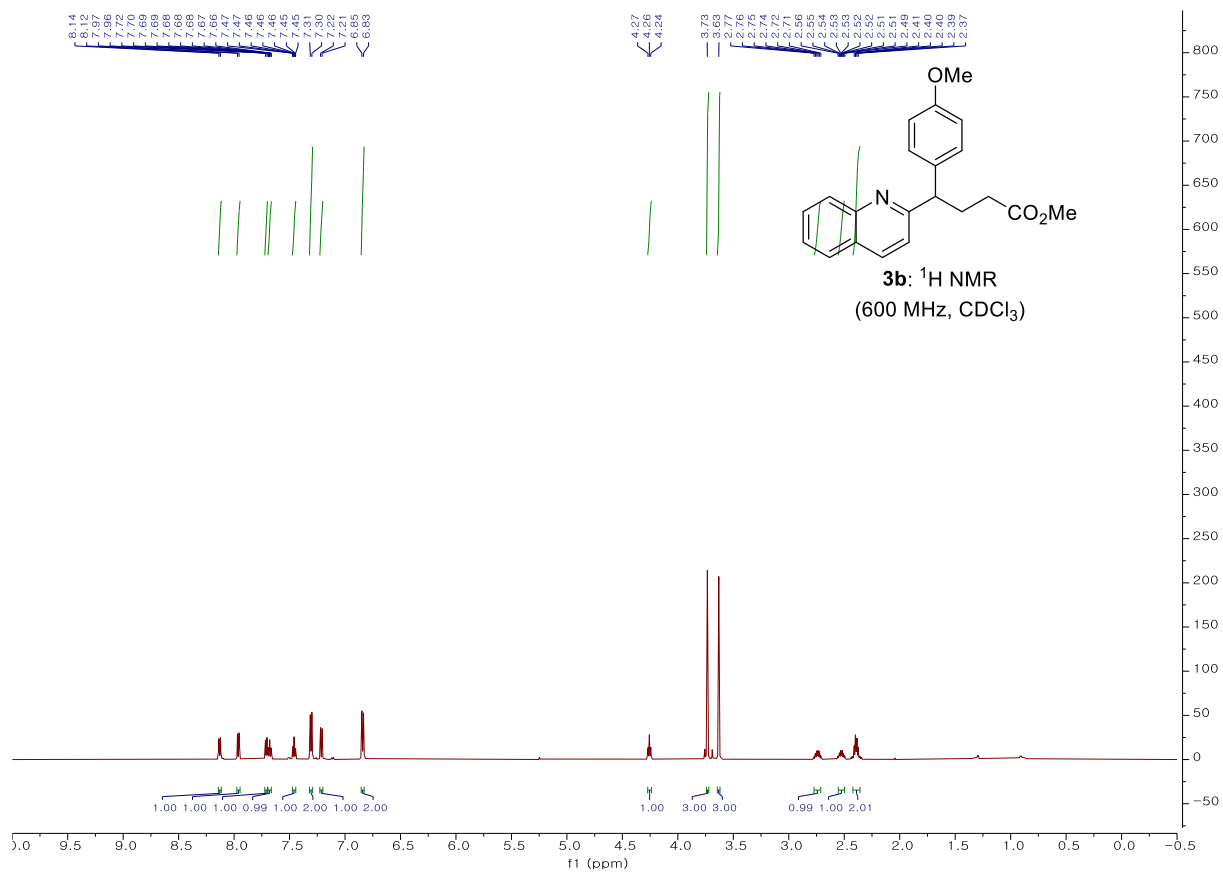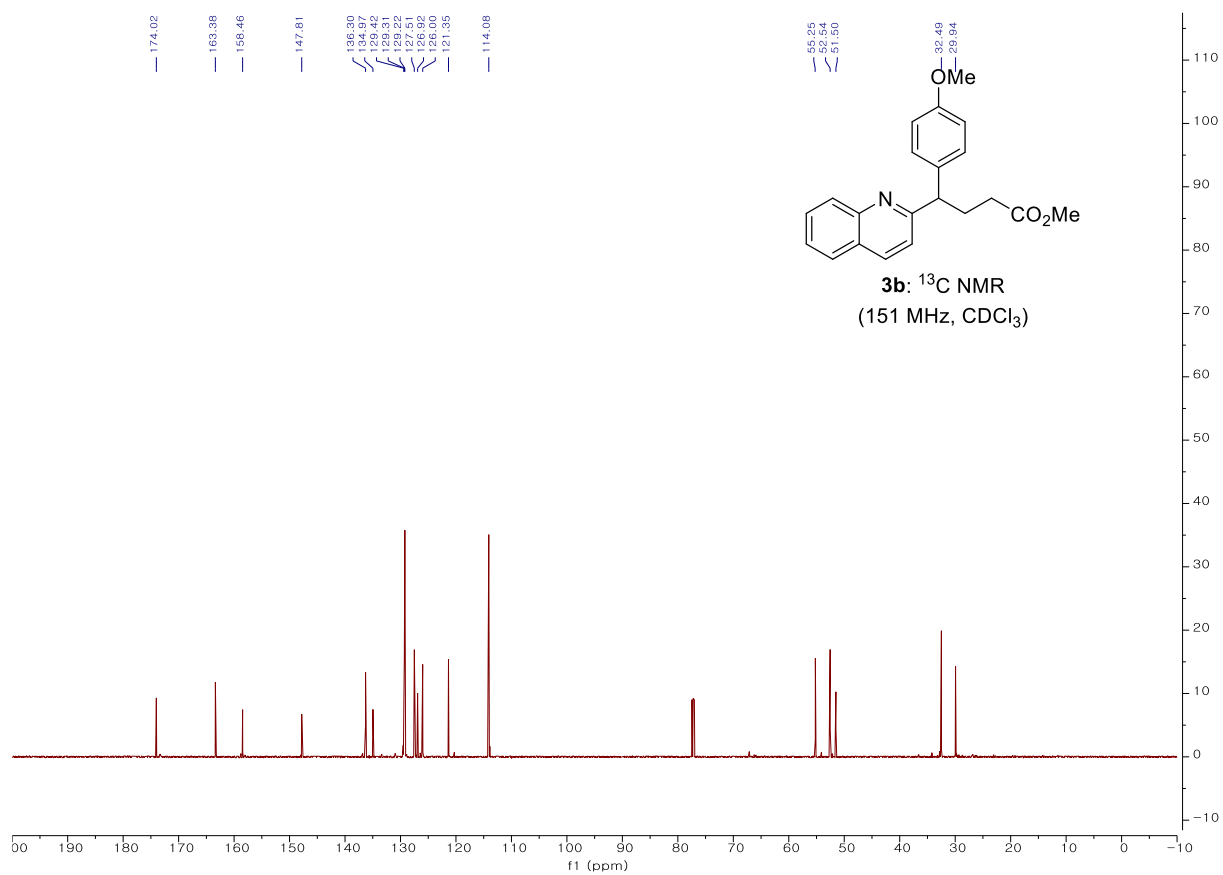

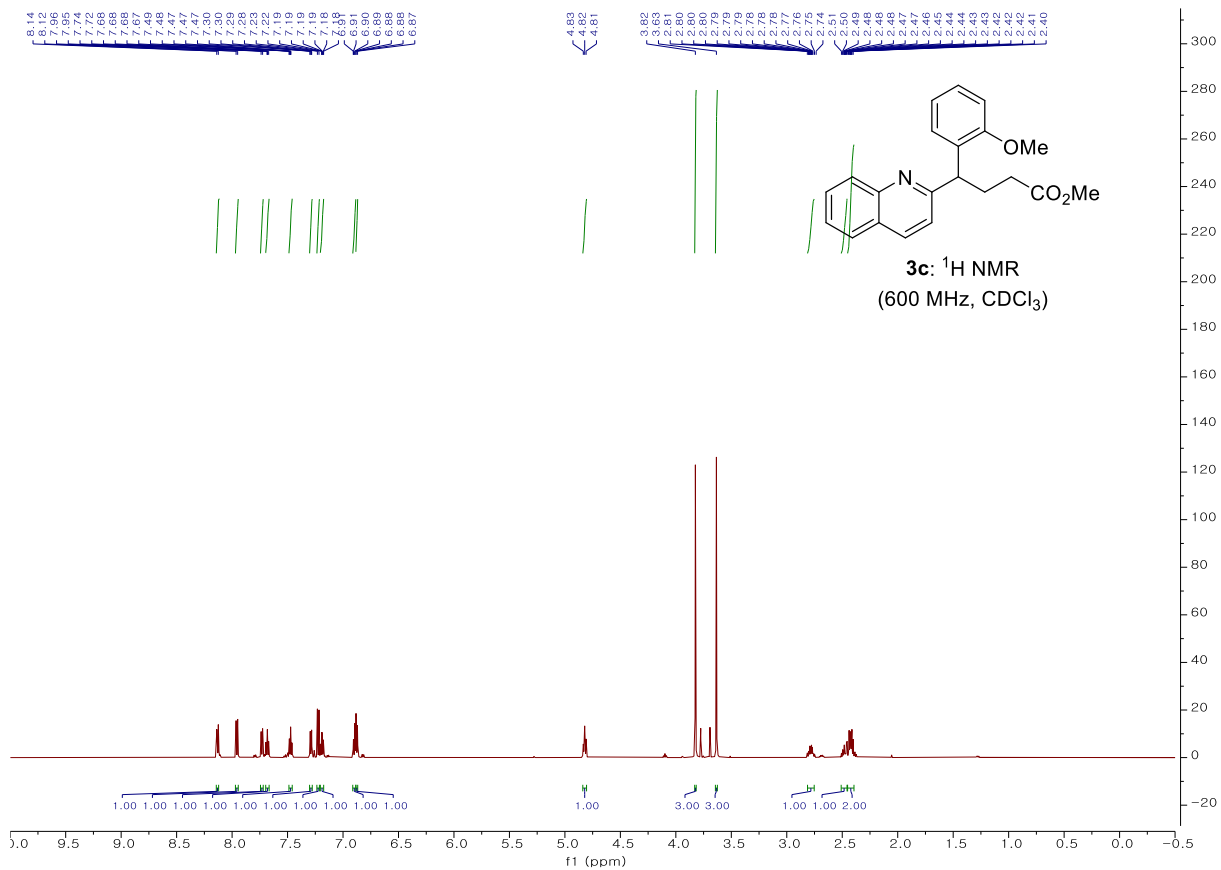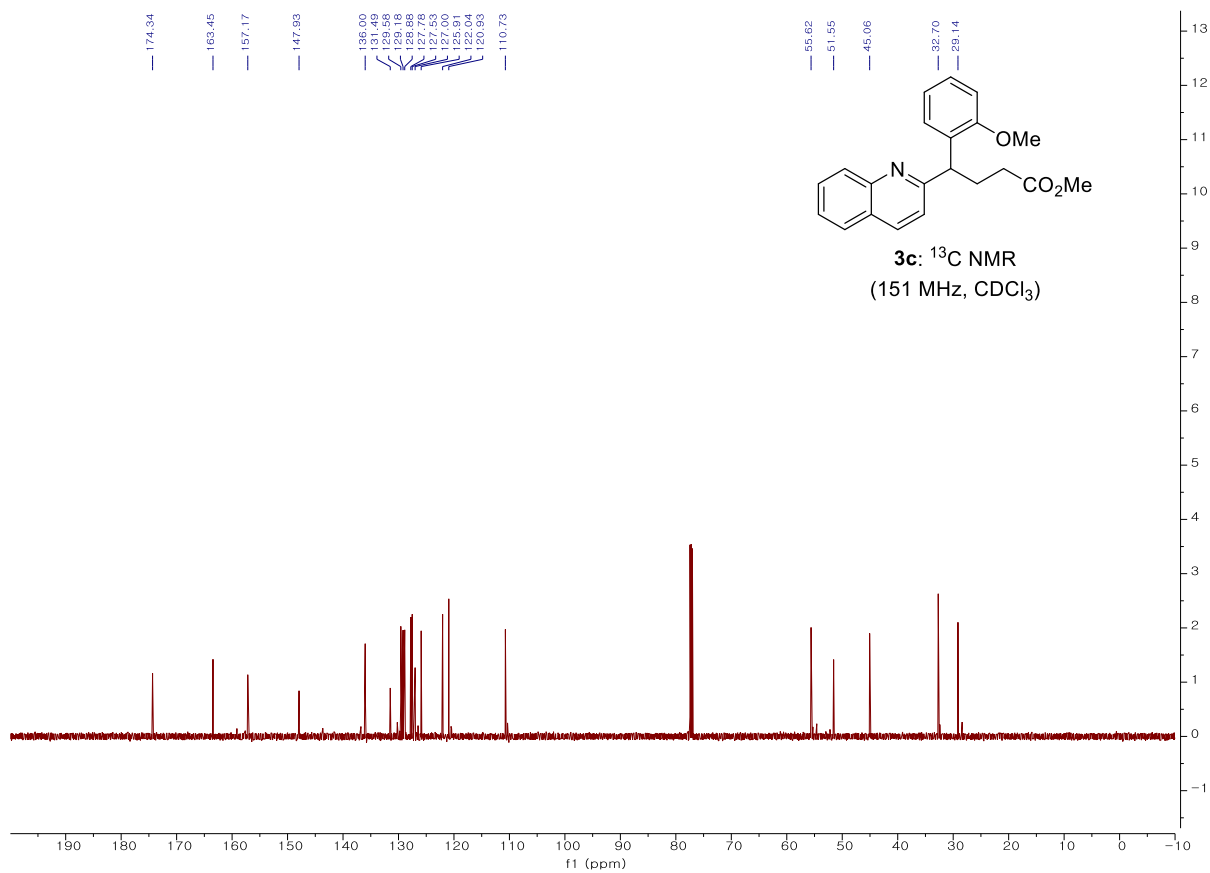

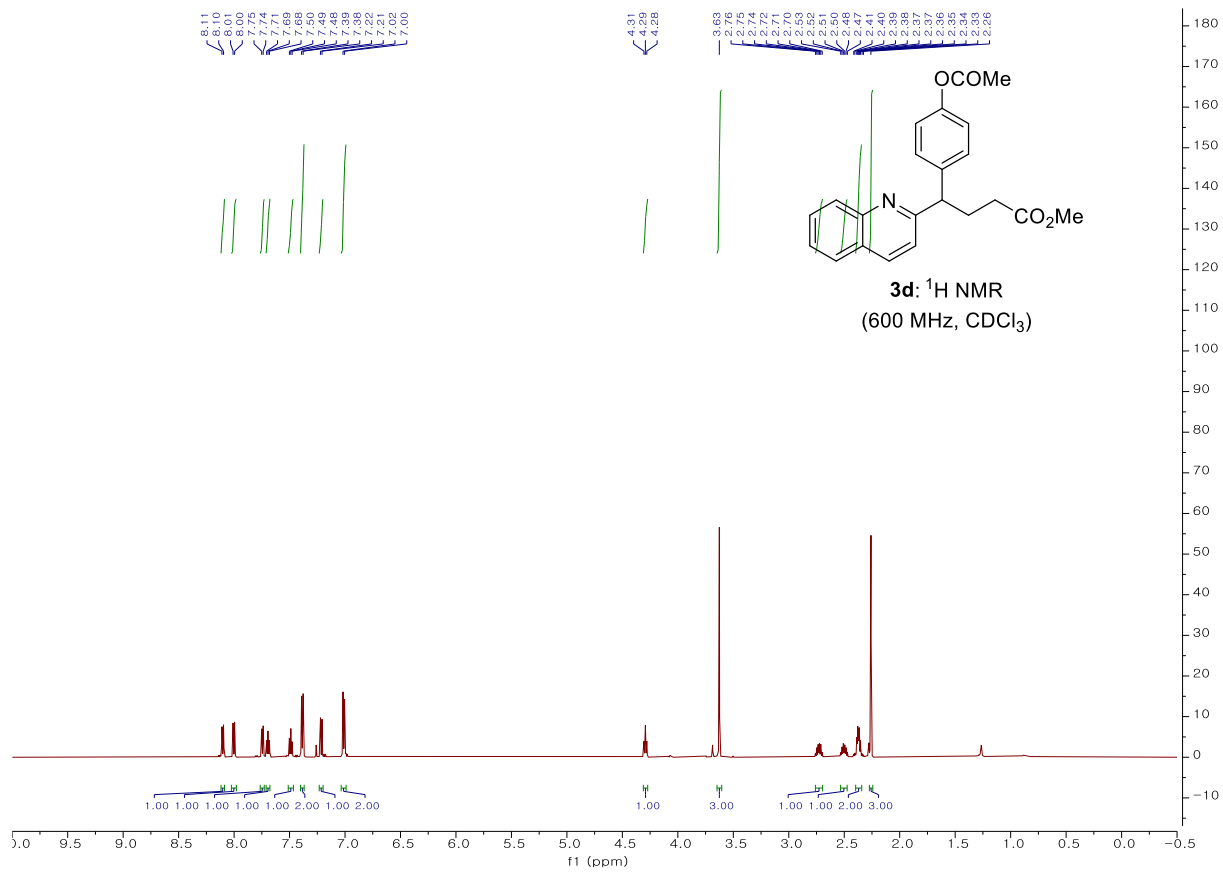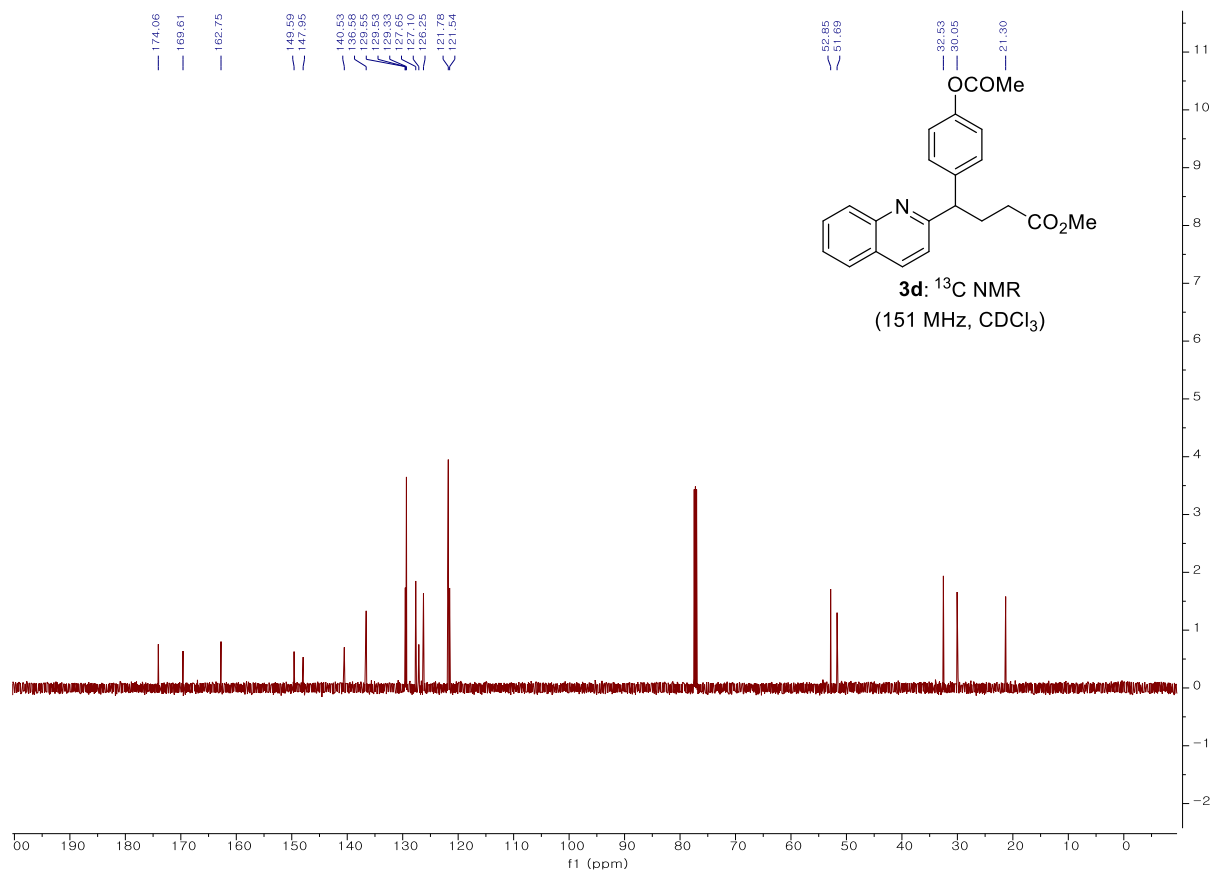



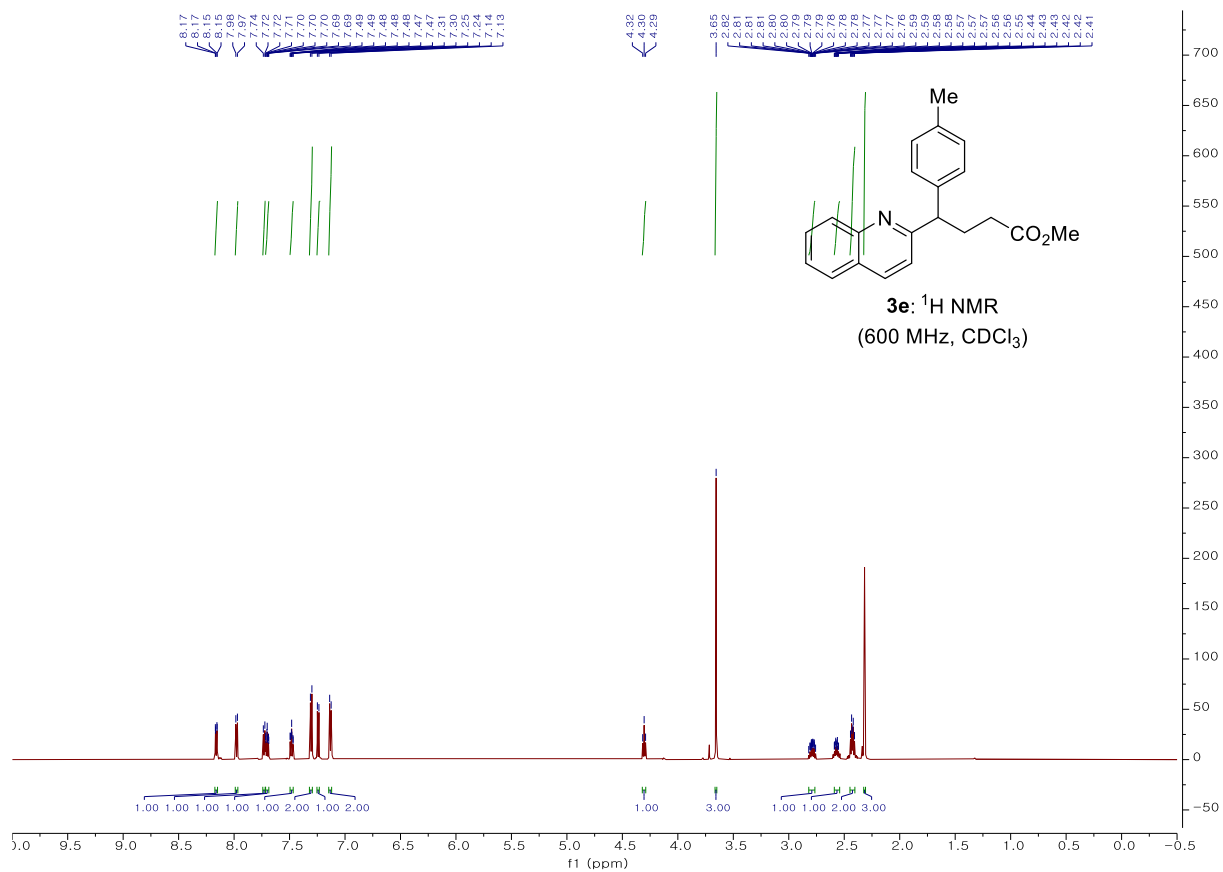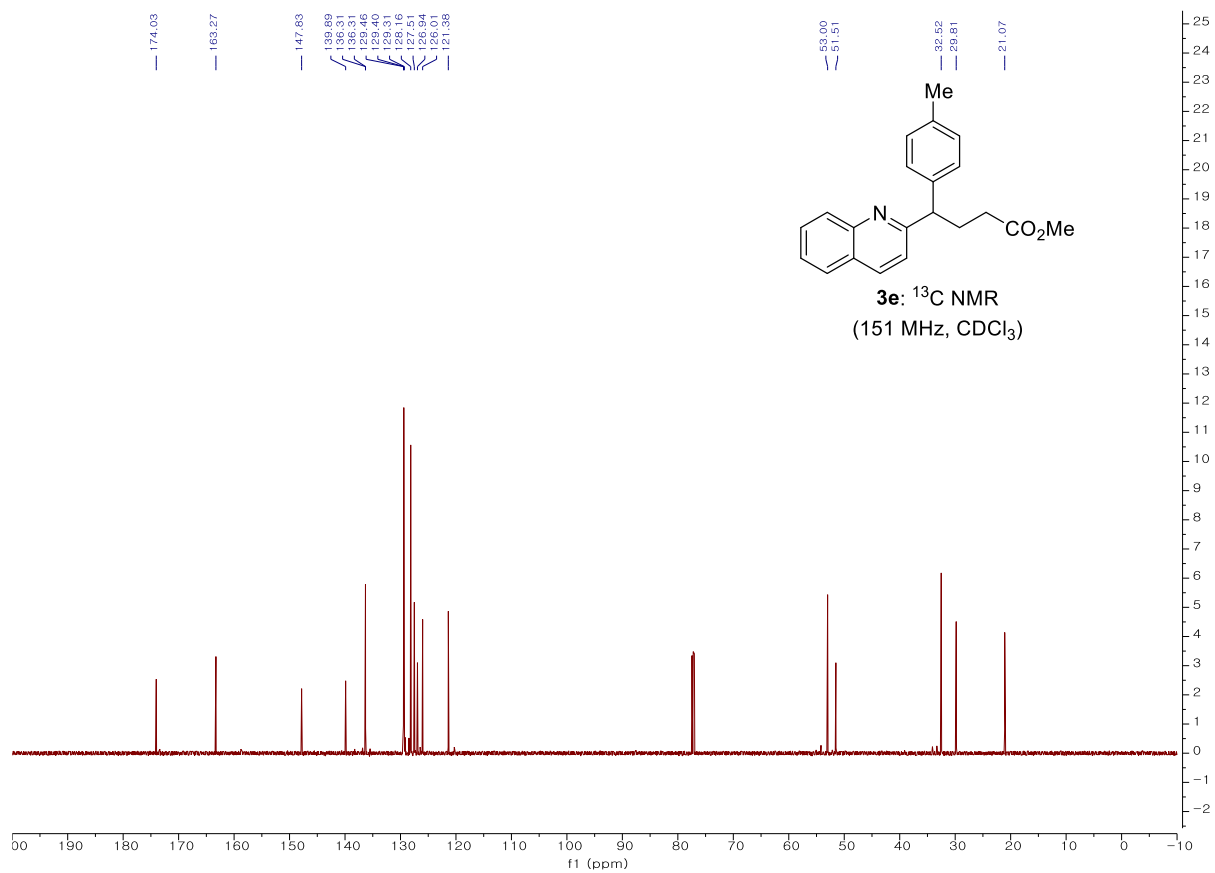

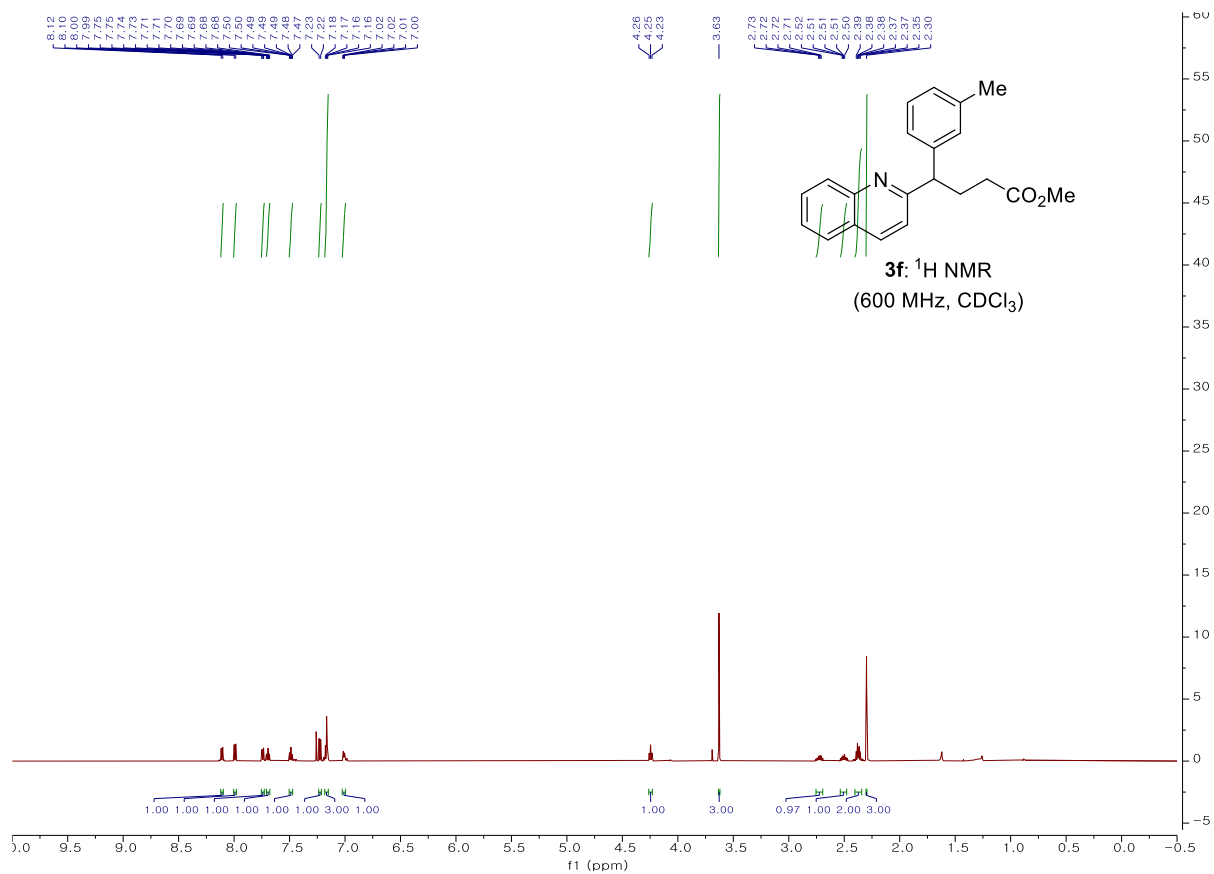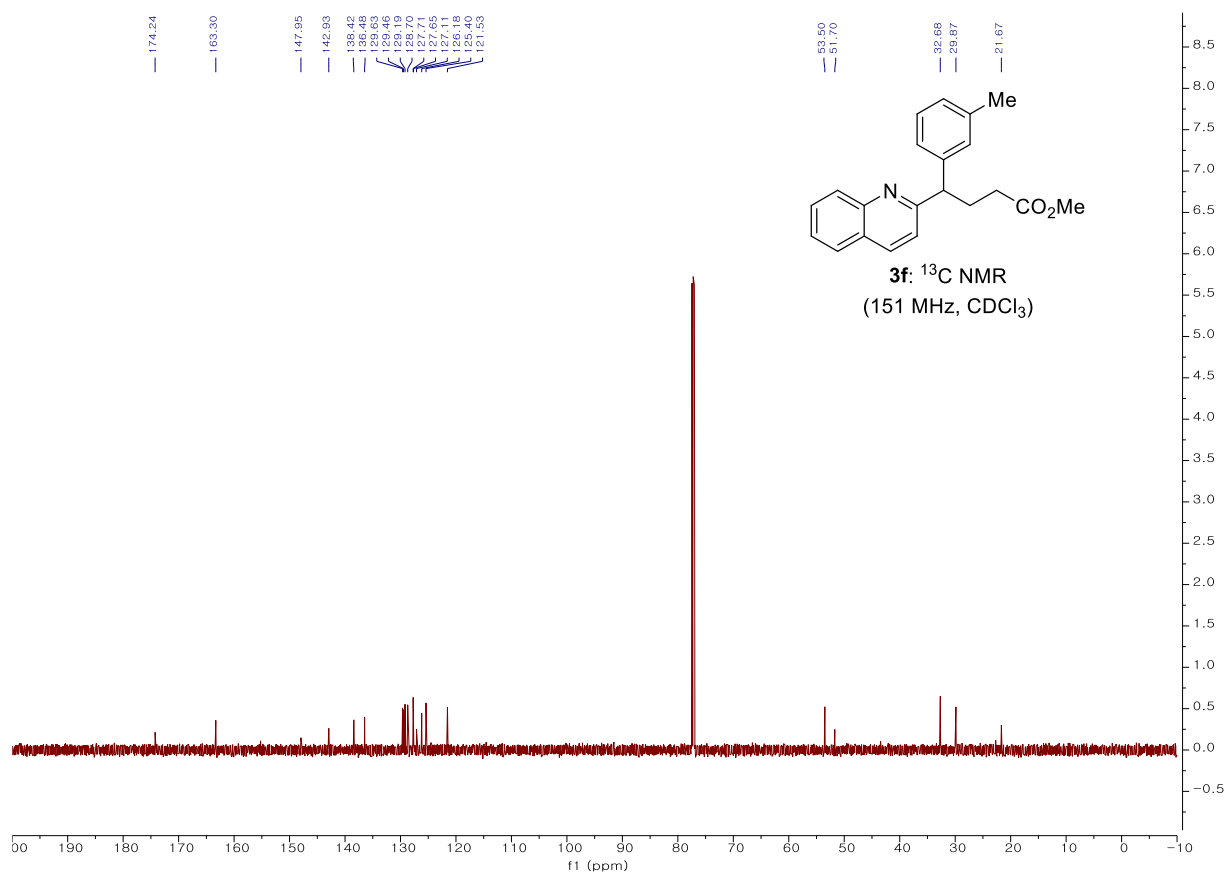

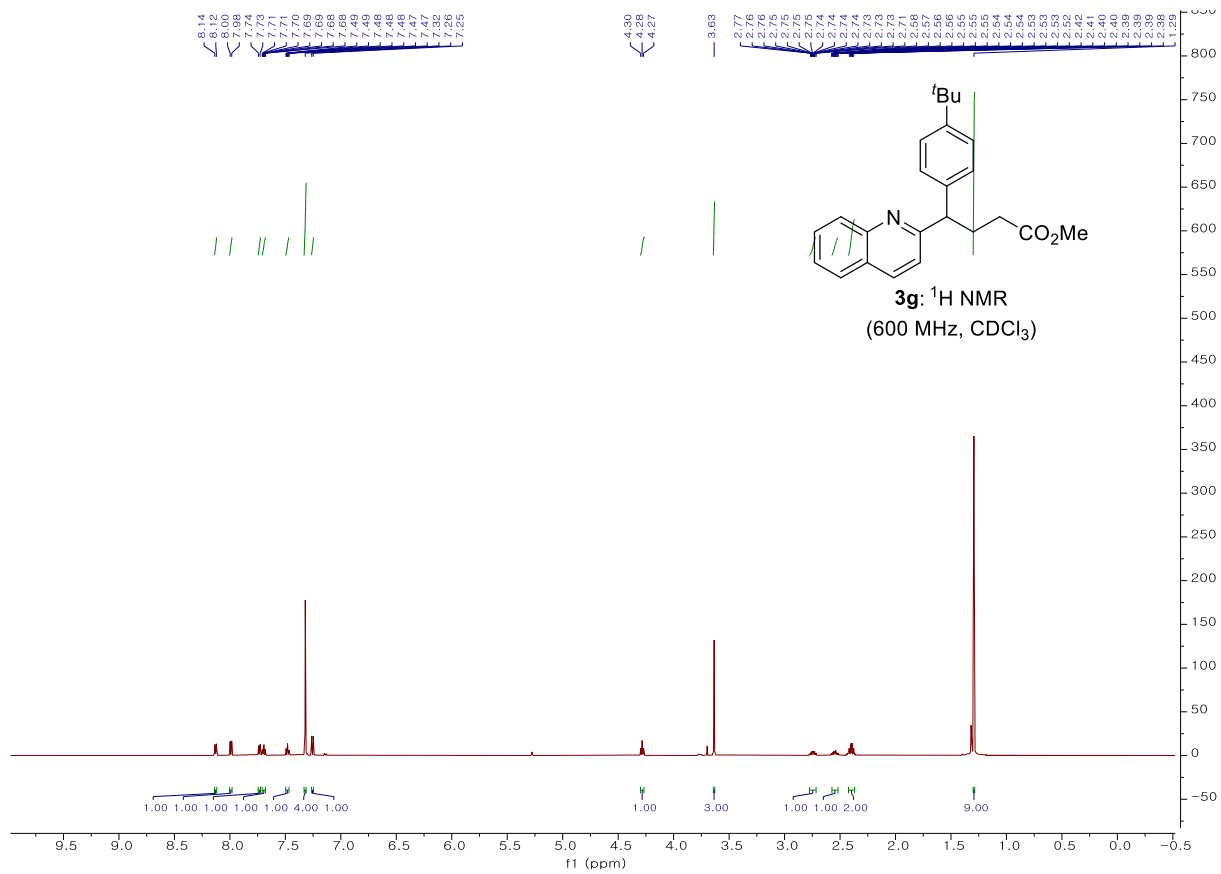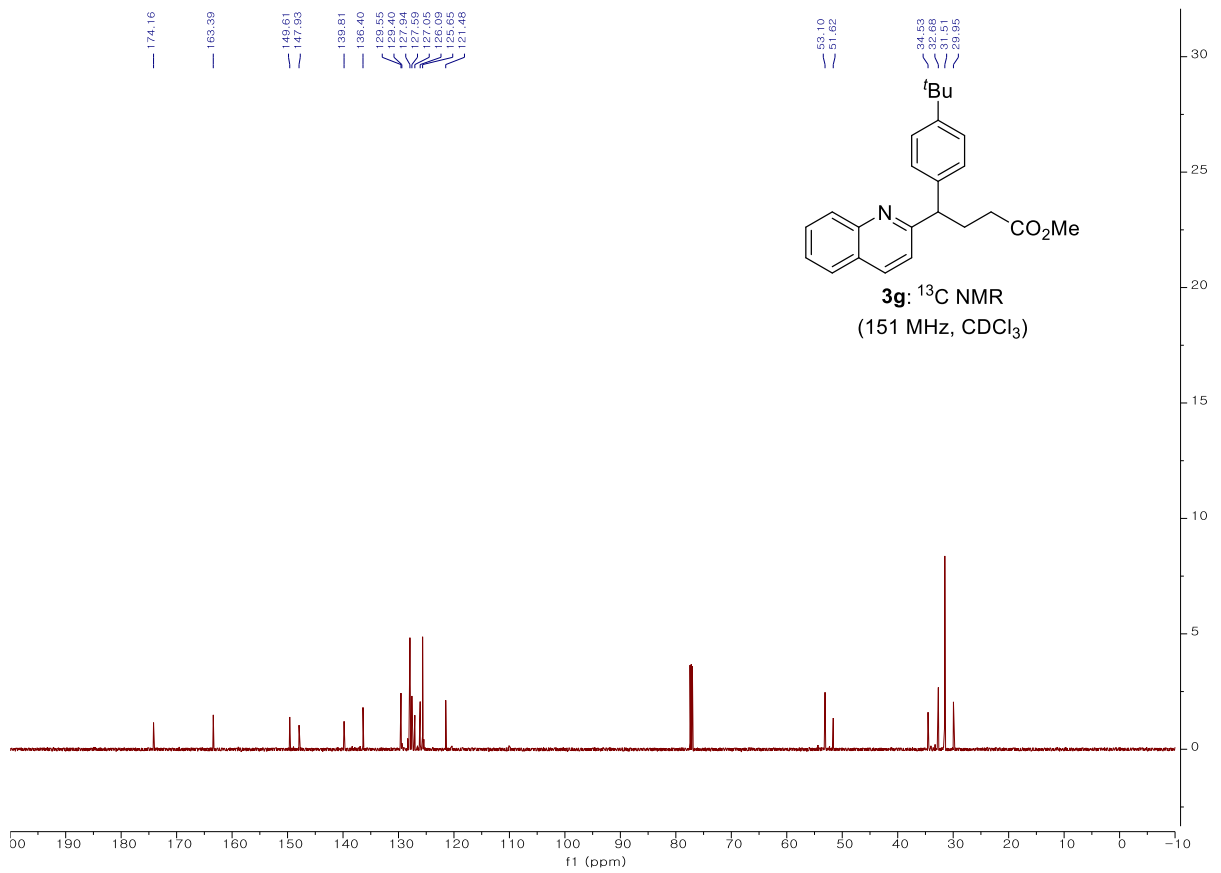

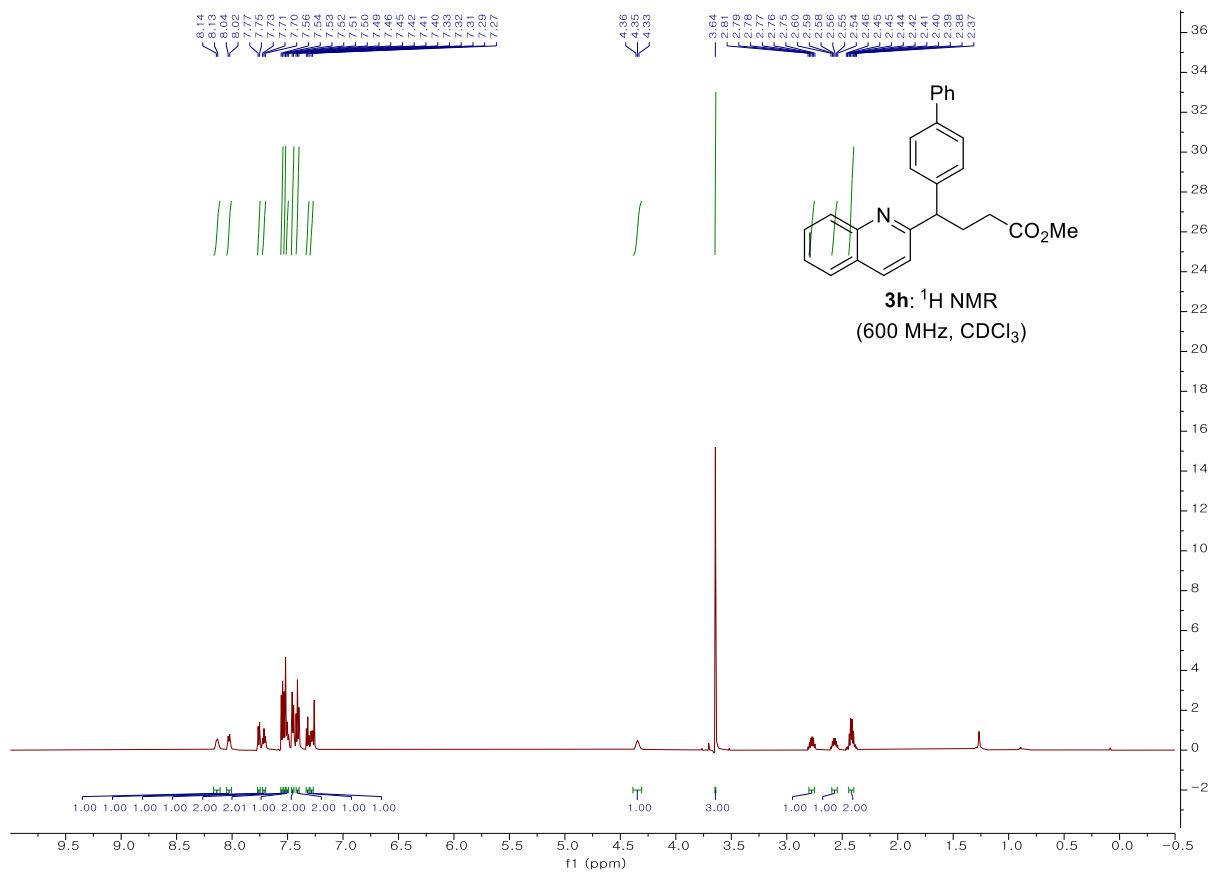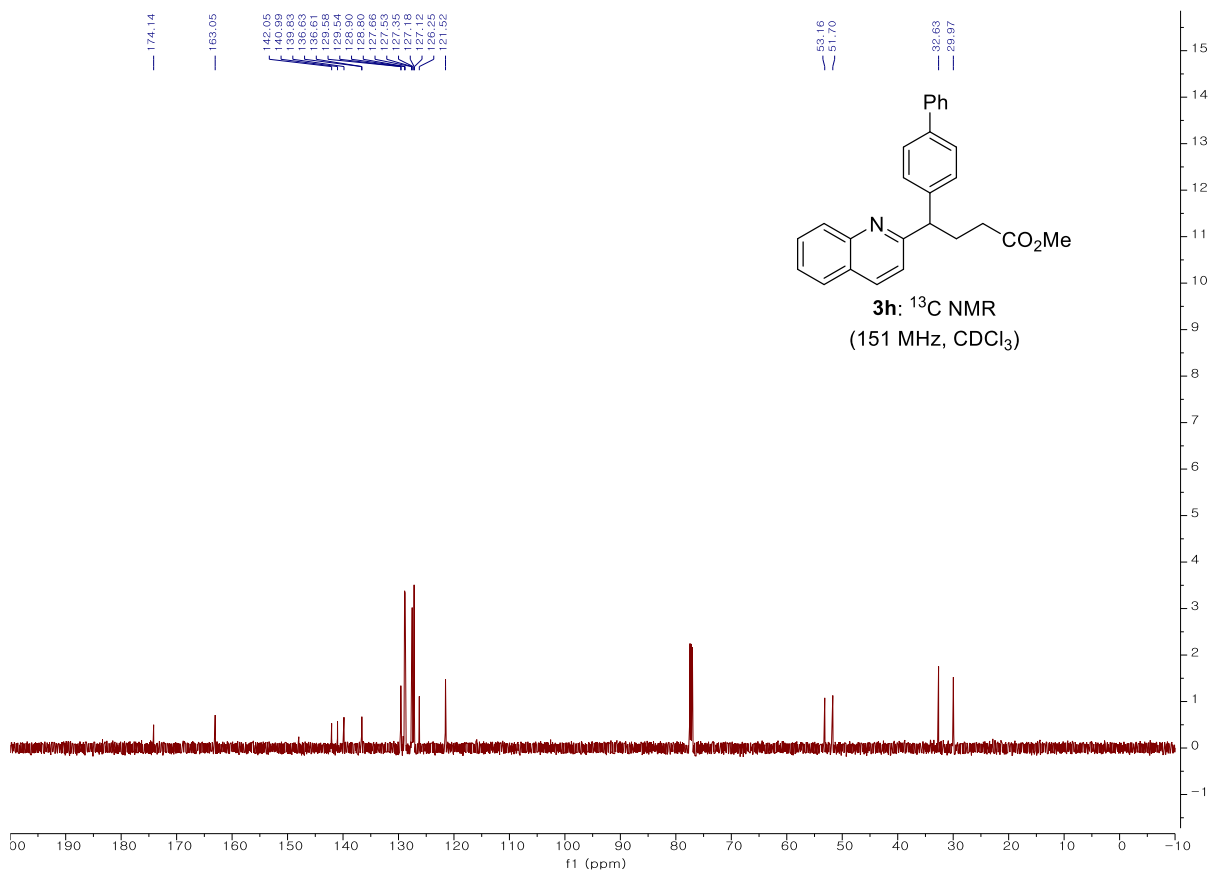

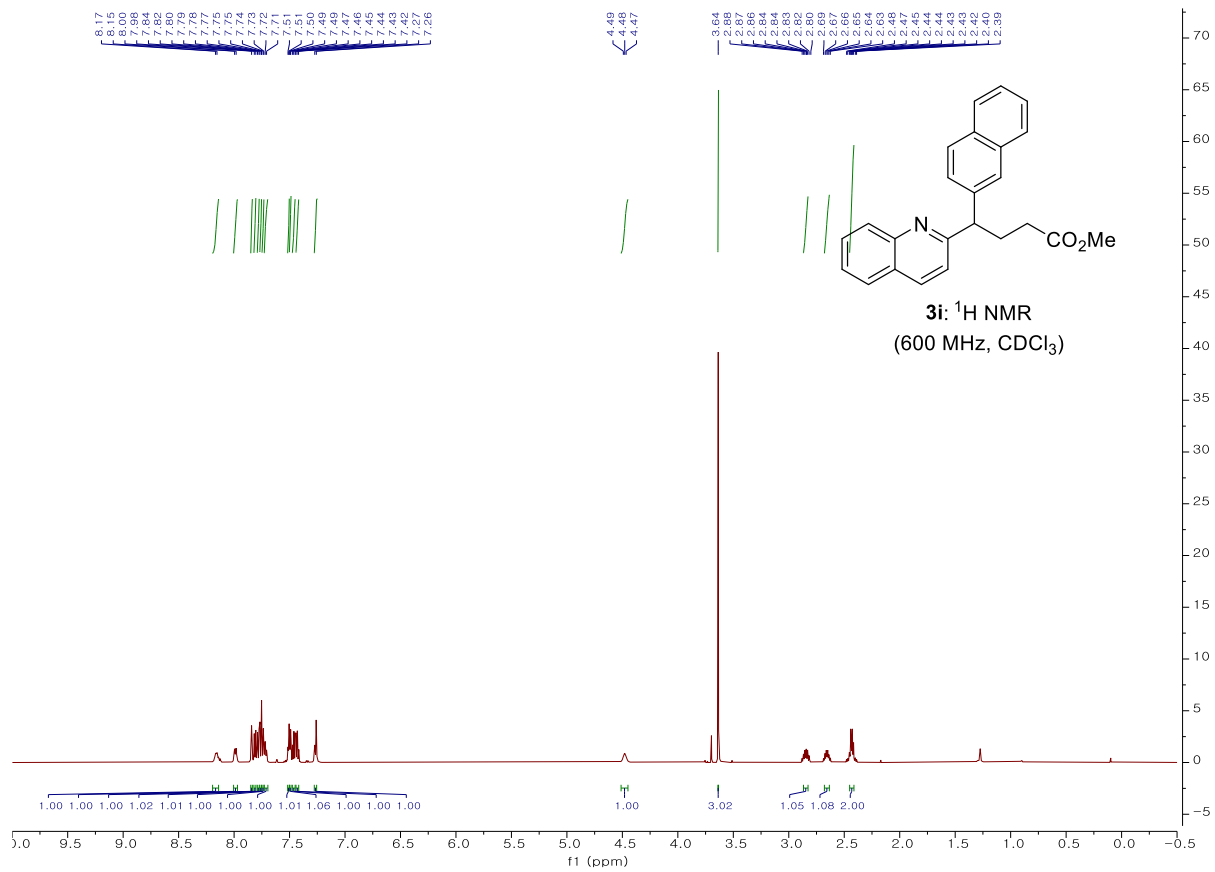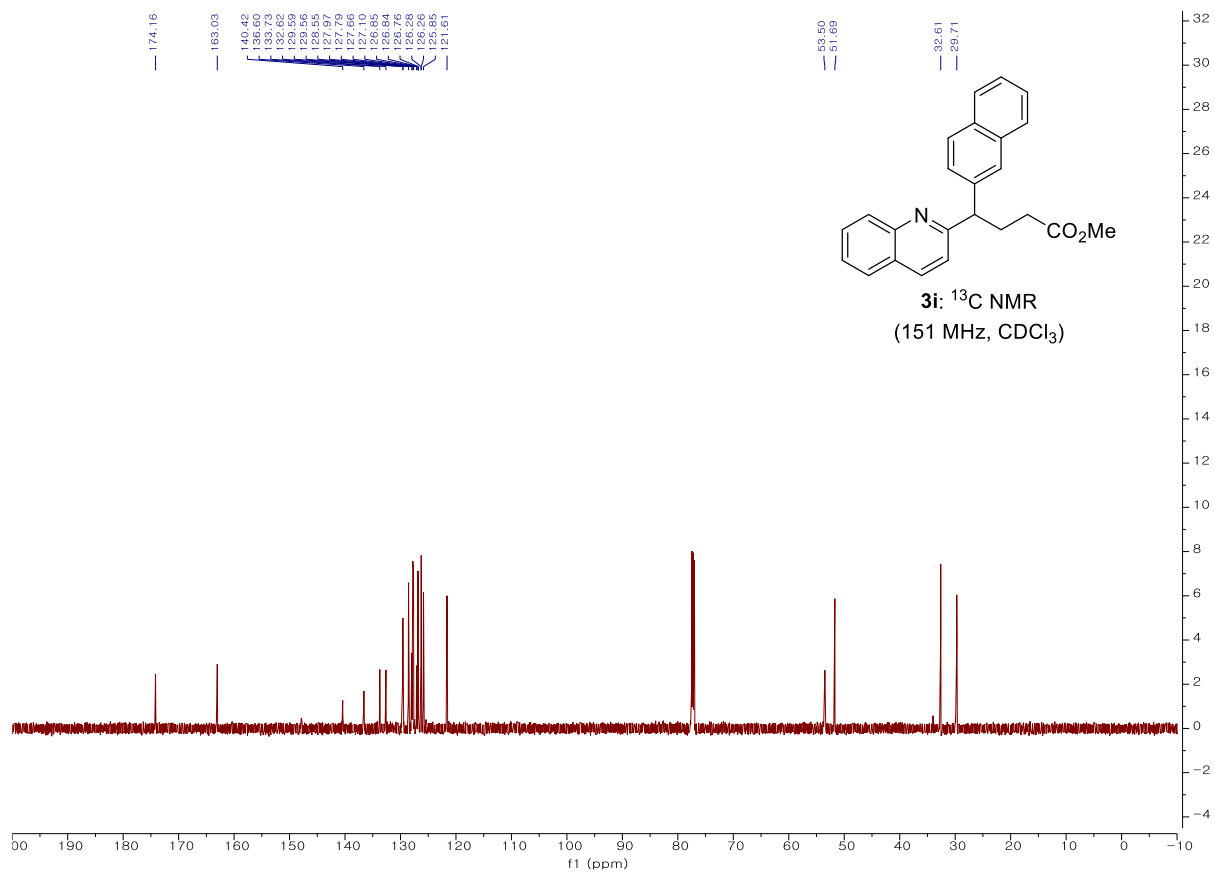

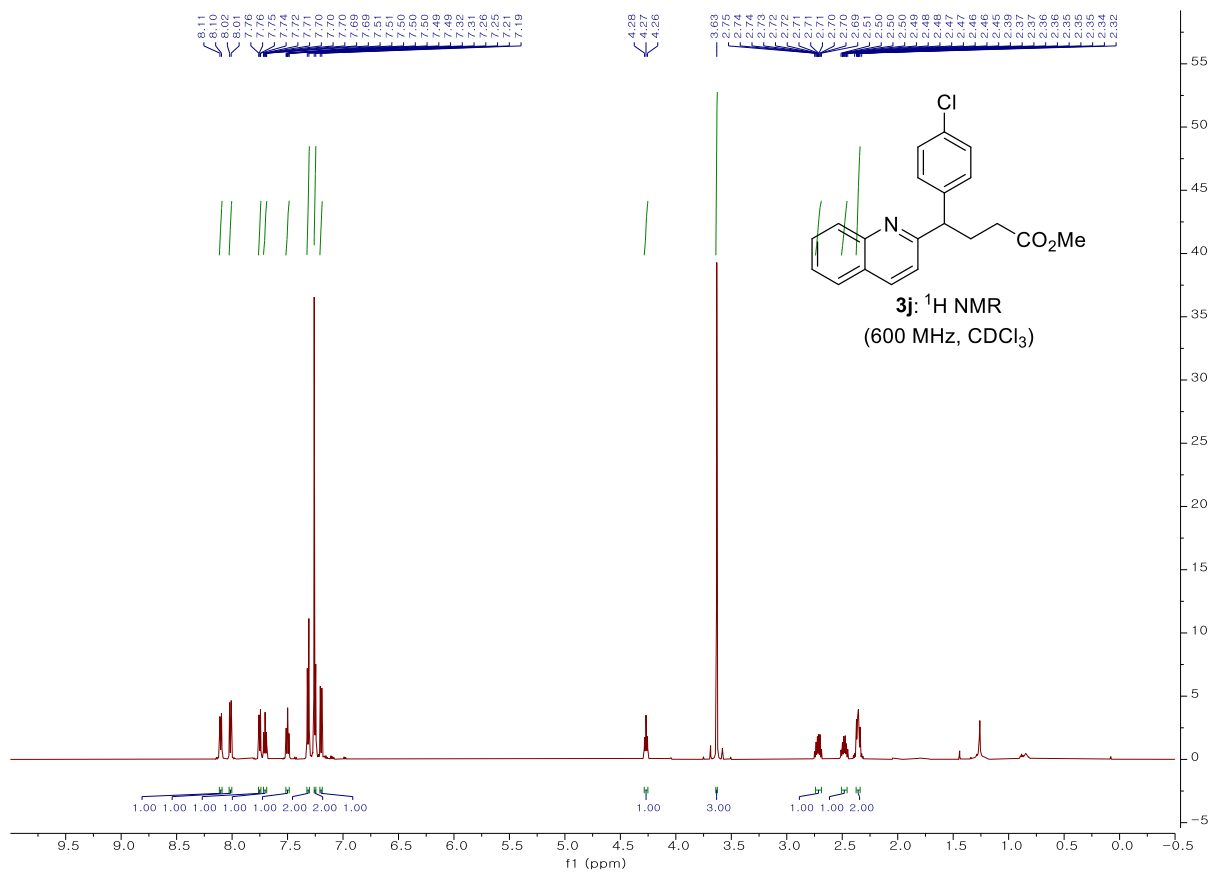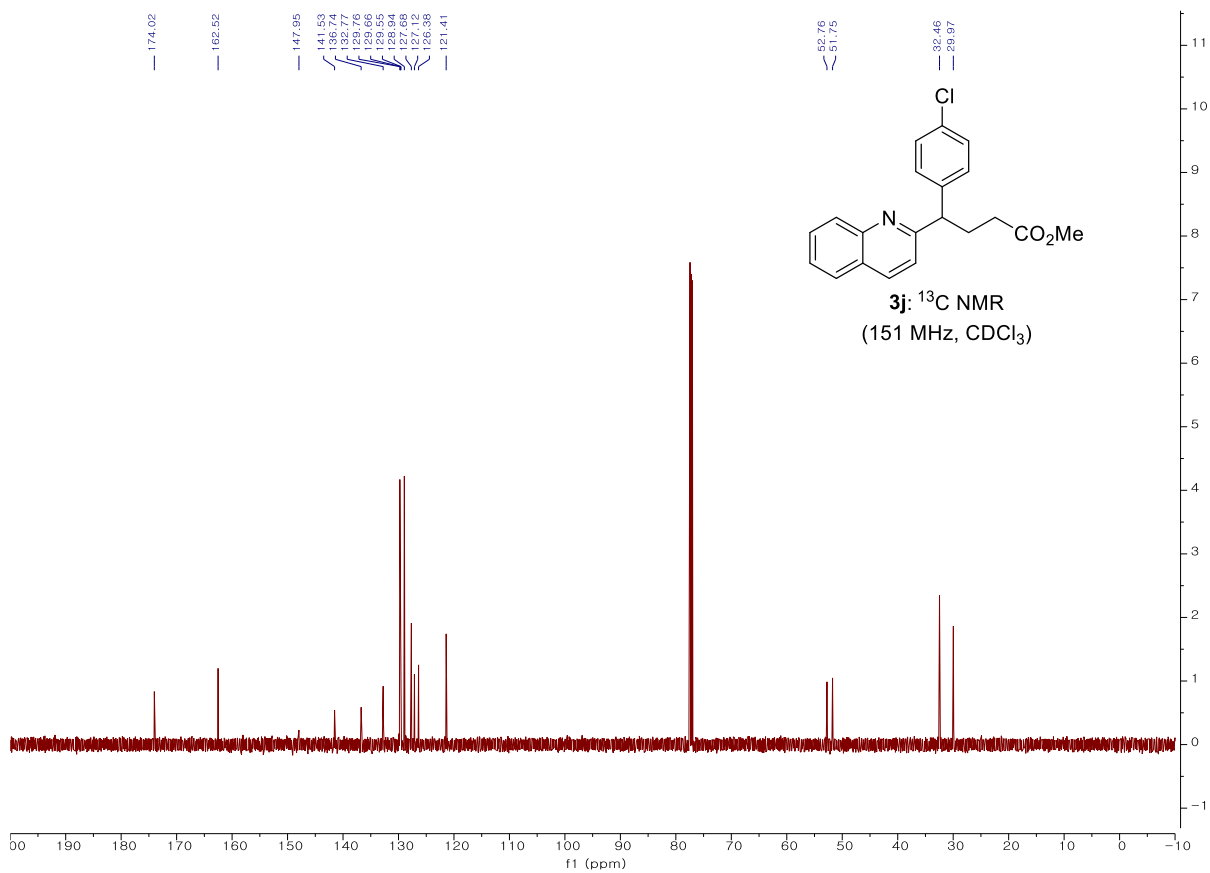

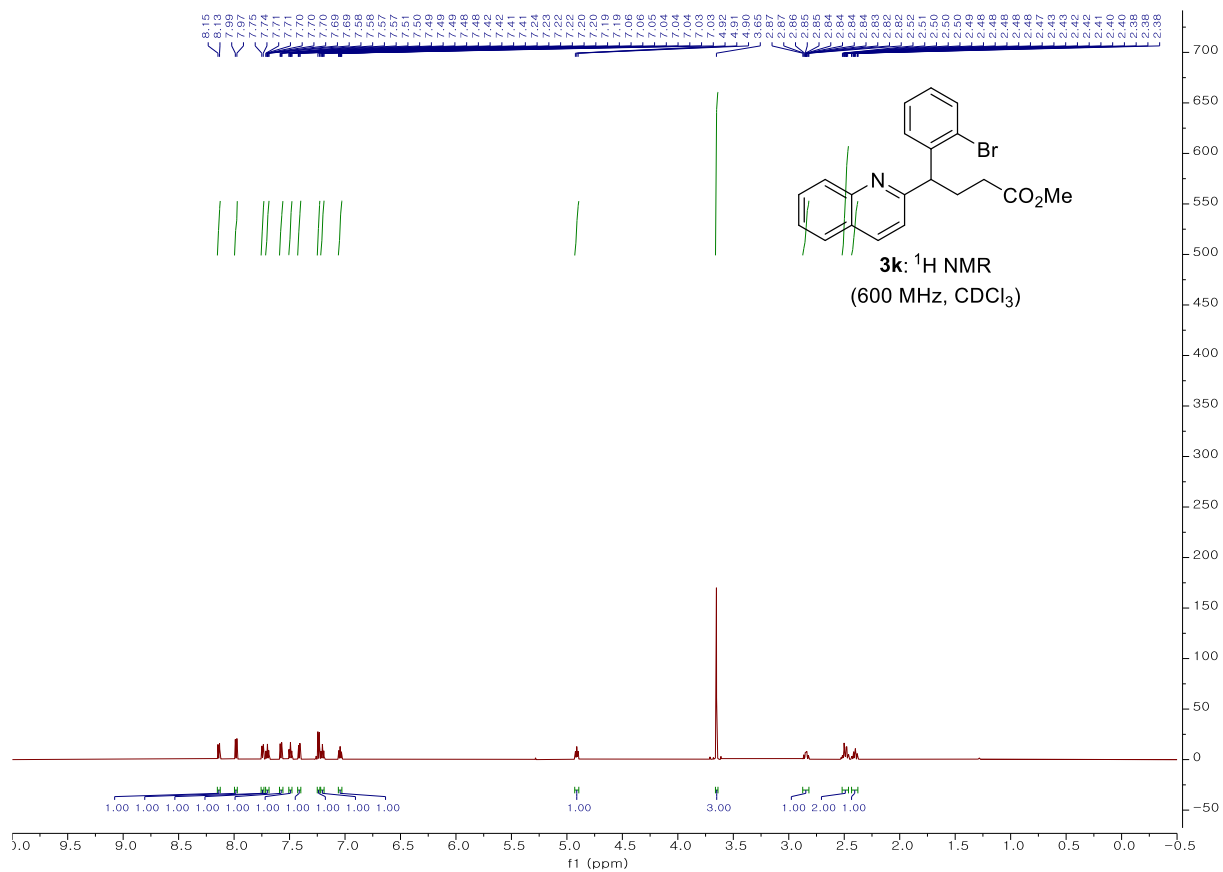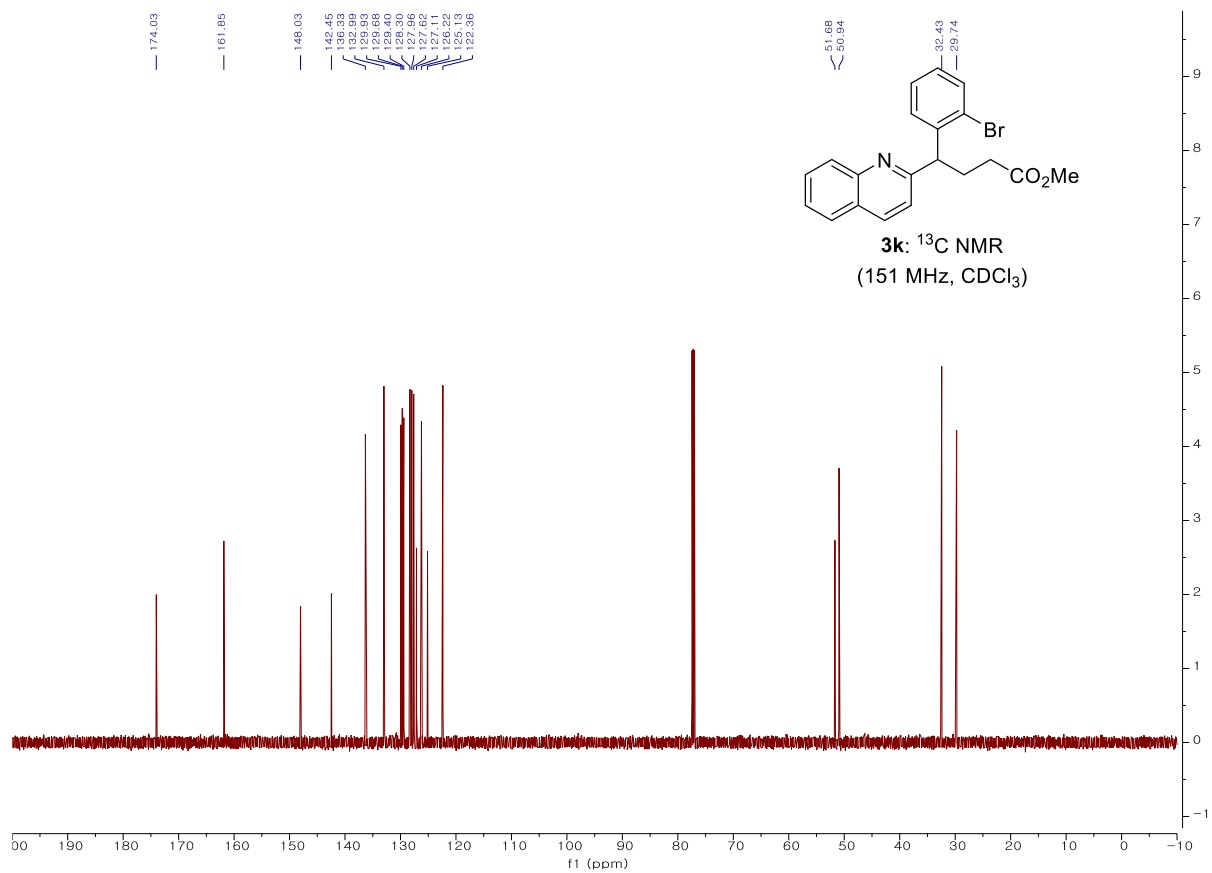

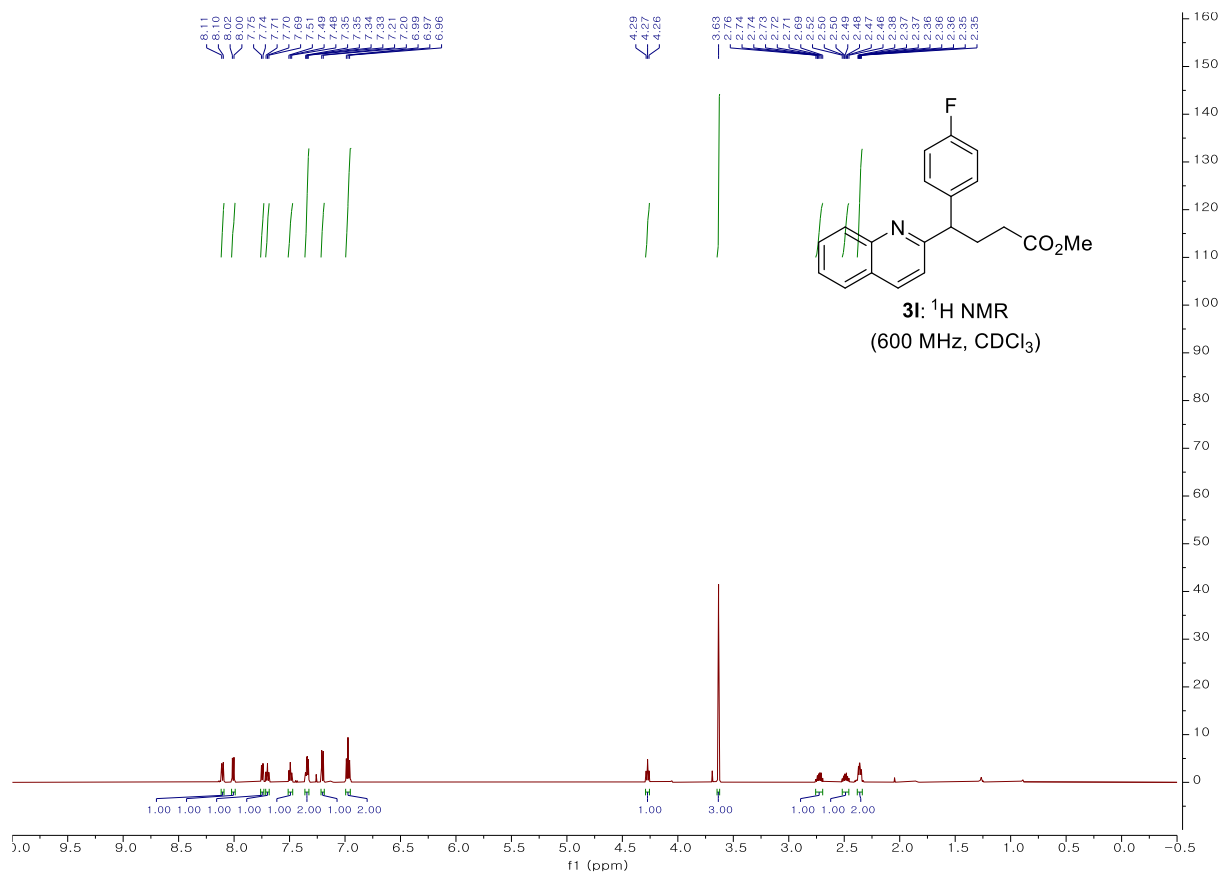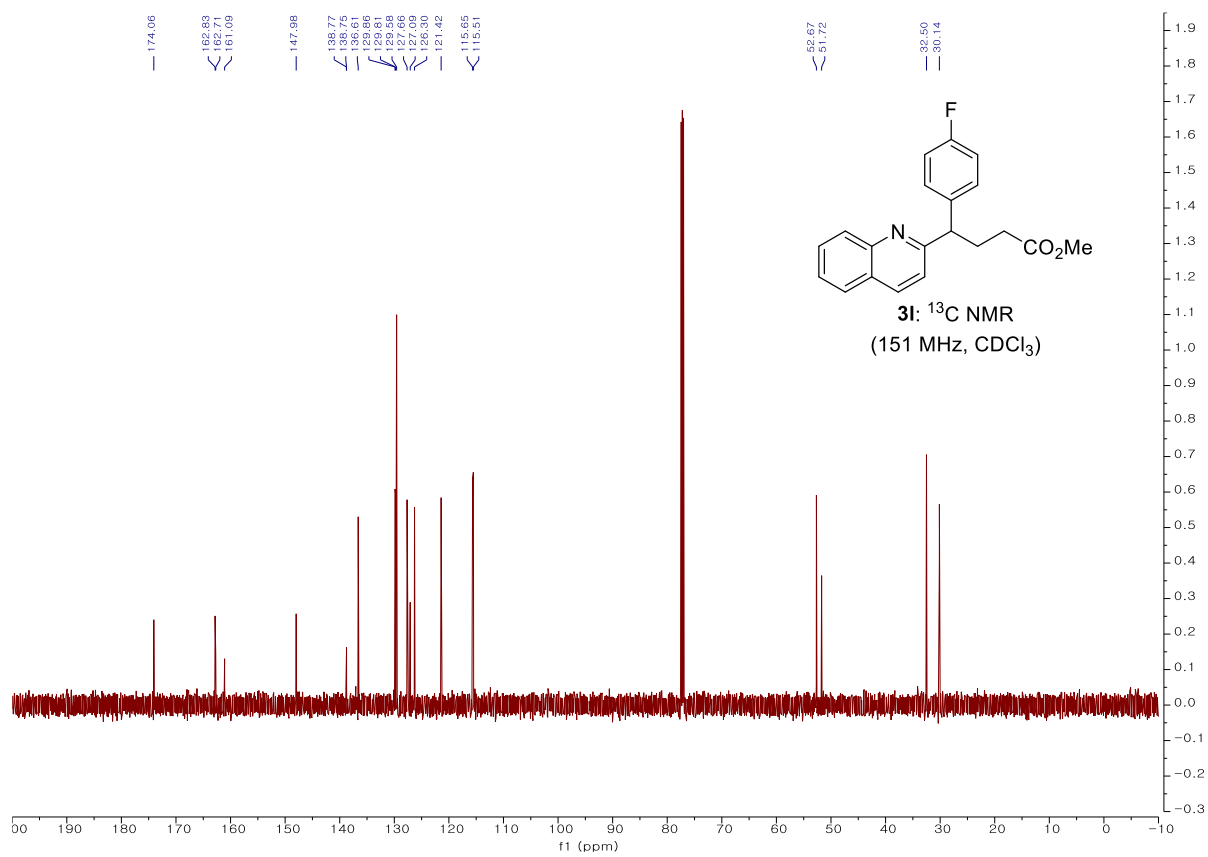



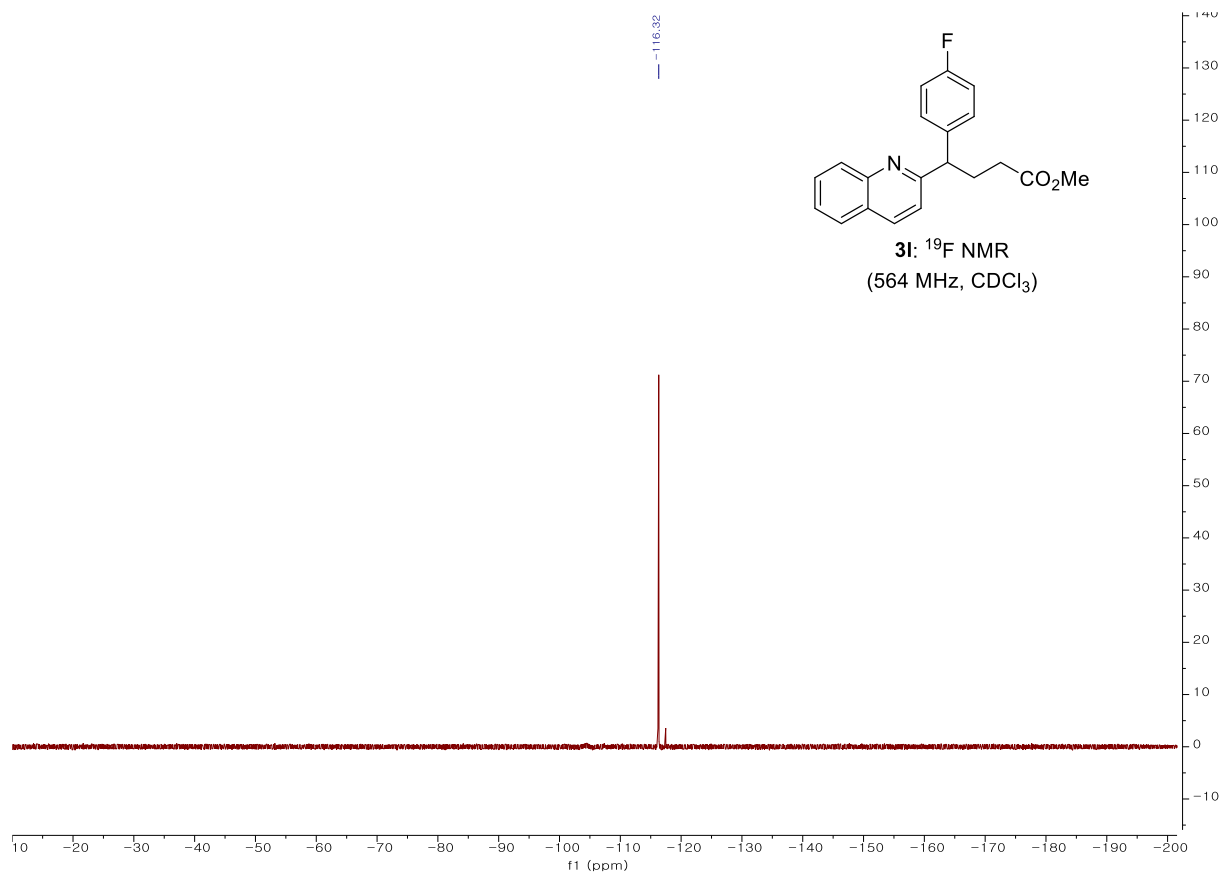

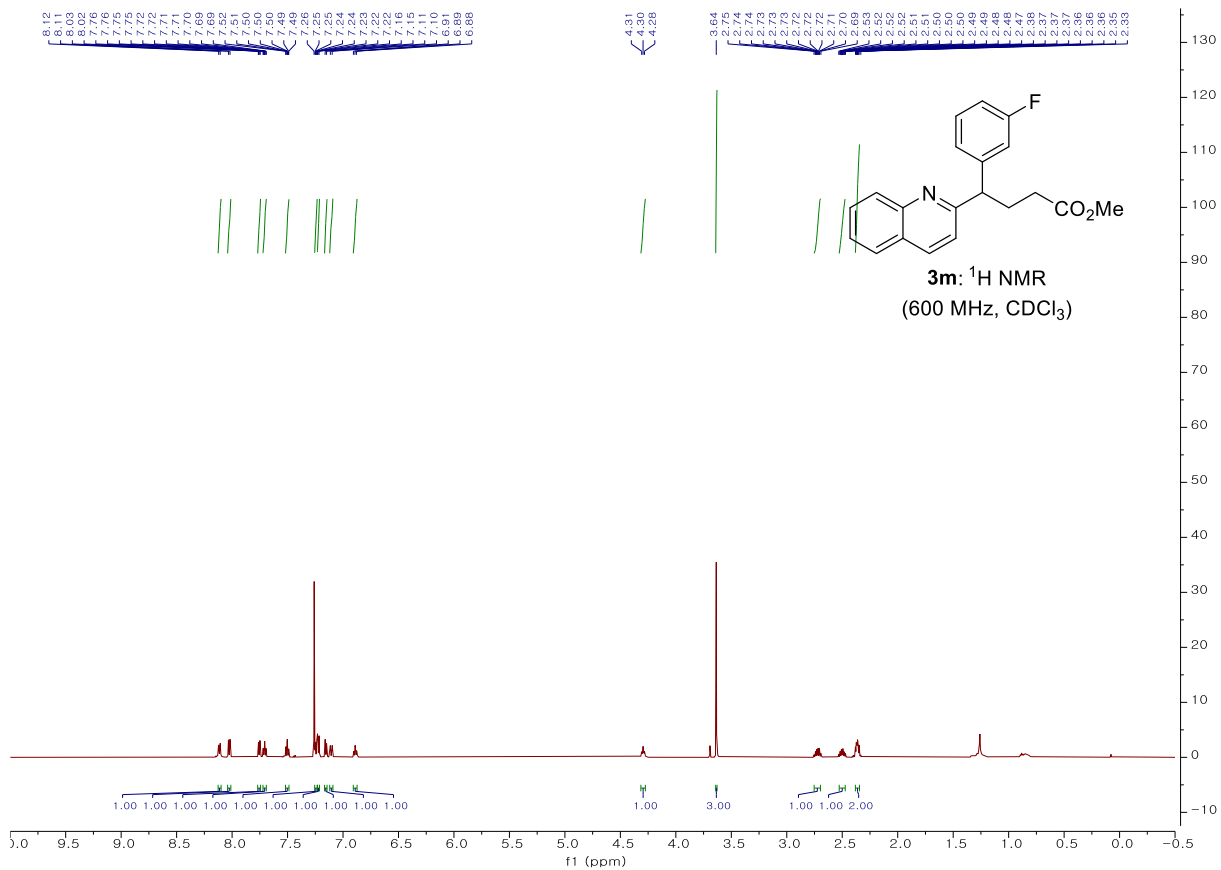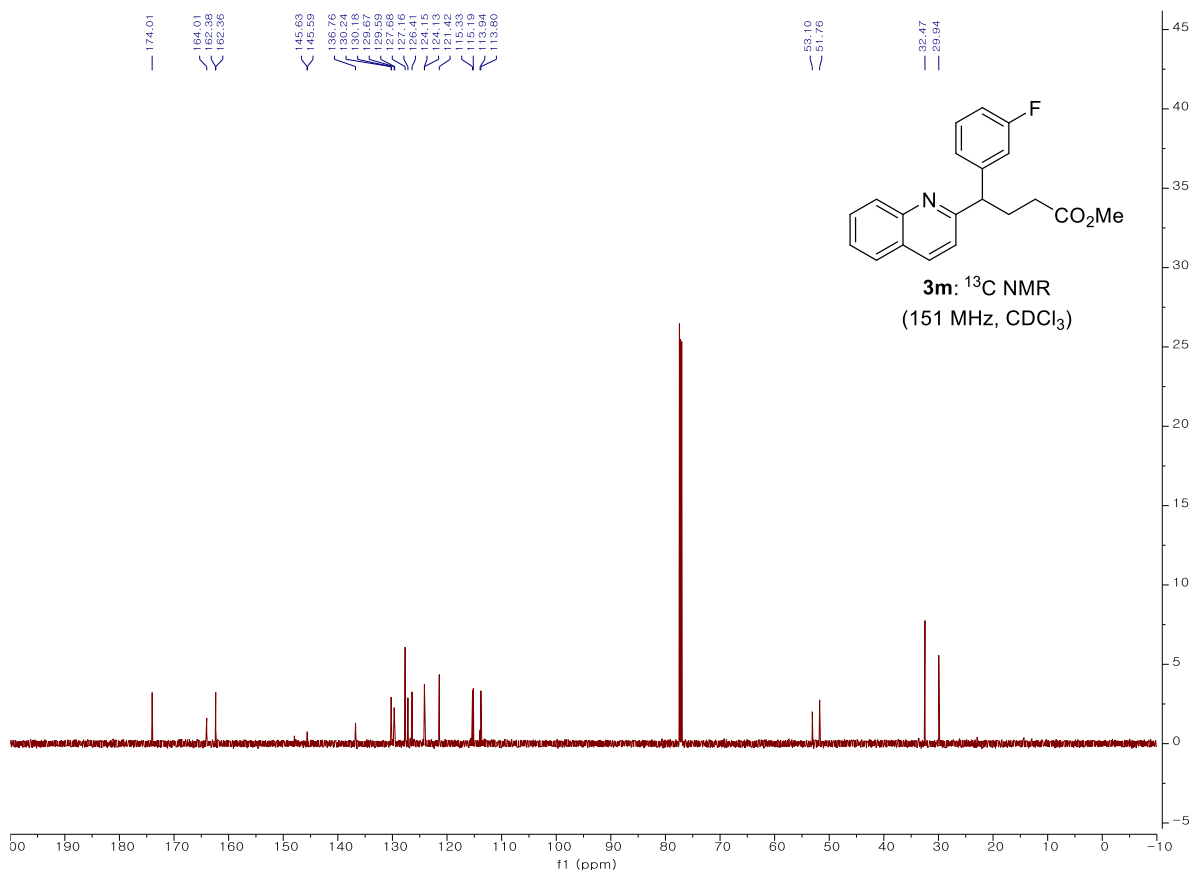

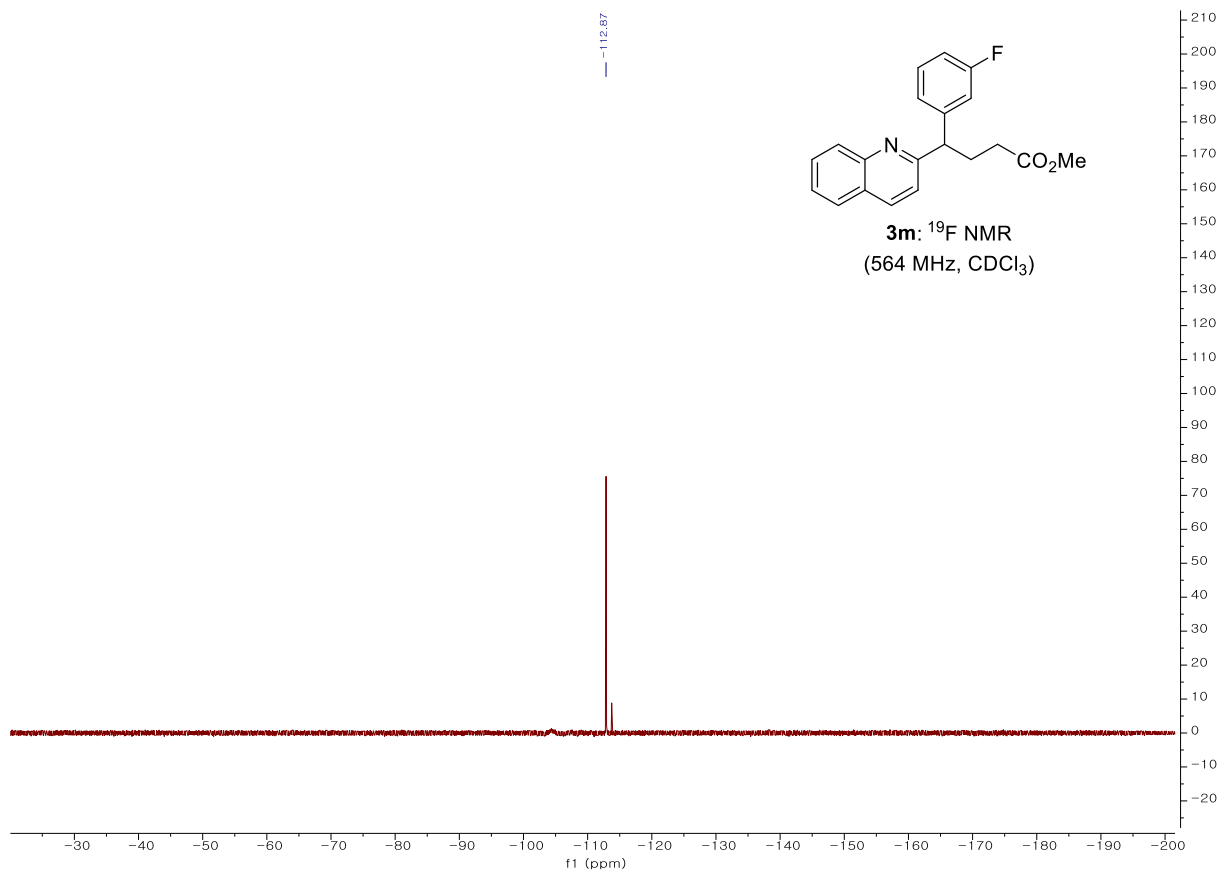

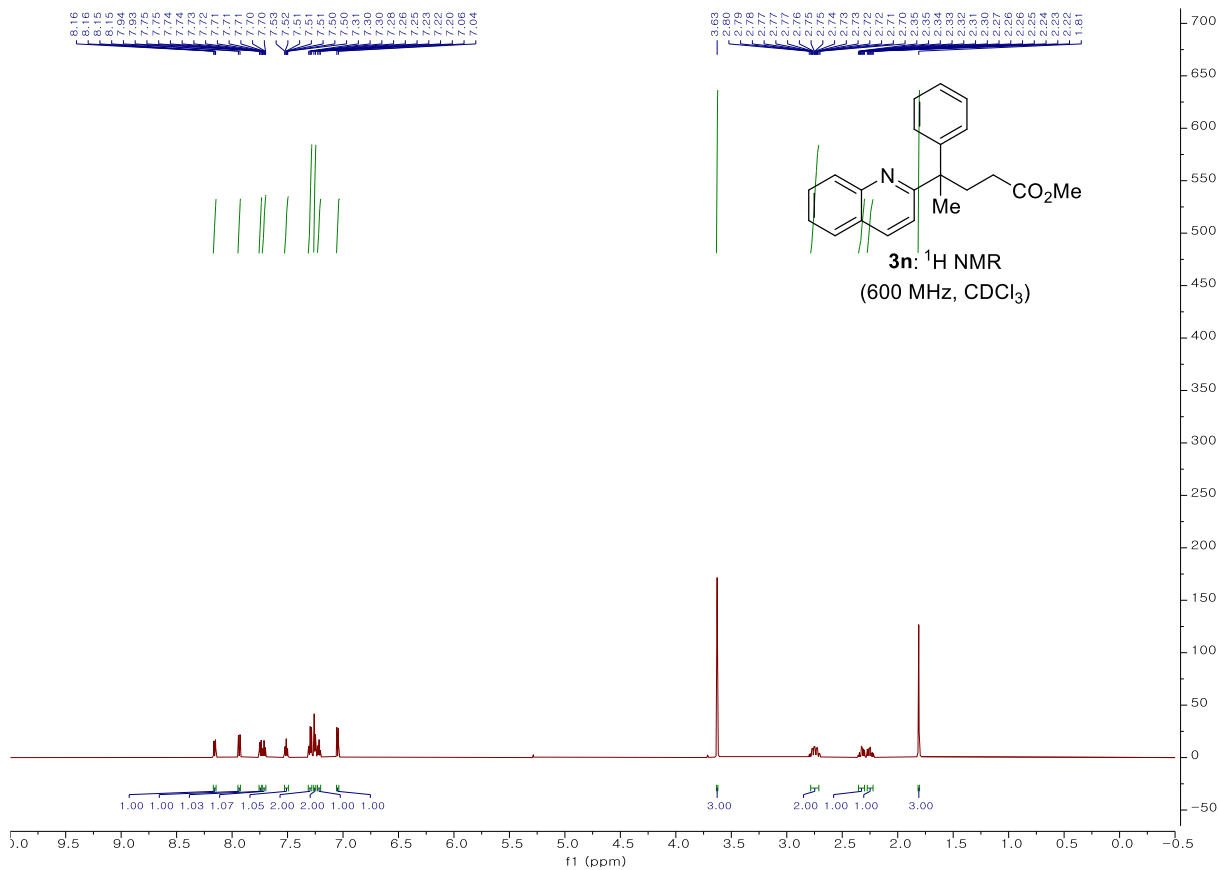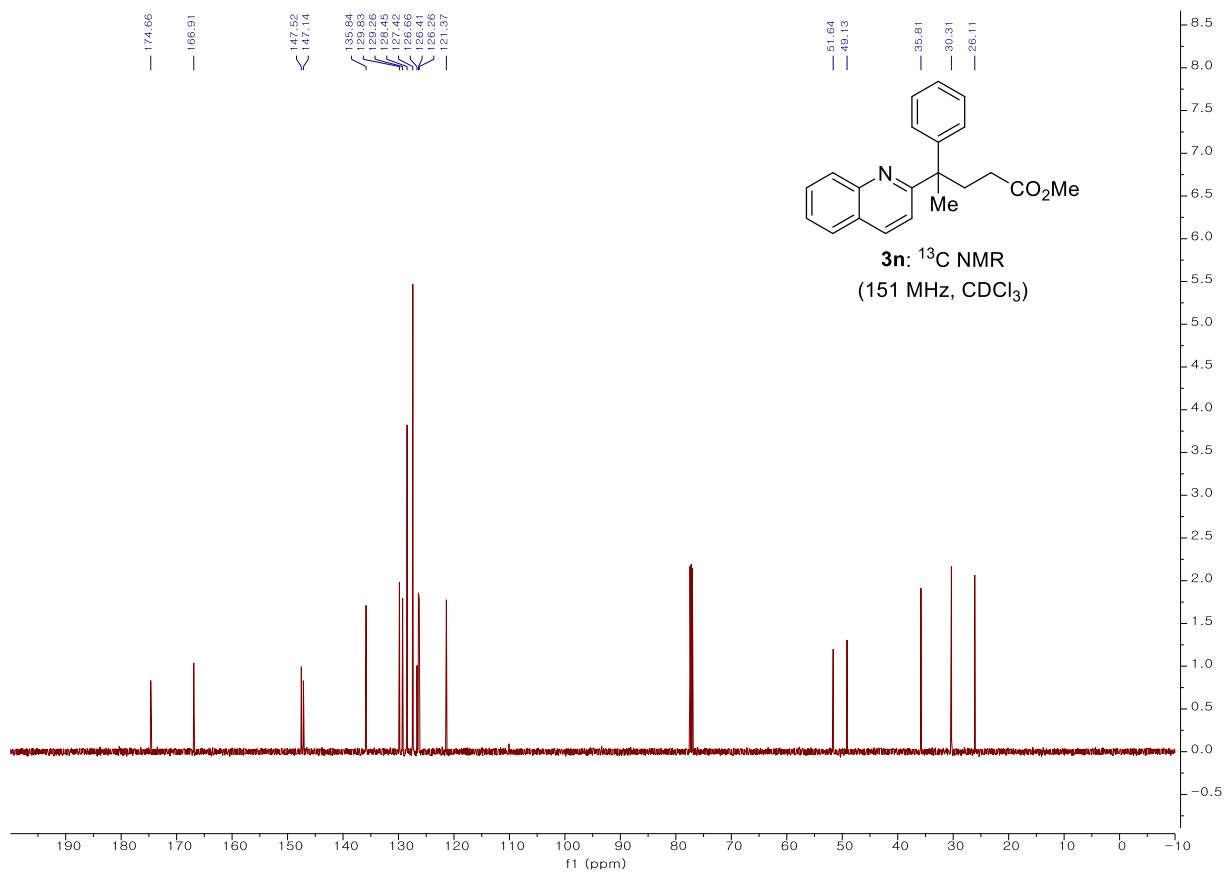

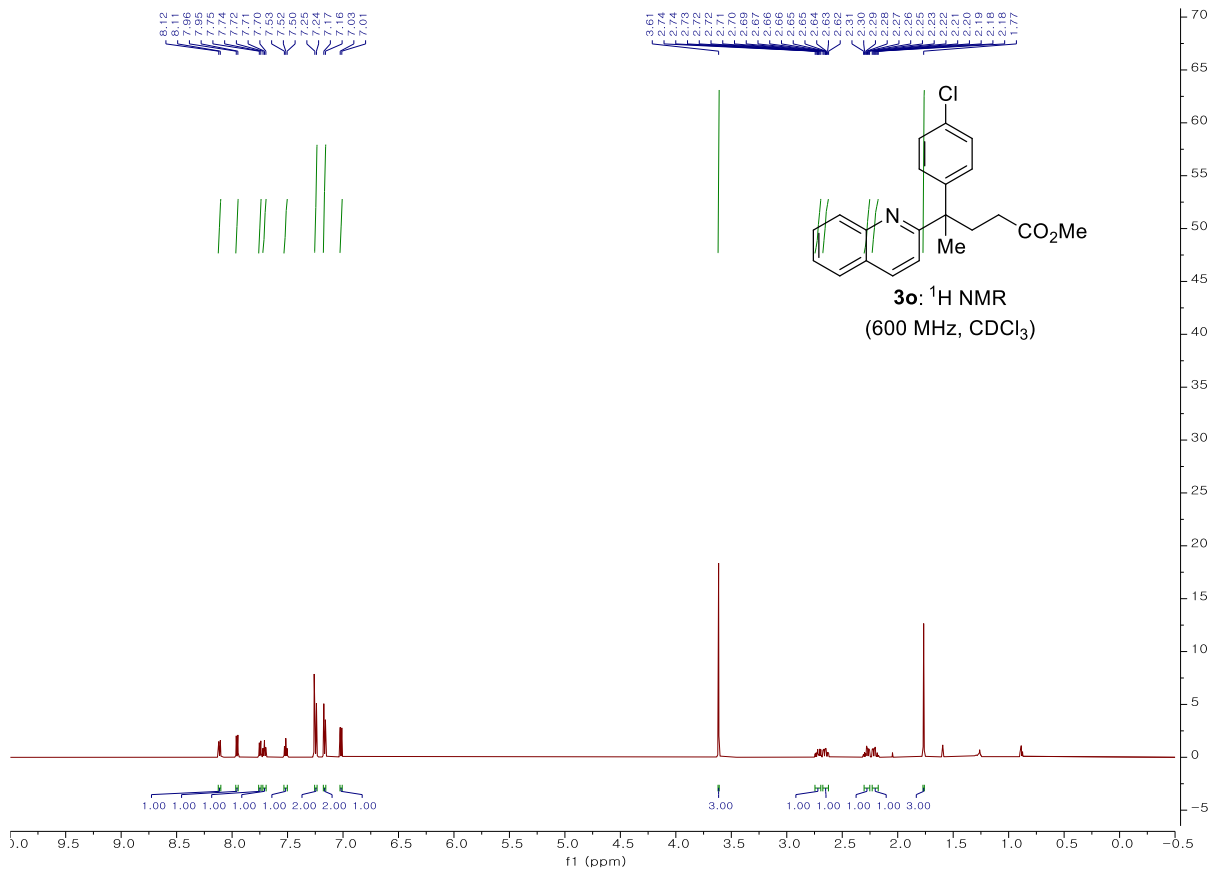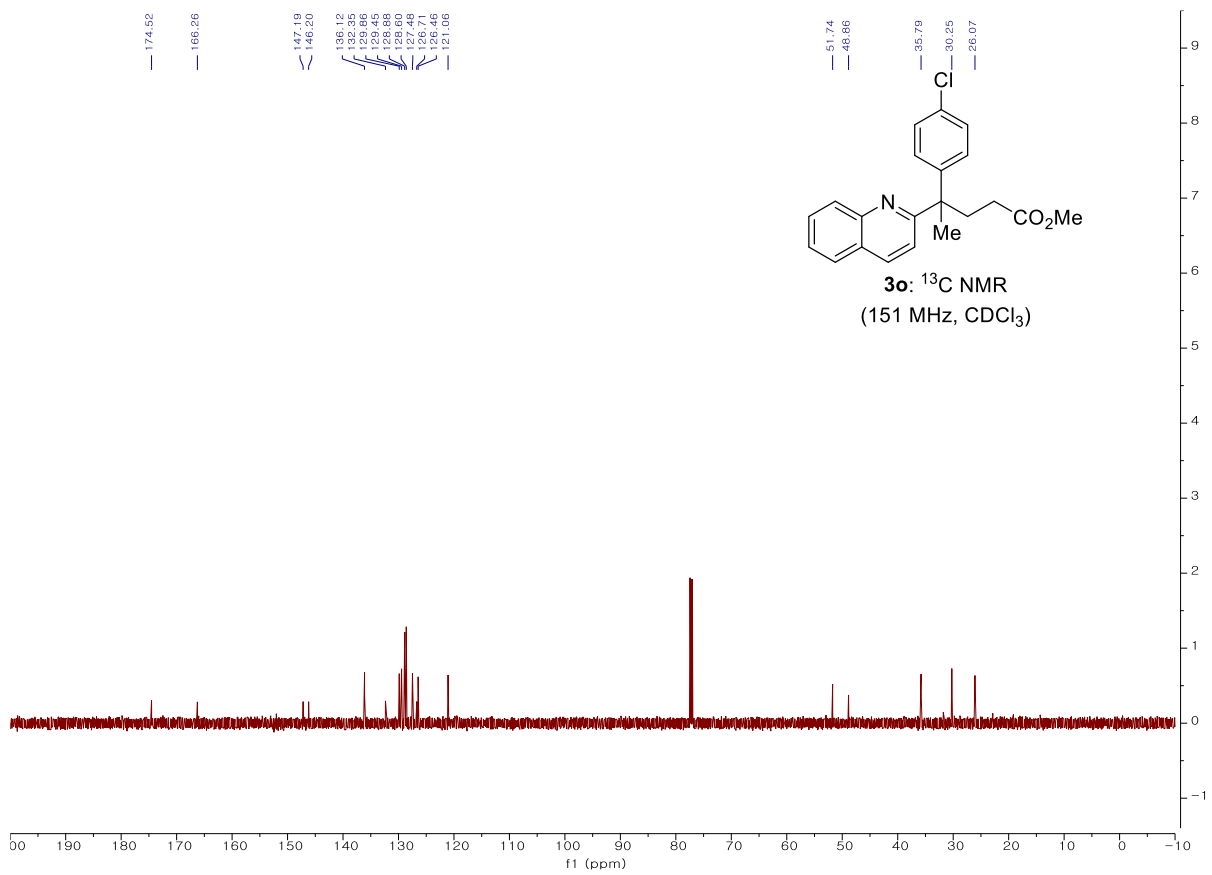

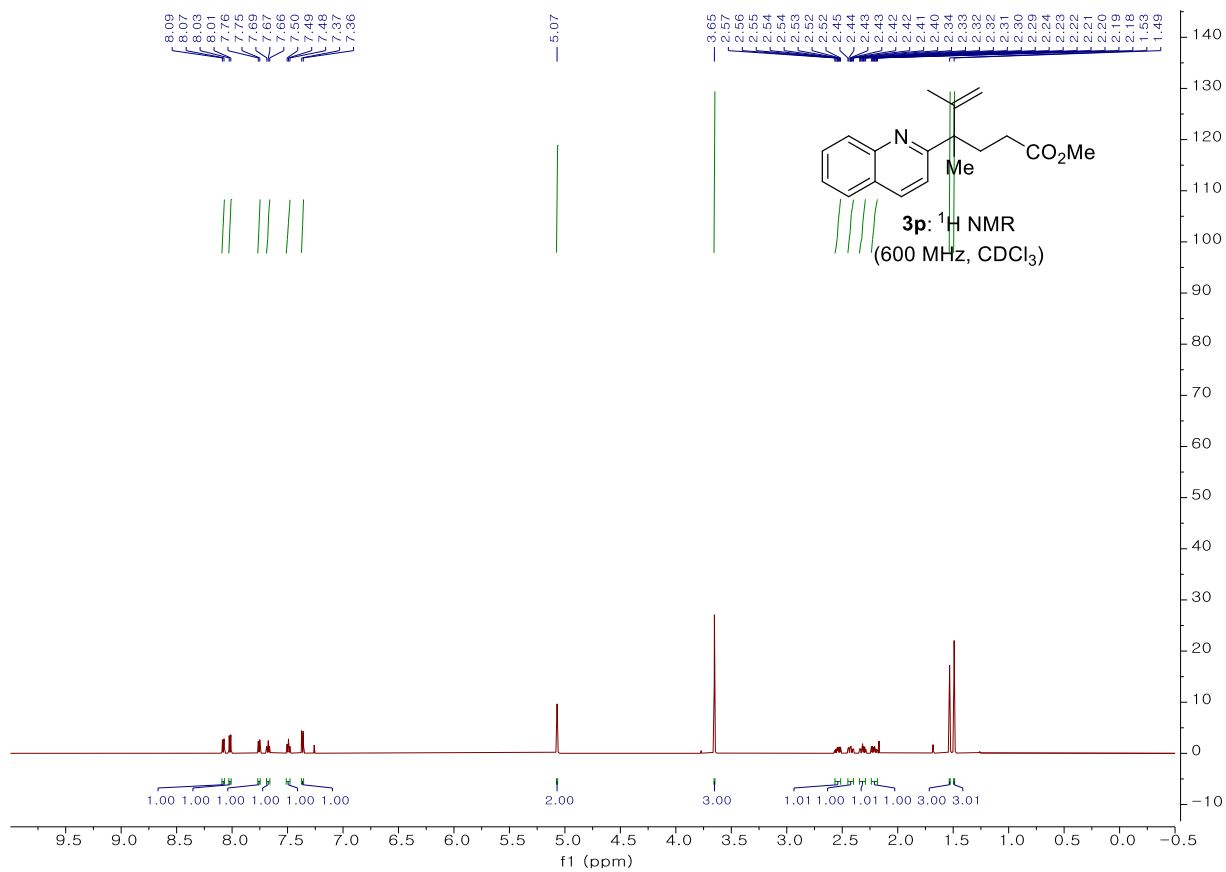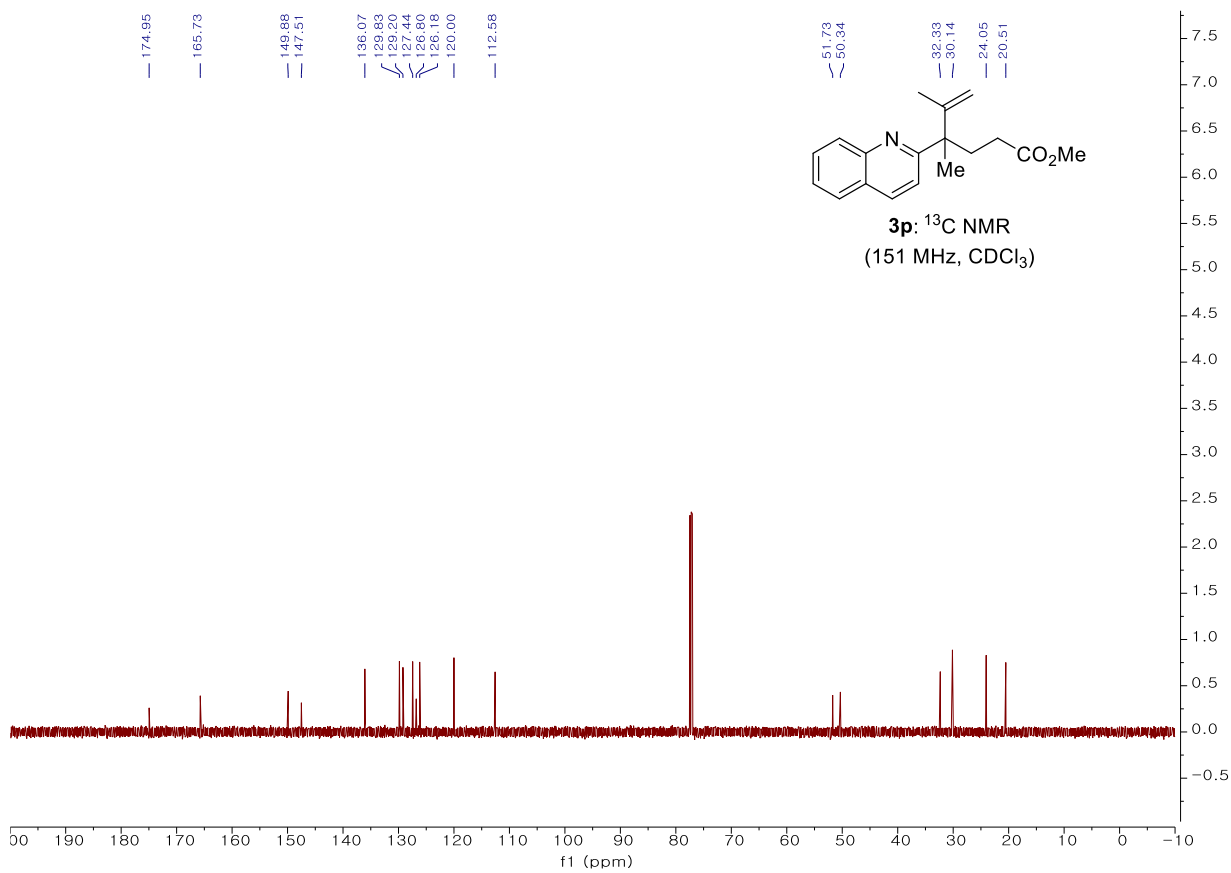

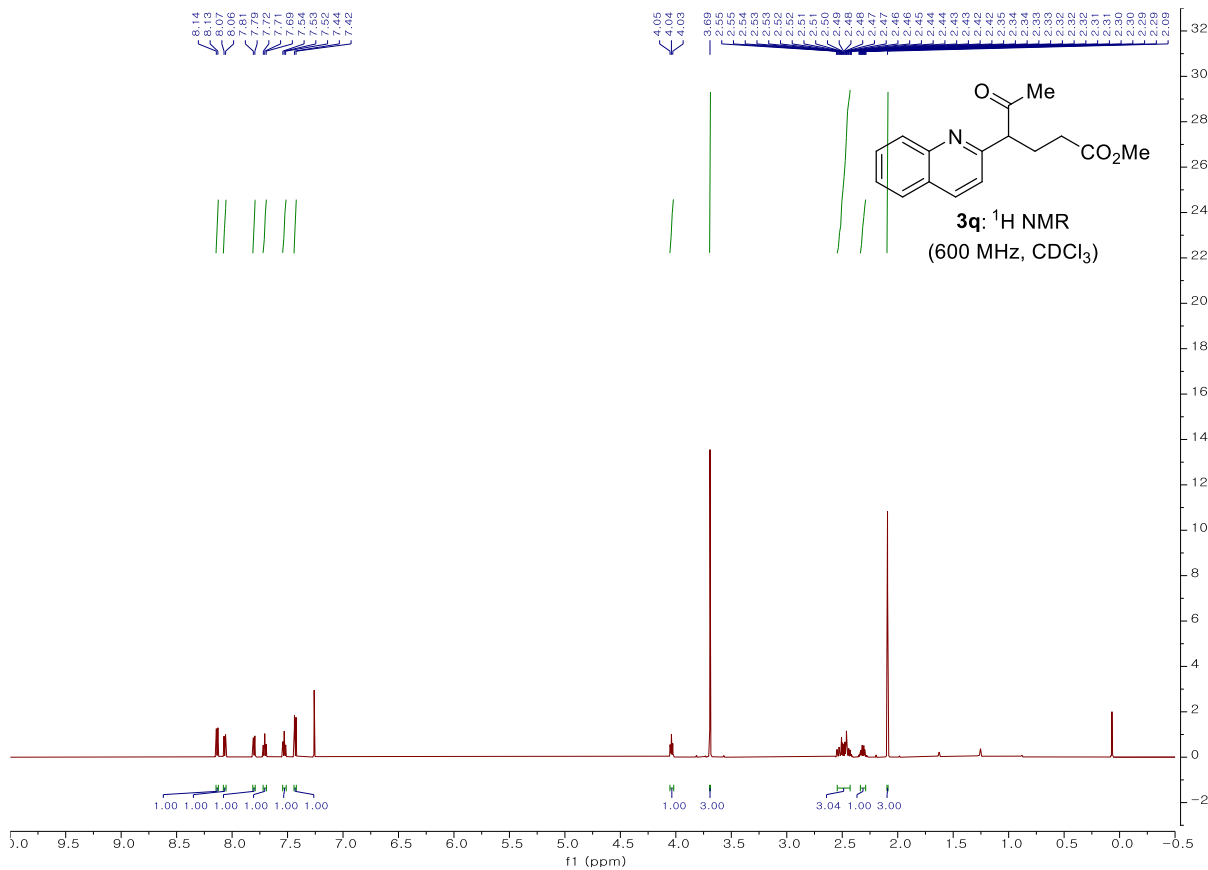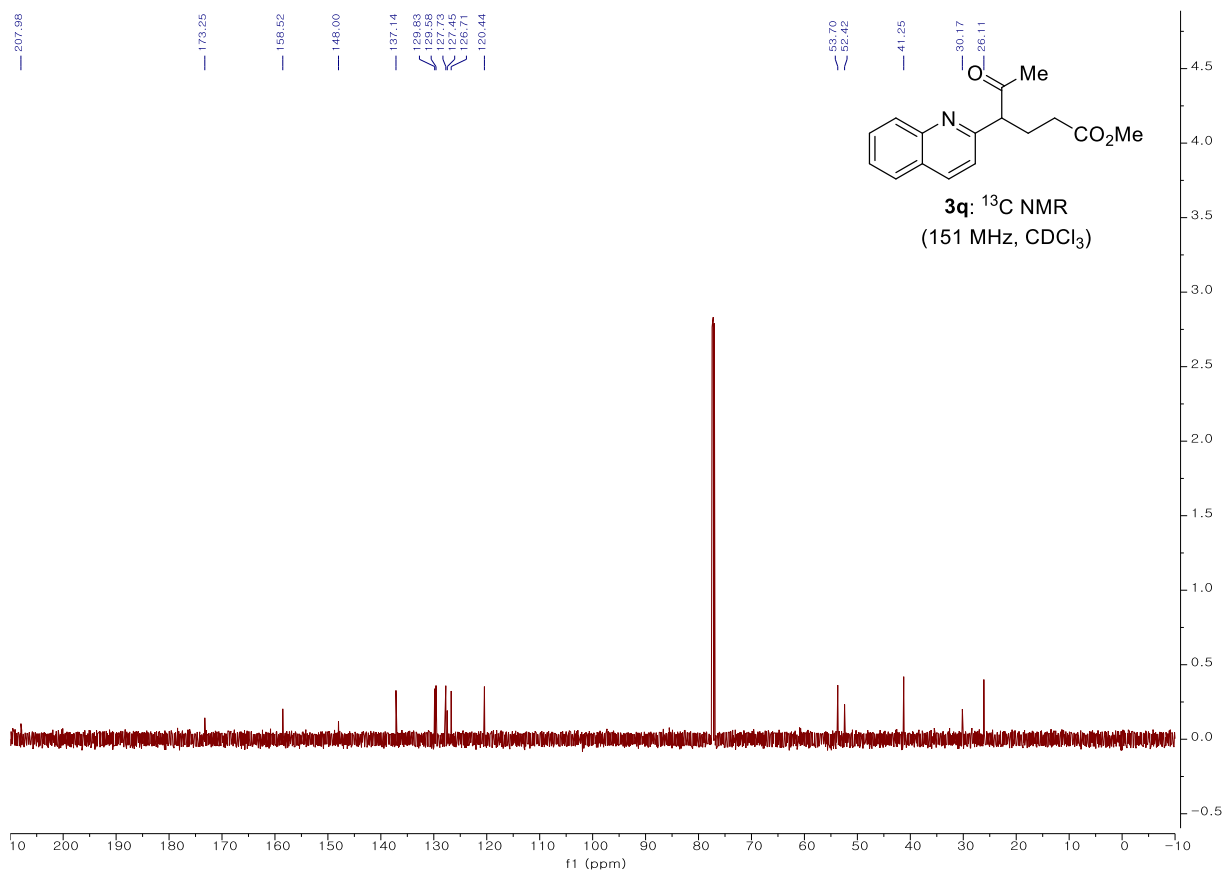

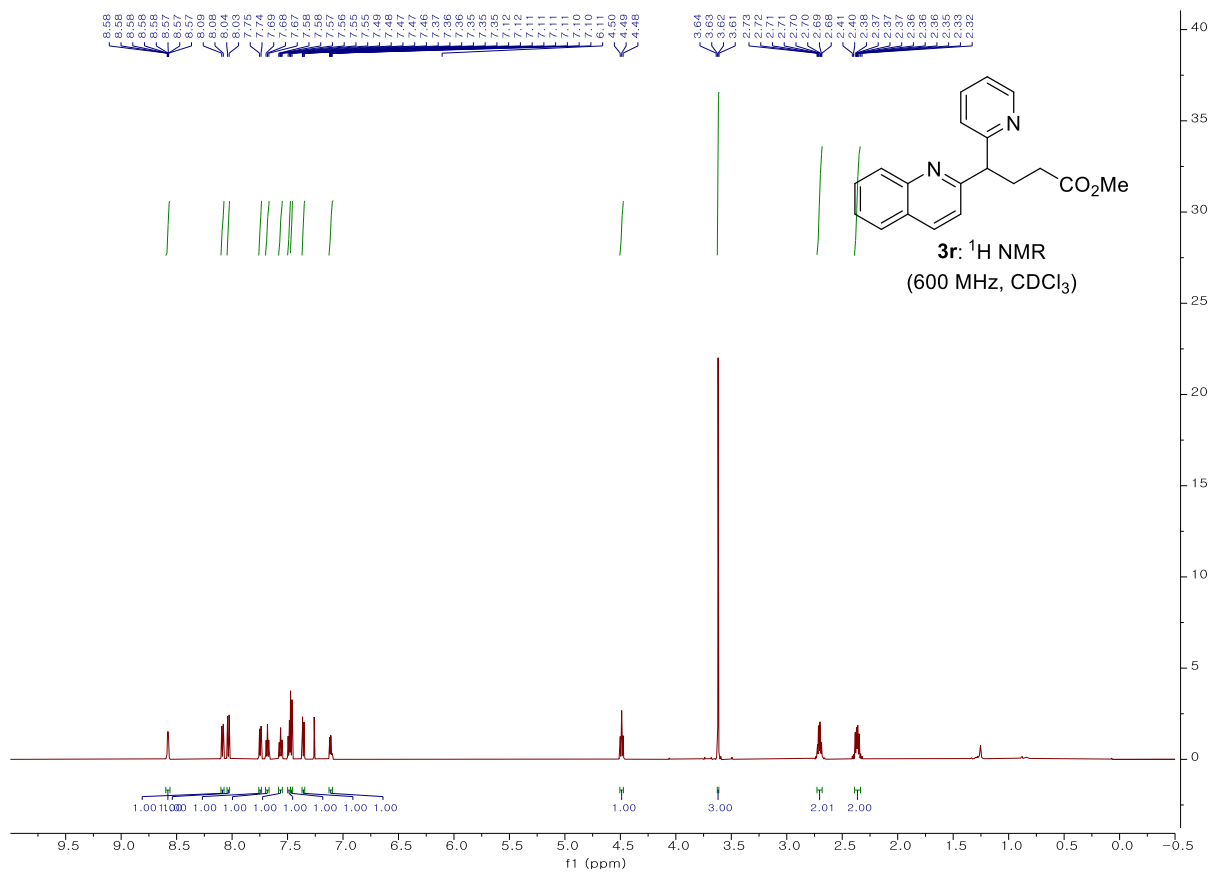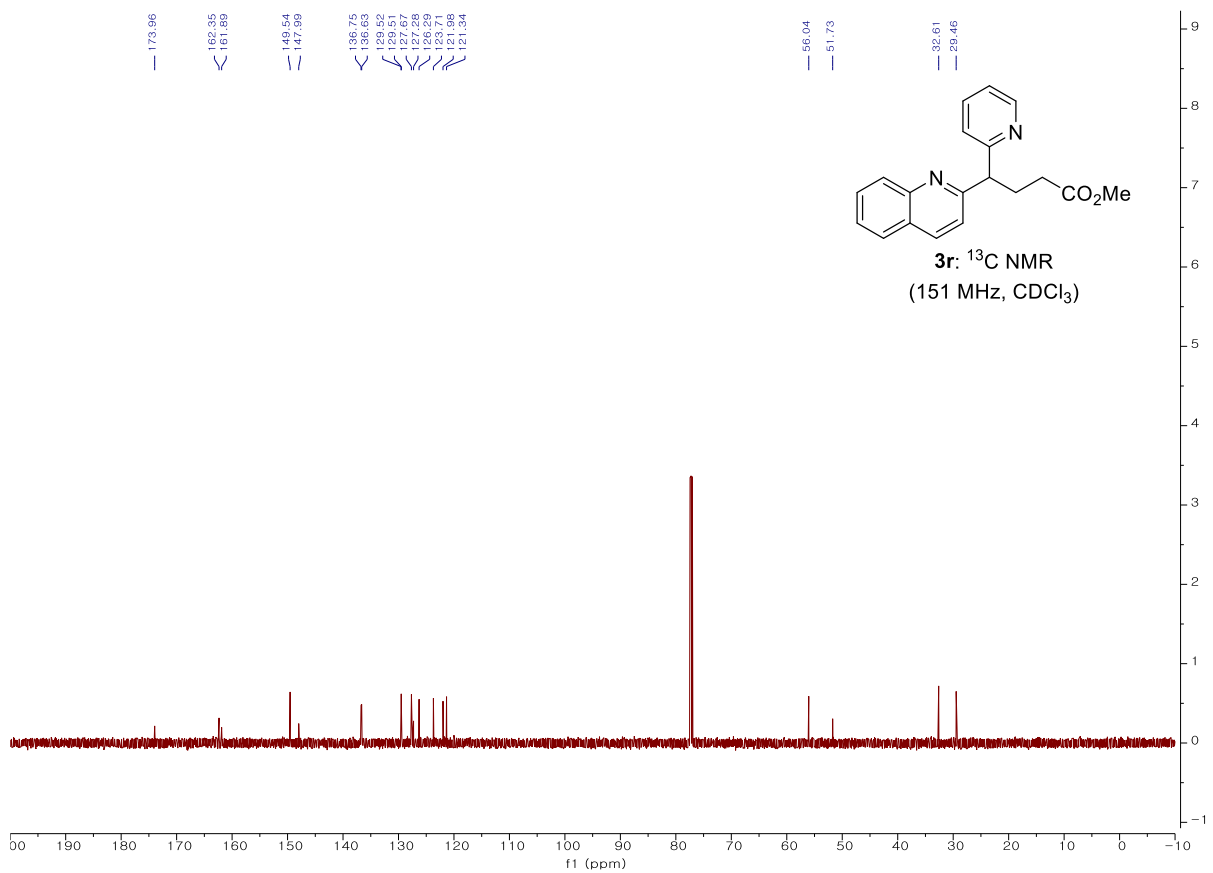



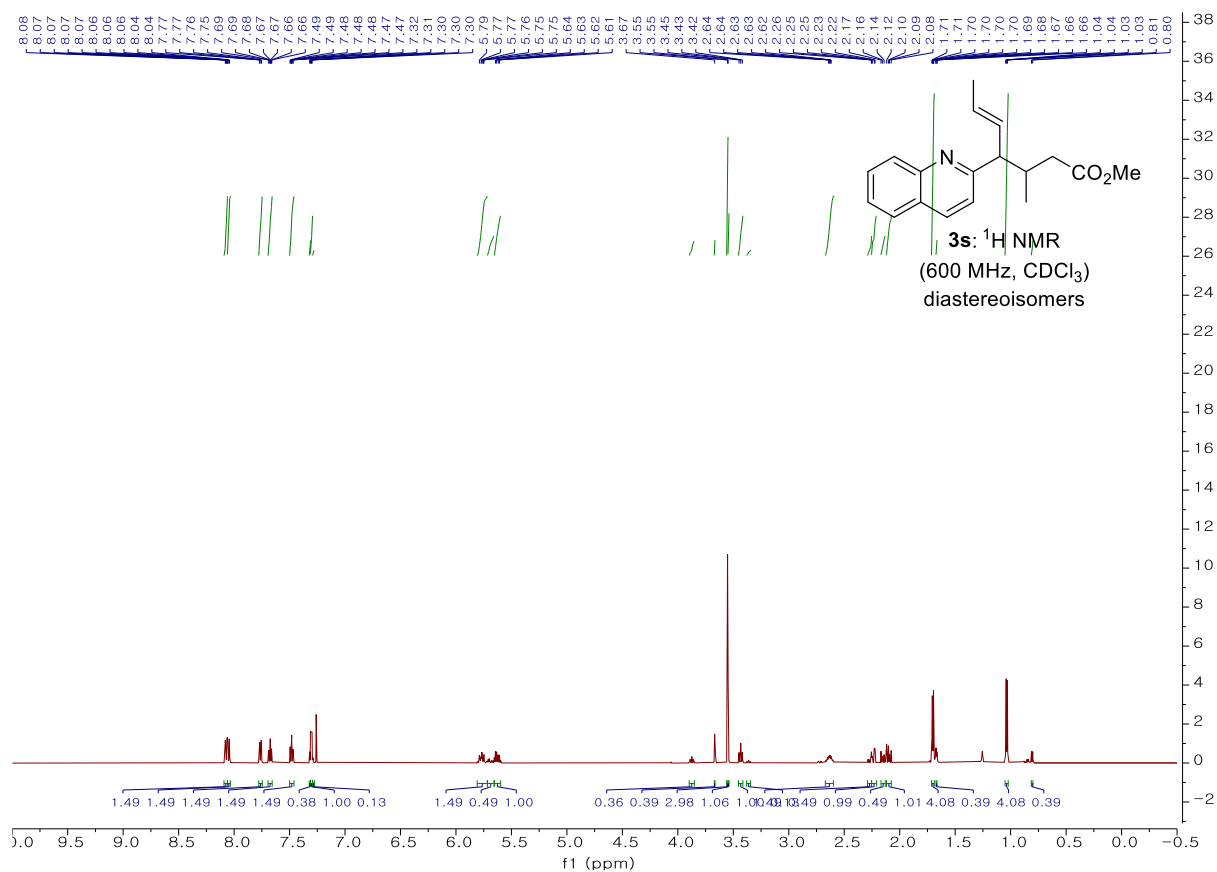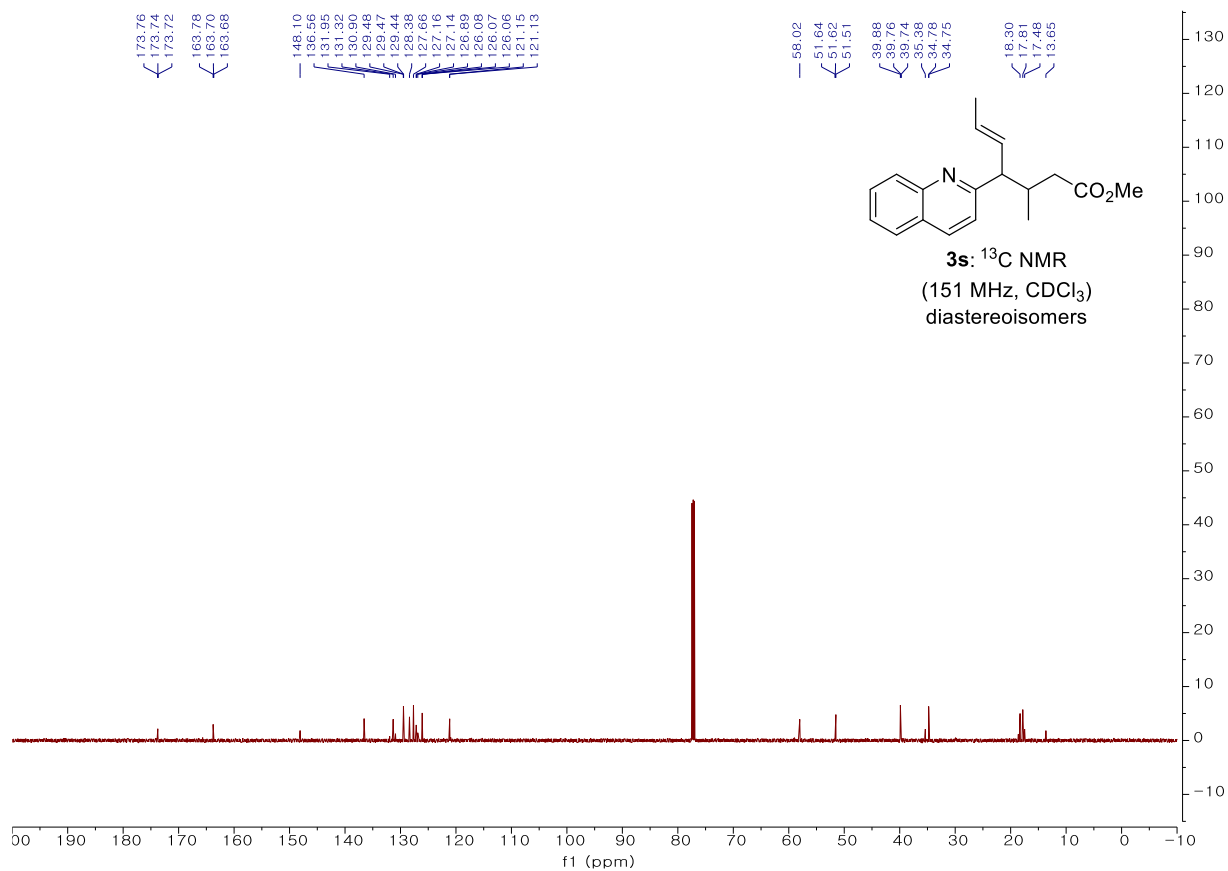

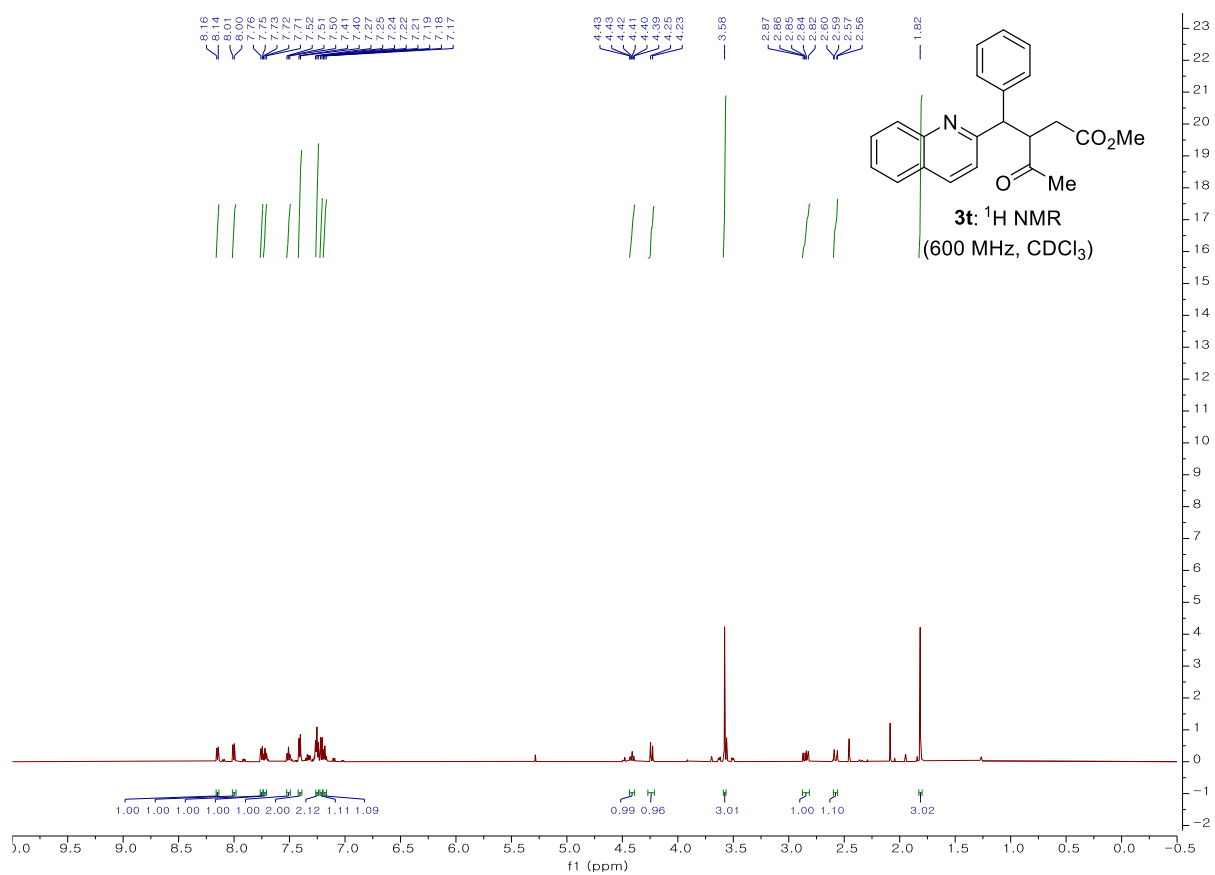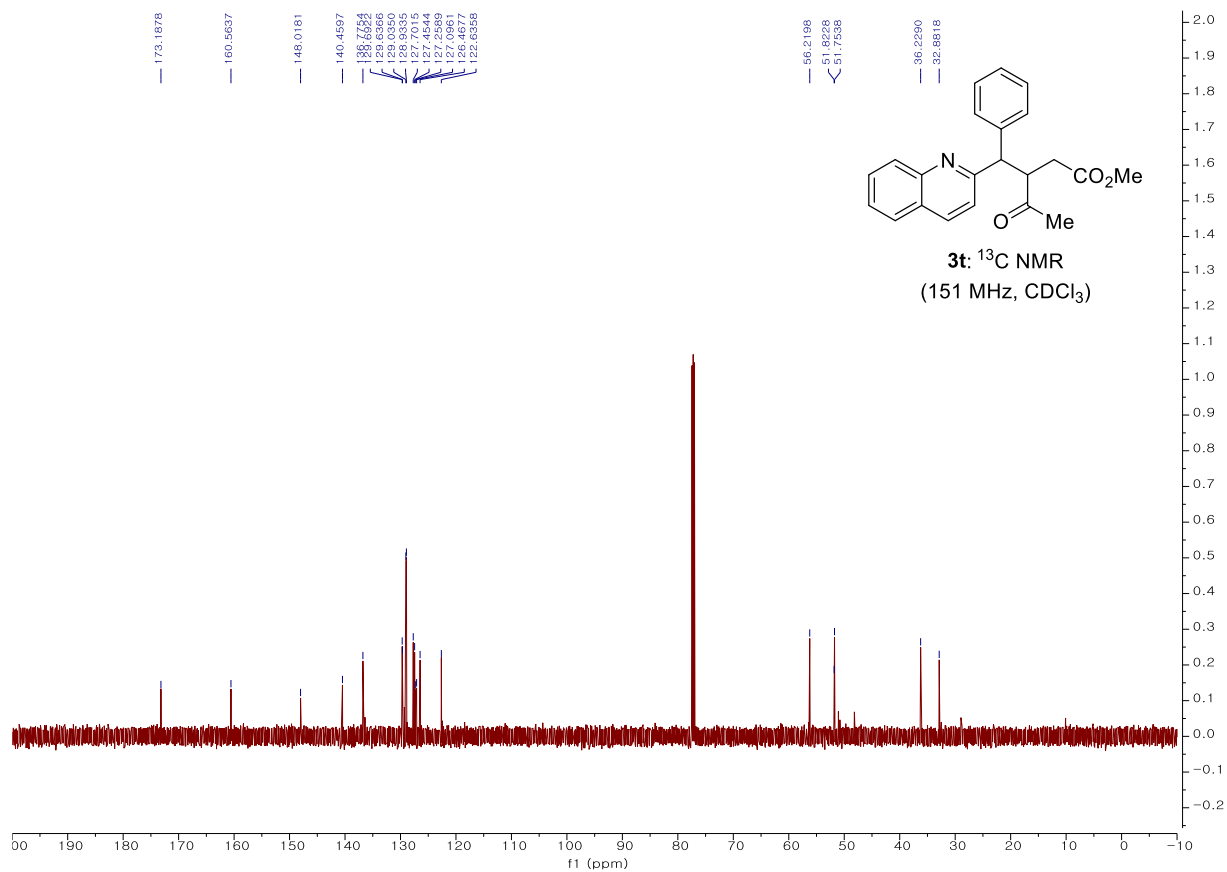

Supplement: d4sc02601b1.pdf [file d4sc02601b1.pdf]
